# Supplementary material for: Effects of Drying Methods on Antioxidant, Anti-Inflammatory, and Anticancer Potentials of Phenolic Acids in Lovage Elicited by Jasmonic Acid and Yeast Extract
Source: MDPI journal article supplement (doi:10.3390/antiox10050662), 2021-04-24
Supplement: s1 [file s1]

## MTT

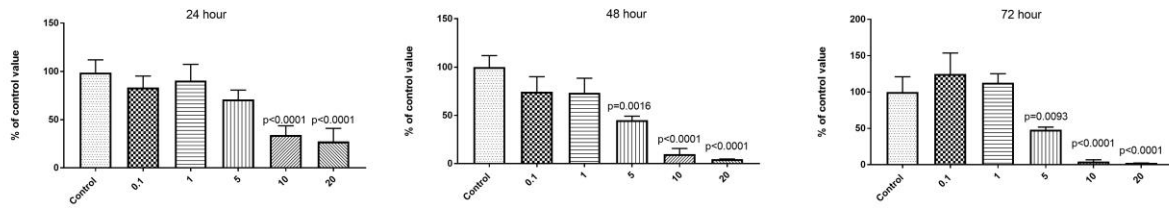

## NR

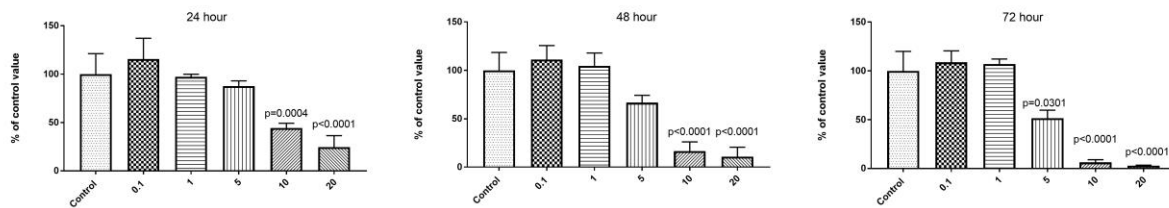

## Viability

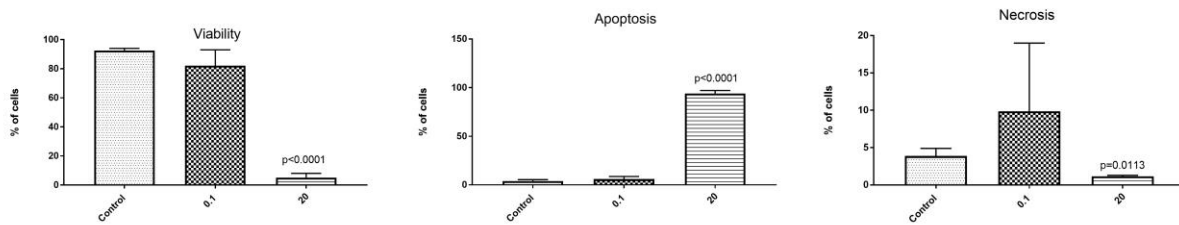

## Cell Cycle

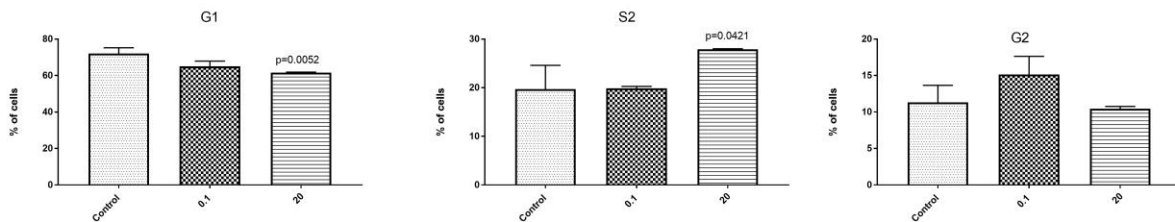

Figure S1. Impact of CL-E (ethanolic extract of control freeze-dried sample) on cytotoxicity (MTT and NR method), type of cell death (Annex V and PI test) and individual phases of the cell cycle of the healthy prostate epithelial cells (HPrEC ATCC® PCS-440-010™ cell line).

## MTT

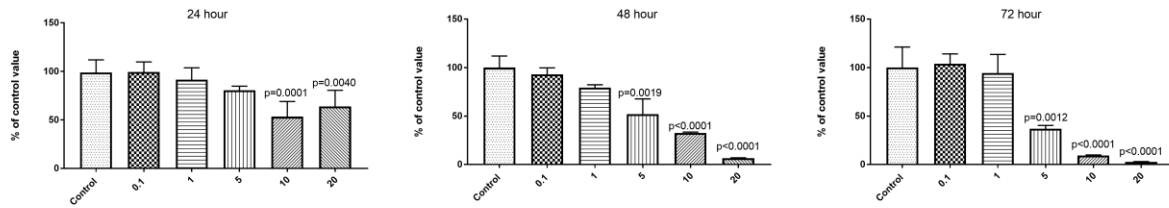

## NR

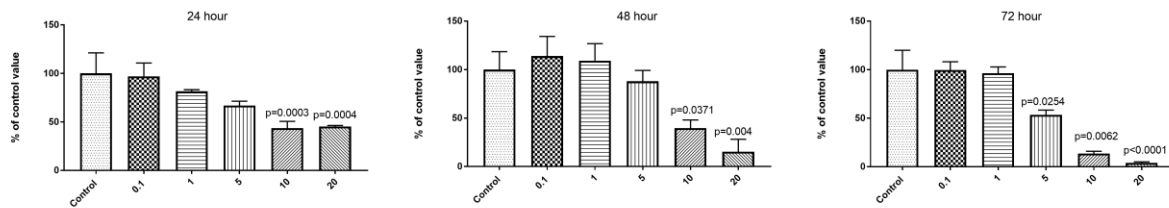

## Viability

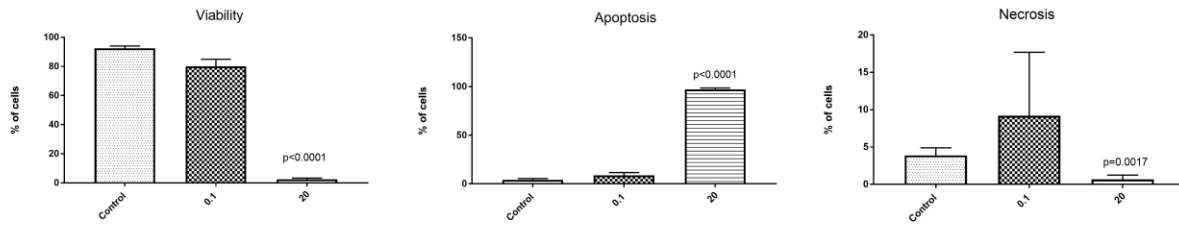

## Cell Cycle

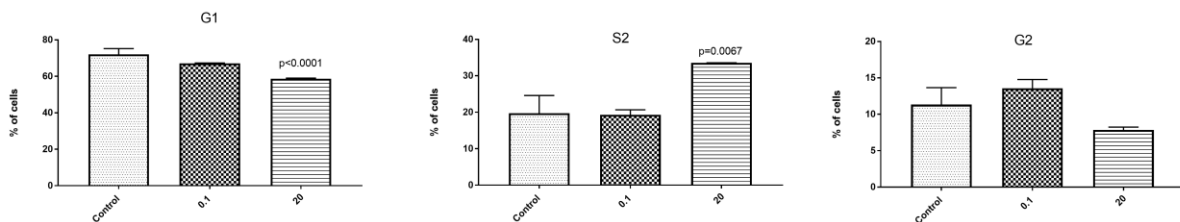

Figure S2. Impact of JAL-E (ethanolic extract of freeze-dried sample from plants elicited with 10  $\mu$ M of jasmonic acid) on cytotoxicity (MTT and NR method), type of cell death (Annex V and PI test) and individual phases of the cell cycle of the healthy prostate epithelial cells (HPrEC ATCC® PCS-440-010™ cell line).

## MTT

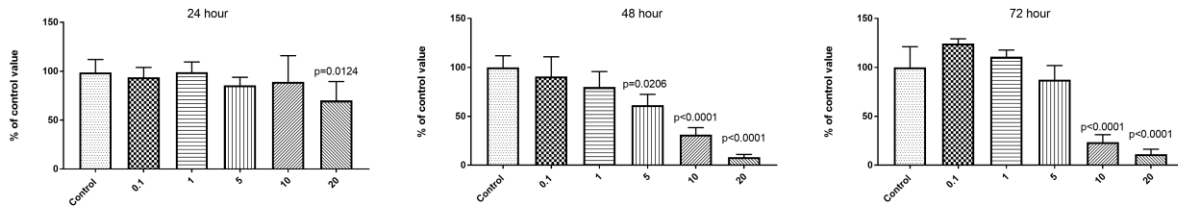

## NR

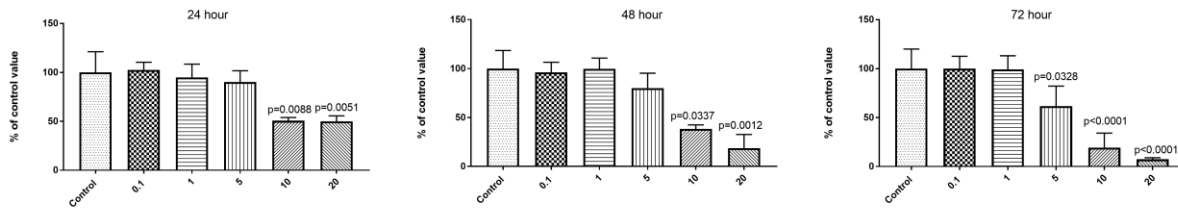

## Viability

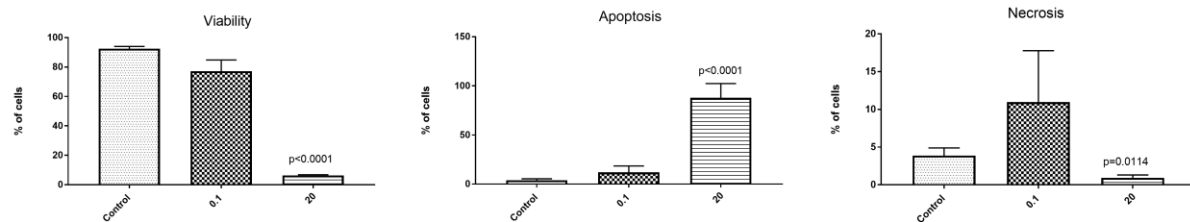

## Cell Cycle

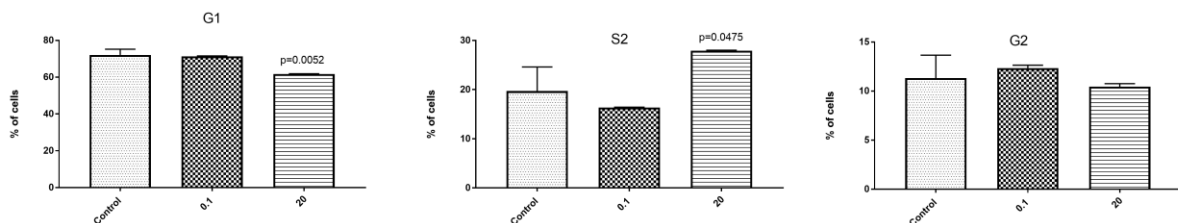

Figure S3. Impact of YEL-E (ethanolic extract of freeze-dried sample from plants elicited with 0.1% yeast extract) on cytotoxicity (MTT and NR method), type of cell death (Annex V and PI test) and individual phases of the cell cycle of the healthy prostate epithelial cells (HPrEC ATCC® PCS-440-010™ cell line).

## MTT

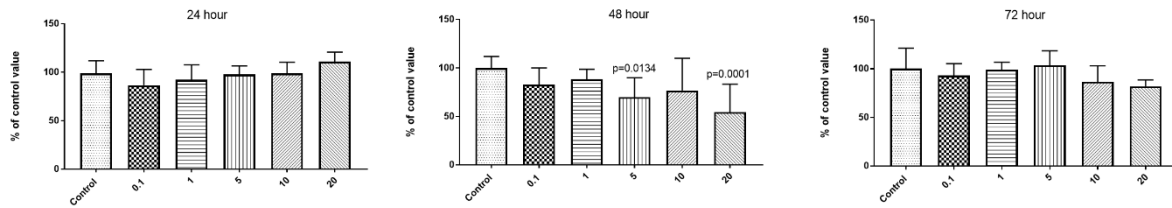

## NR

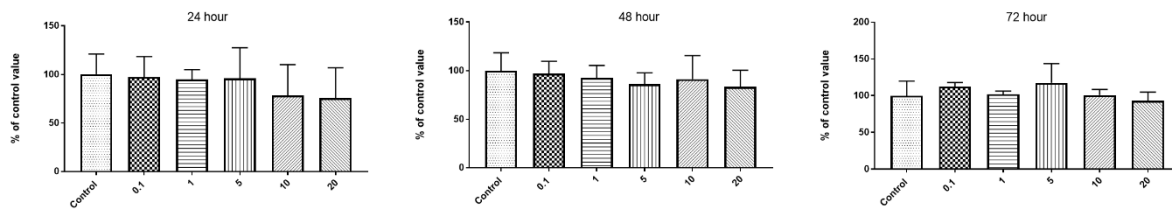

## Viability

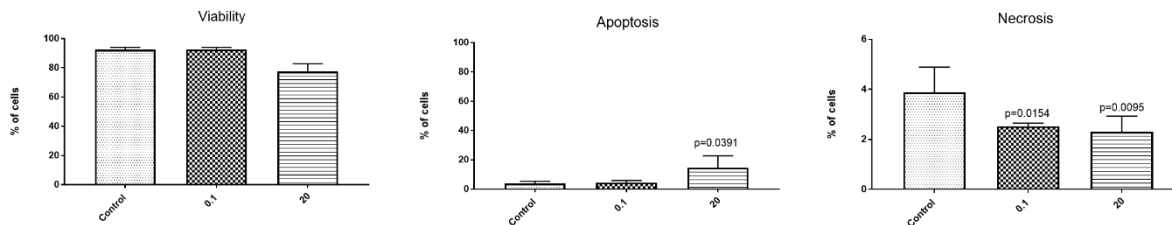

## Cell Cycle

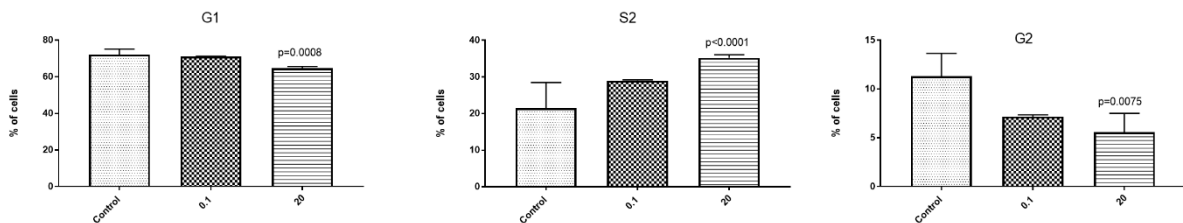

Figure S4. Impact of CL-GD extract (sample after the *in vitro* digestion of control freeze-dried sample) on cytotoxicity (MTT and NR method), type of cell death (Annex V and PI test) and individual phases of the cell cycle of the healthy prostate epithelial cells (HPrEC ATCC® PCS-440-010™ cell line).



## MTT

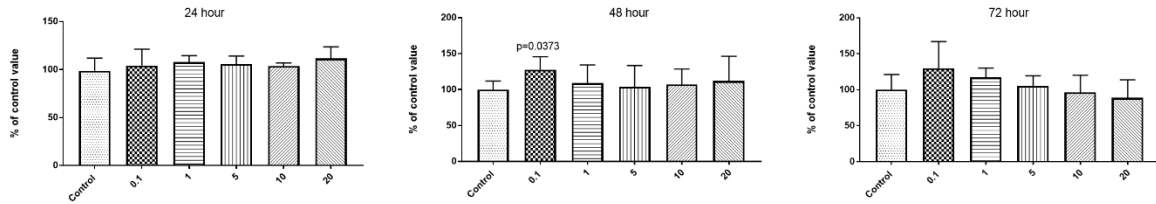

## NR

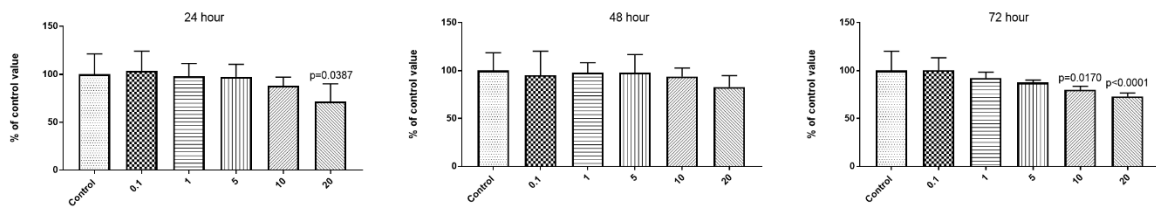

## Viability

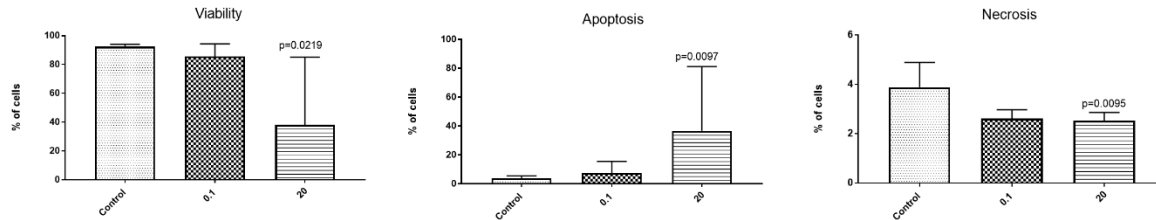

## Cell Cycle

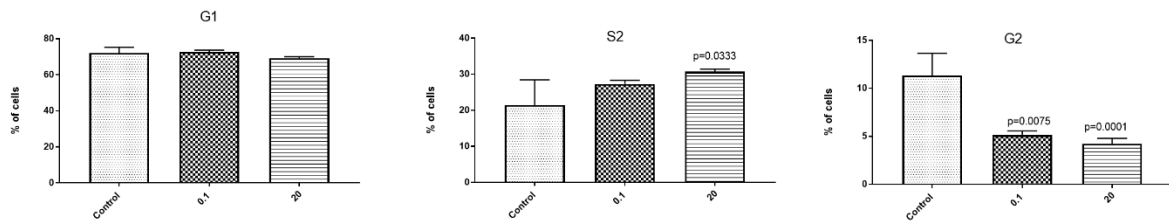

Figure S5. Impact of JAL-GD (sample after the *in vitro* digestion of freeze-dried sample from plants elicited with 10  $\mu$ M of jasmonic acid) on cytotoxicity (MTT and NR method), type of cell death (Annex V and PI test) and individual phases of the cell cycle of the healthy prostate epithelial cells (HPrEC ATCC<sup>®</sup> PCS-440-010<sup>™</sup> cell line).

## MTT

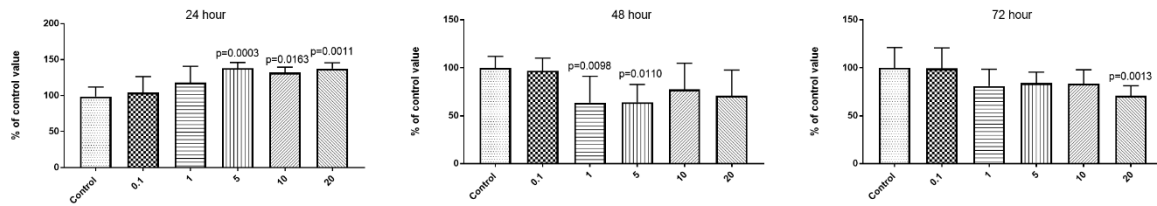

## NR

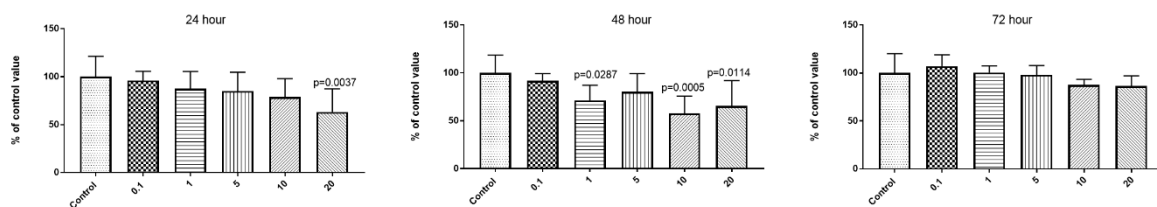

## Viability

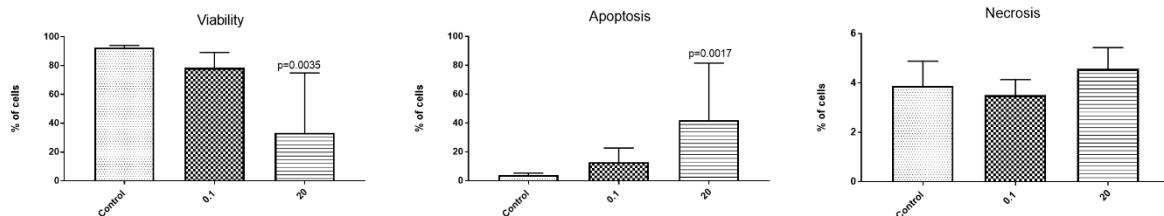

## Cell Cycle

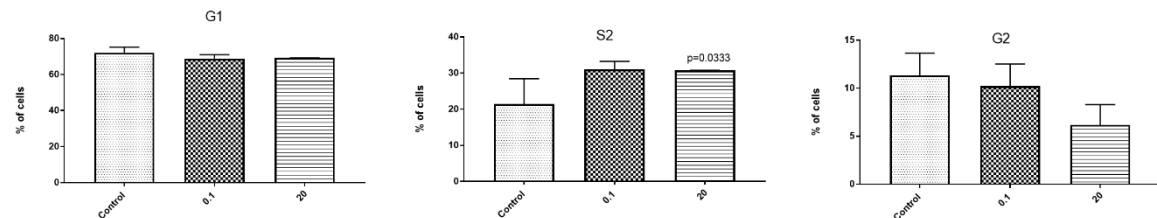

Figure S6. Impact of YEL -GD extract (sample after the *in vitro* digestion of freeze-dried sample from plants elicited with 0.1% yeast extract) on cytotoxicity (MTT and NR method), type of cell death (Annex V and PI test) and individual phases of the cell cycle of the healthy prostate epithelial cells (HPrEC ATCC<sup>®</sup> PCS-440-010<sup>™</sup> cell line).

## MTT

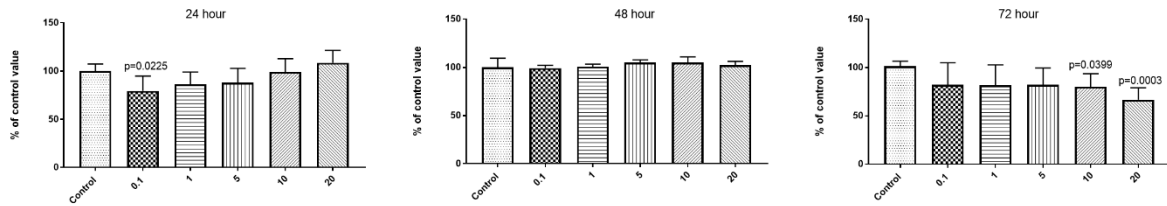

## NR

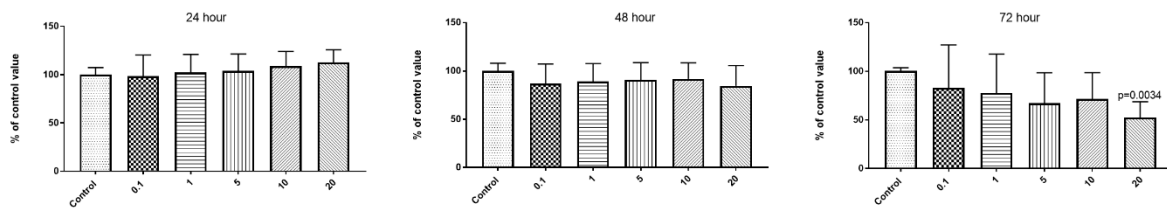

## Viability

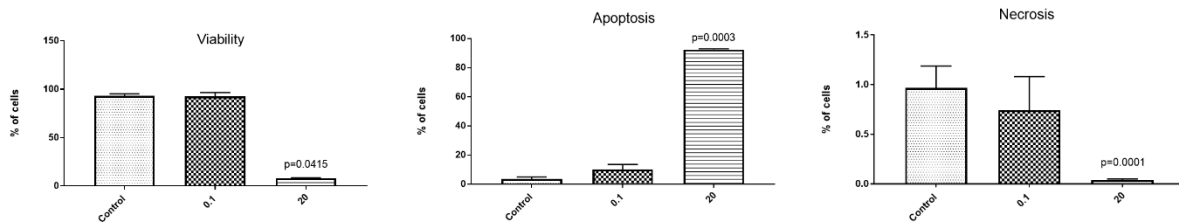

## Cell Cycle

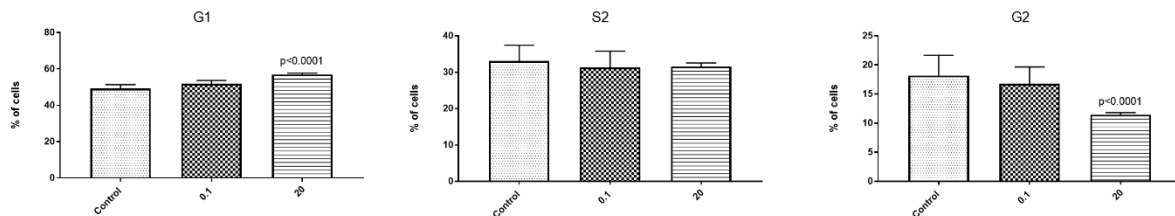

Figure S7. Impact of CL-E (ethanolic extract of control freeze-dried sample) on cytotoxicity (MTT and NR method), type of cell death (Annex V and PI test) and individual phases of the cancer gastric epithelial NCI-N87 (ATCC® CRL5822™) cell line.

## MTT

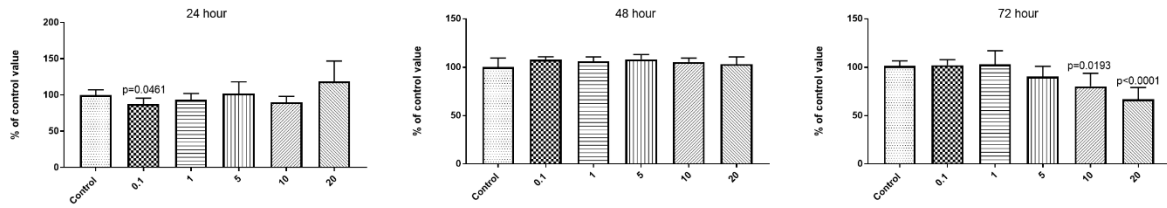

## NR

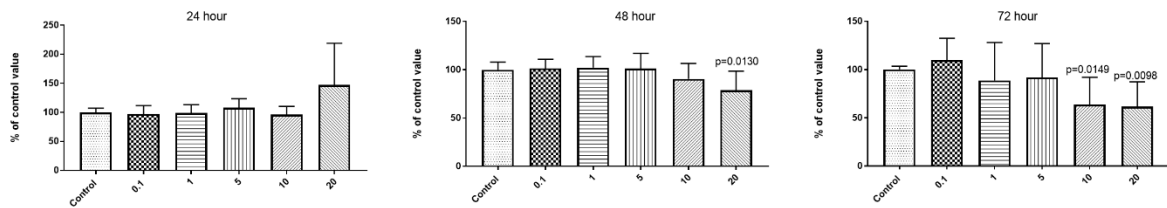

## Viability

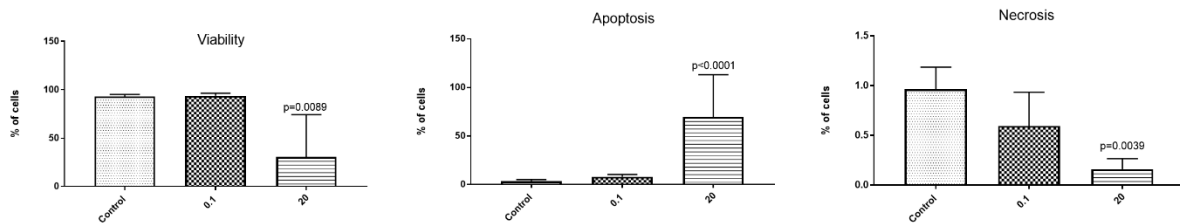

## Cell Cycle

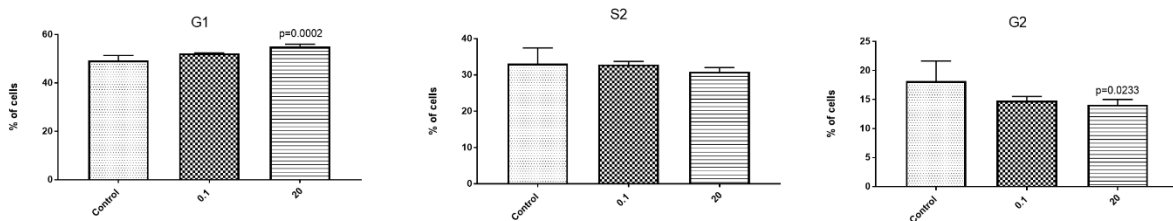

Figure S8. Impact of JAL-E (ethanolic extract of freeze-dried sample from plants elicited with 10  $\mu$ M of jasmonic acid) on cytotoxicity (MTT and NR method), type of cell death (Annex V and PI test) and individual phases of the cancer gastric epithelial NCI-N87 (ATCC® CRL5822™) cell line.

## MTT

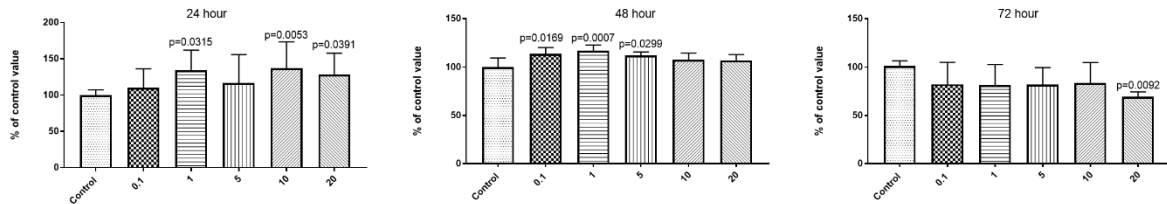

## NR

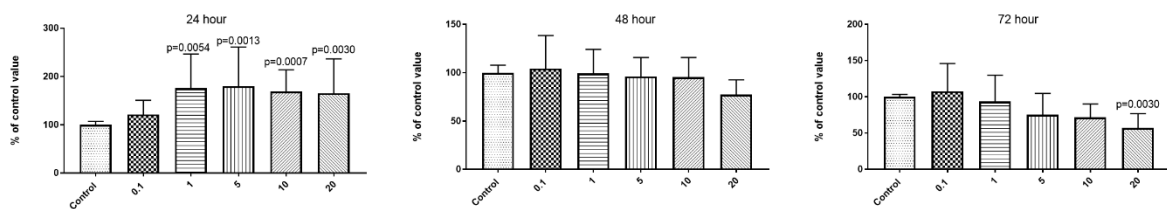

## Viability

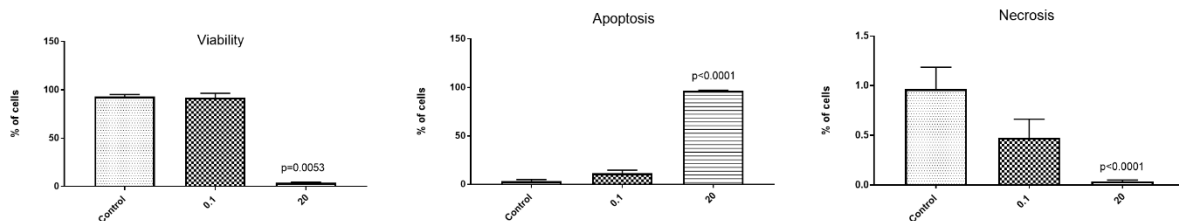

## Cell Cycle

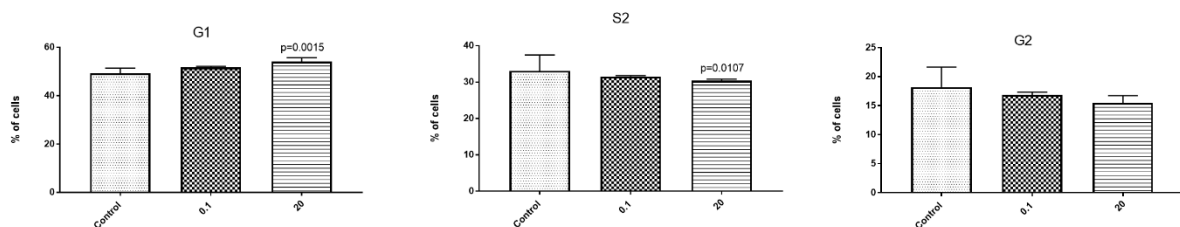

Figure S9. Impact of YEL-E (ethanolic extract of freeze-dried sample from plants elicited with 0.1% yeast extract) on cytotoxicity (MTT and NR method), type of cell death (Annex V and PI test) and individual phases of the cancer gastric epithelial NCI-N87 (ATCC® CRL5822™) cell line.

## MTT

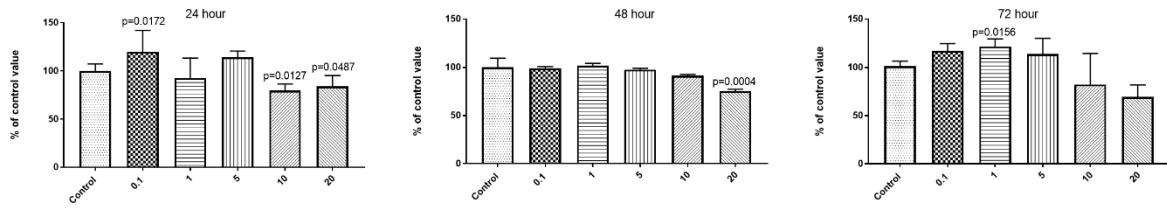

## NR

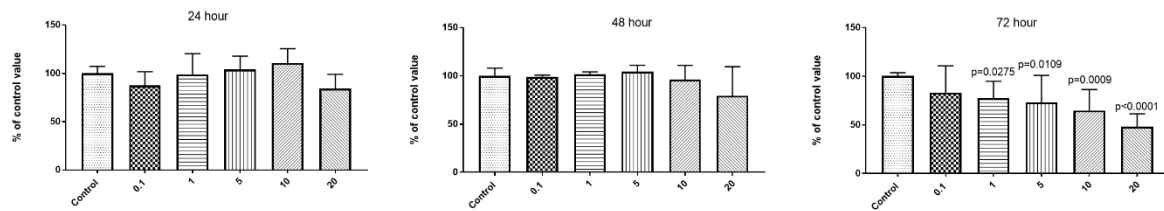

## Viability

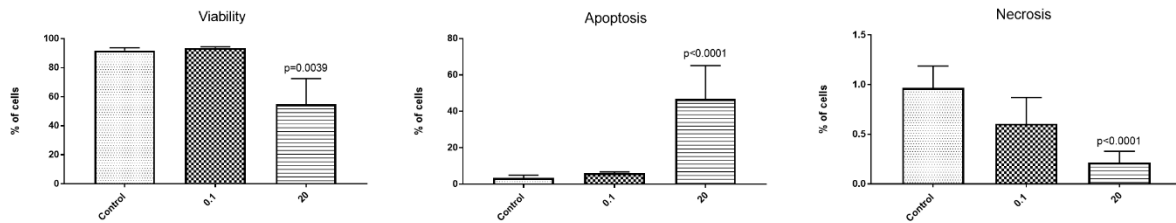

## Cell Cycle

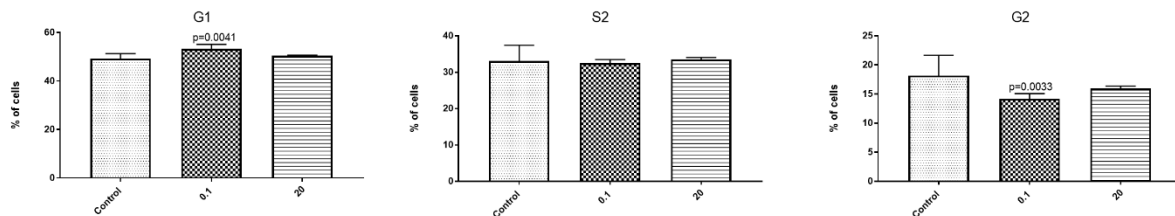

Figure S10. Impact of CL -GD extract (sample after the *in vitro* digestion of control freeze-dried sample) on cytotoxicity (MTT and NR method), type of cell death (Annex V and PI test) and individual phases of the cancer gastric epithelial NCI-N87 (ATCC® CRL5822™) cell line.

## MTT

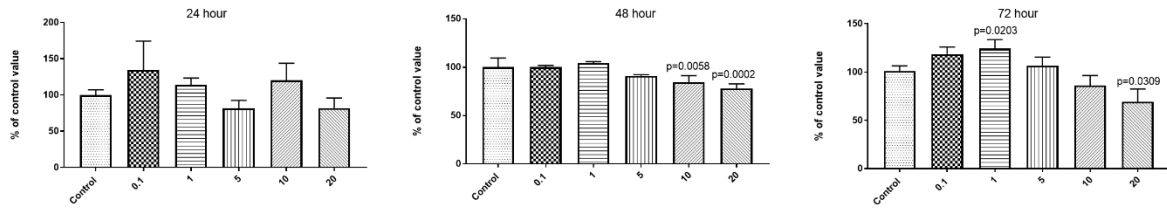

## NR

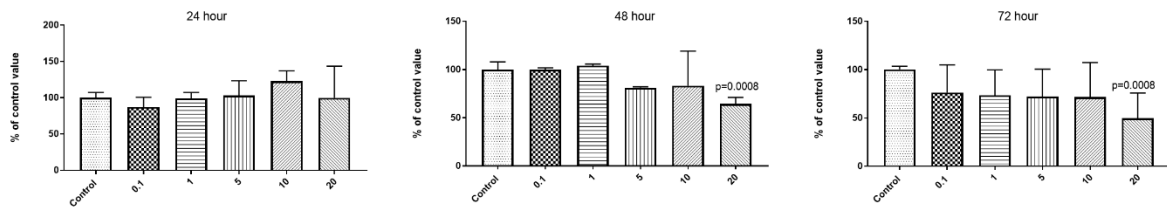

## Viability

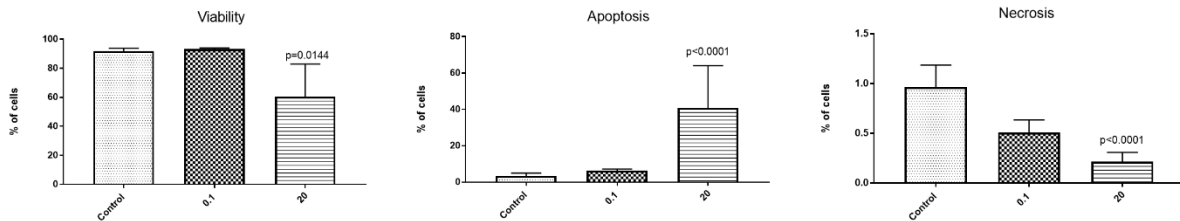

## Cell Cycle

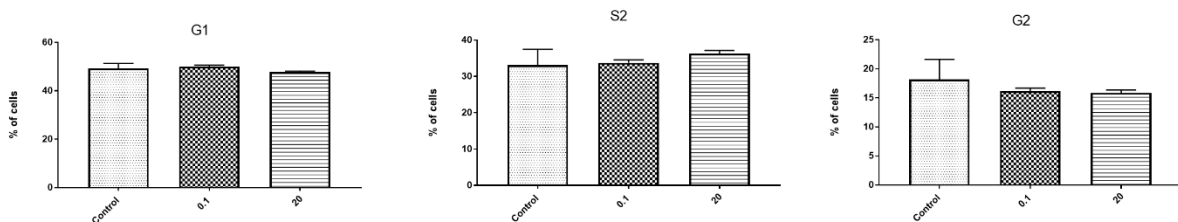

Figure S11. Impact of JAL -GD extract (sample after the *in vitro* digestion of freeze-dried sample from plants elicited with 10  $\mu$ M of jasmonic acid) on cytotoxicity (MTT and NR method), type of cell death (Annex V and PI test) and individual phases of the cancer gastric epithelial NCI-N87 (ATCC® CRL5822™) cell line.

## MTT

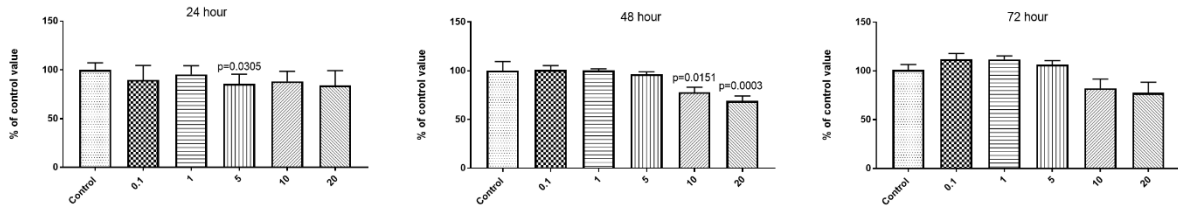

## NR

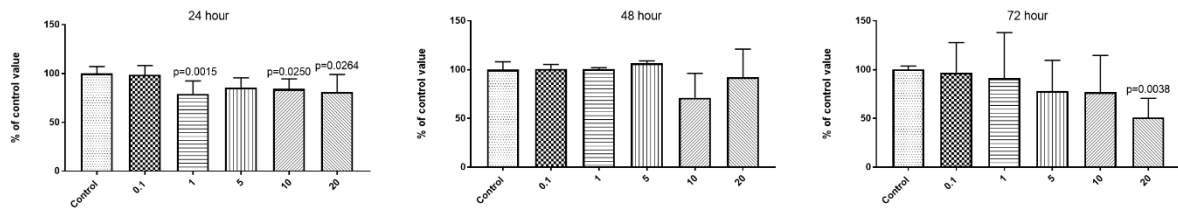

## Viability

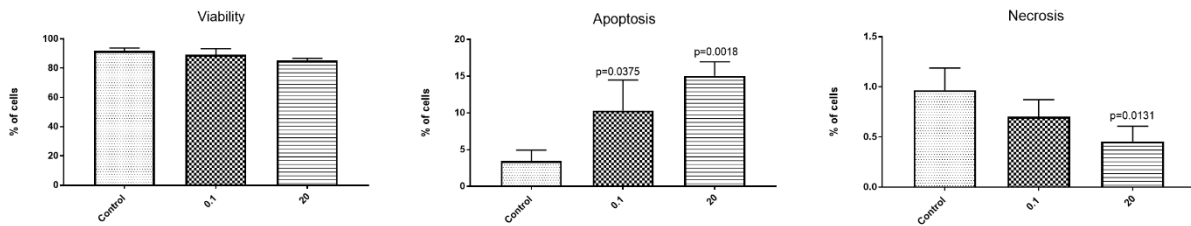

## Cell Cycle

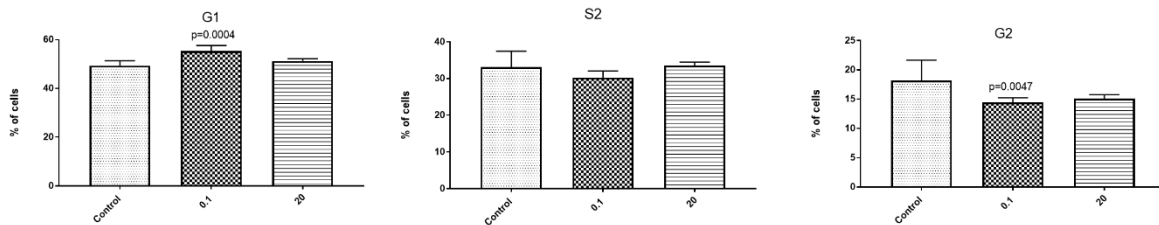

Figure S12. Impact of YEL -GD extract (sample after the *in vitro* digestion of freeze-dried sample from plants elicited with 0.1% yeast extract) on cytotoxicity (MTT and NR method), type of cell death (Annex V and PI test) and individual phases of the cancer gastric epithelial NCI-N87 (ATCC® CRL5822™) cell line.



## MTT

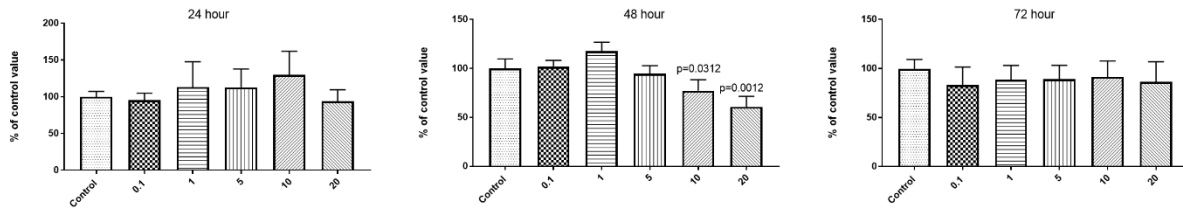

## NR

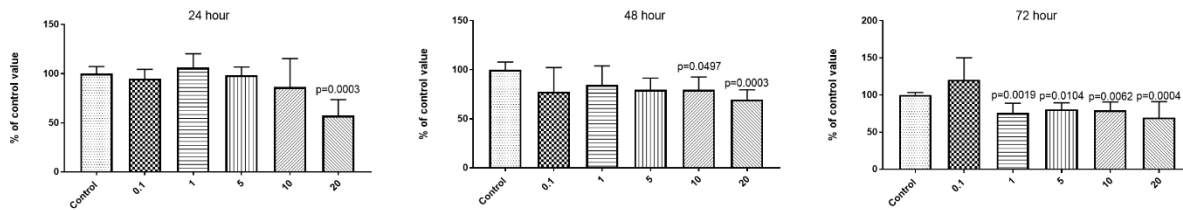

## Viability

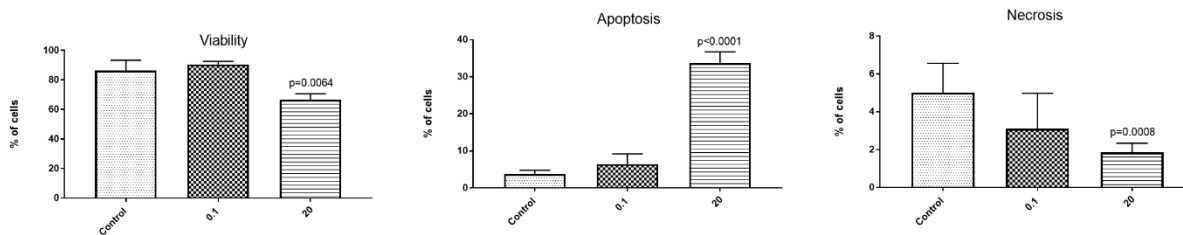

## Cell Cycle

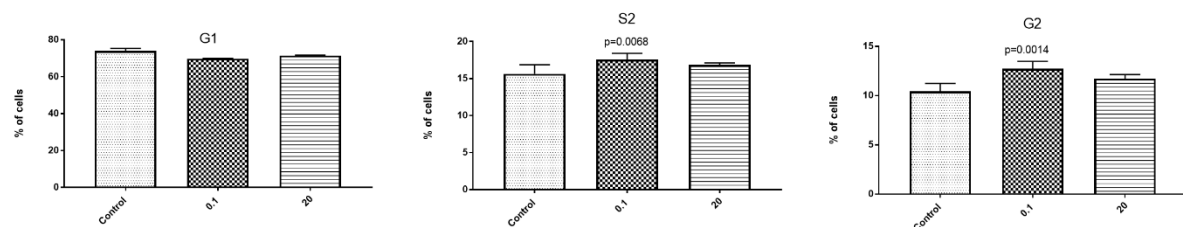

Figure S13. Impact of CL-E (ethanolic extract of control freeze-dried sample) on cytotoxicity (MTT and NR method), type of cell death (Annex V and PI test) and individual phases of the prostate cancer line VCaP – (ATCC® CRL-2876™).

## MTT

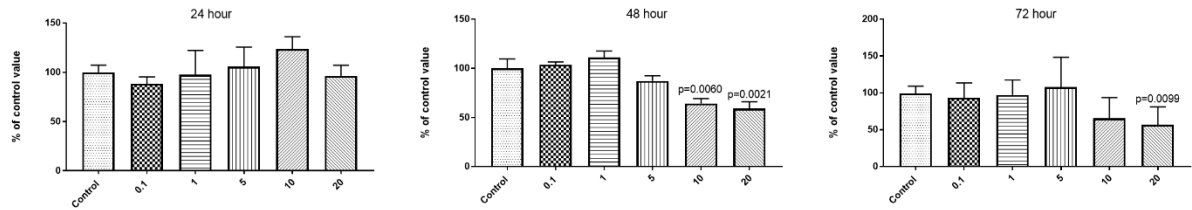

## NR

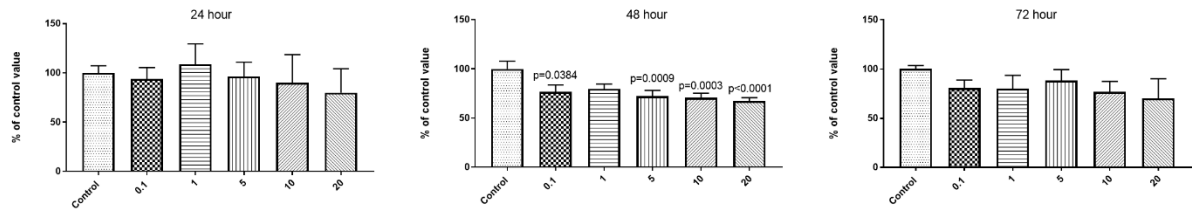

## Viability

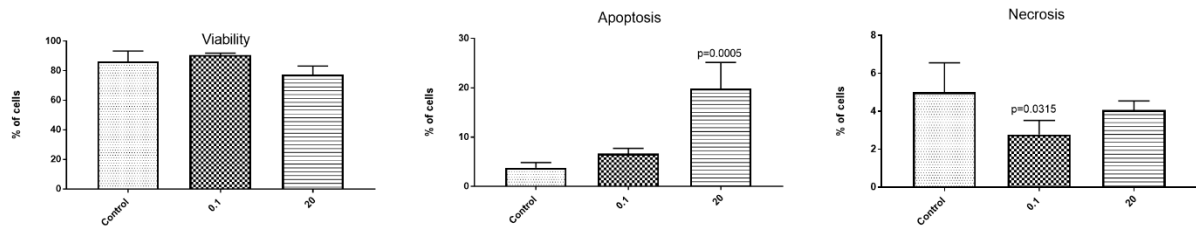

## Cell Cycle

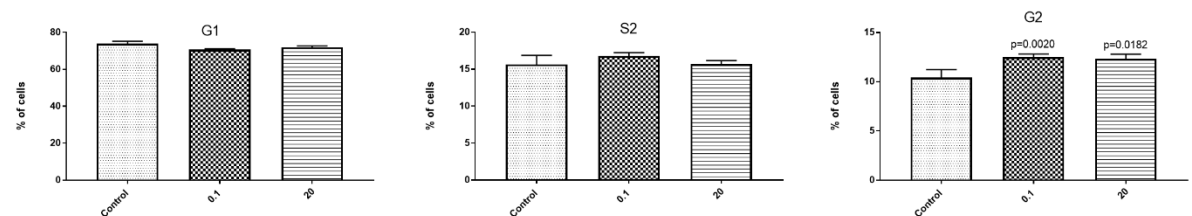

Figure S14. Impact of JAL-E (ethanolic extract of freeze-dried sample from plants elicited with 10  $\mu$ M of jasmonic acid) on cytotoxicity (MTT and NR method), type of cell death (Annex V and PI test) and individual phases of the prostate cancer line VCaP – (ATCC® CRL-2876™).

## MTT

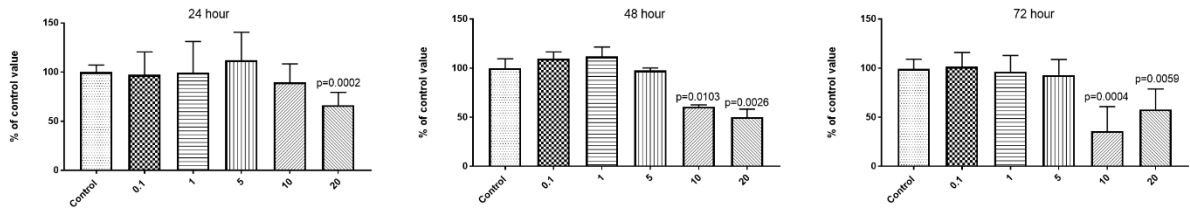

## NR

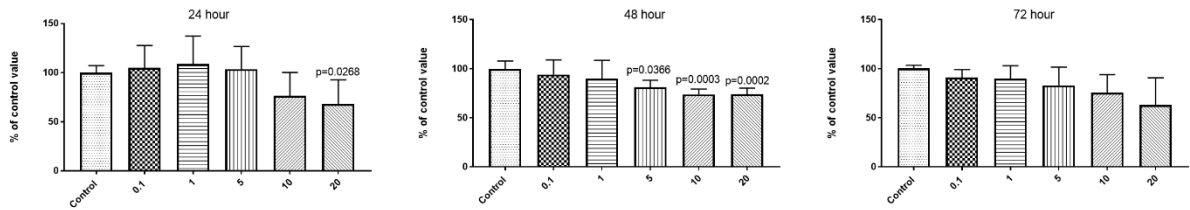

## Viability

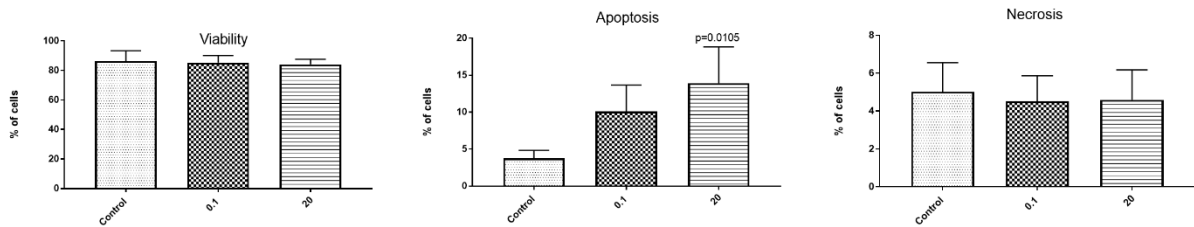

## Cell Cycle

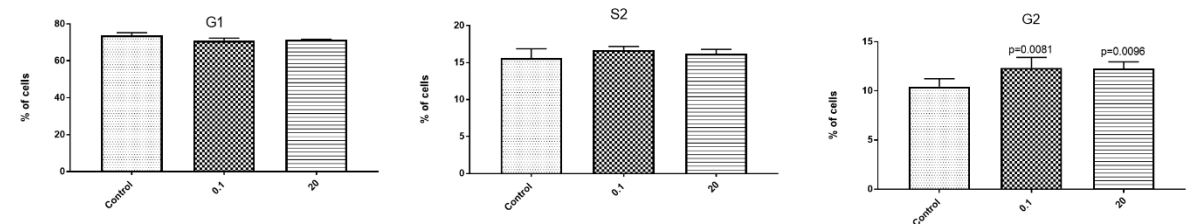

Figure S15. Impact of YEL-E (ethanolic extract of freeze-dried sample from plants elicited with 0.1% yeast extract) on cytotoxicity (MTT and NR method), type of cell death (Annex V and PI test) and individual phases of the prostate cancer line VCaP – (ATCC® CRL-2876™).

## MTT

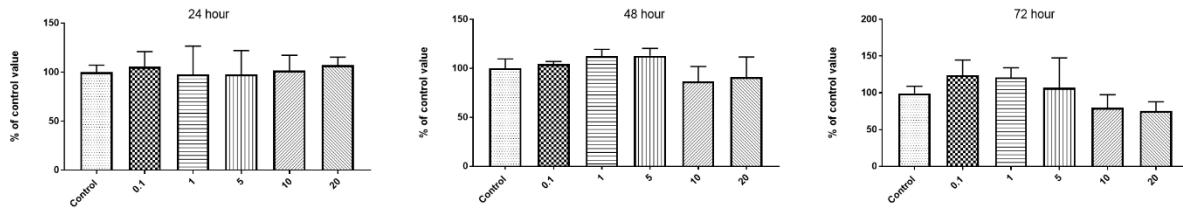

## NR

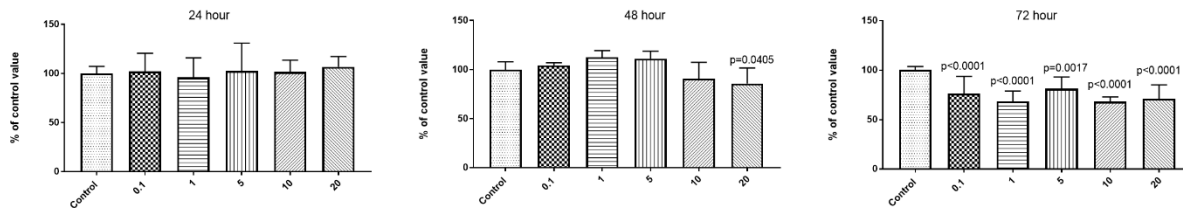

## Viability

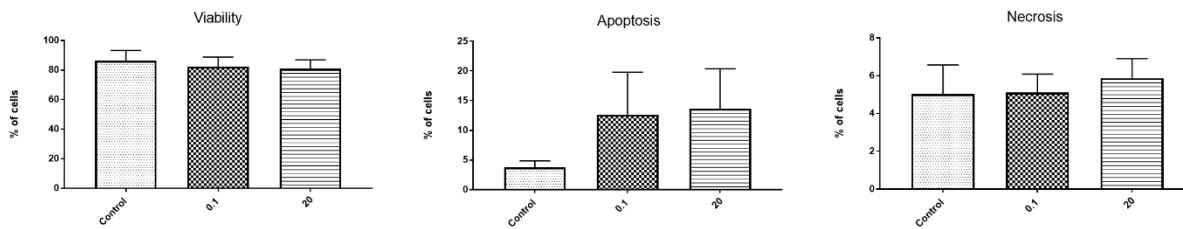

## Cell Cycle

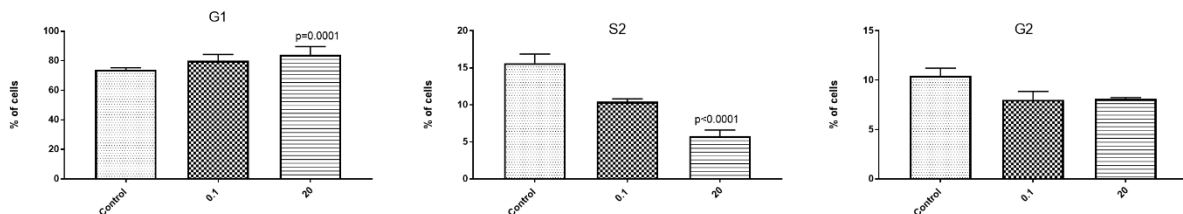

Figure S16. Impact of CL-GD extract (sample after the *in vitro* digestion of control freeze-dried sample) on cytotoxicity (MTT and NR method), type of cell death (Annex V and PI test) and individual phases of the prostate cancer line VCaP – (ATCC® CRL-2876™).

## MTT

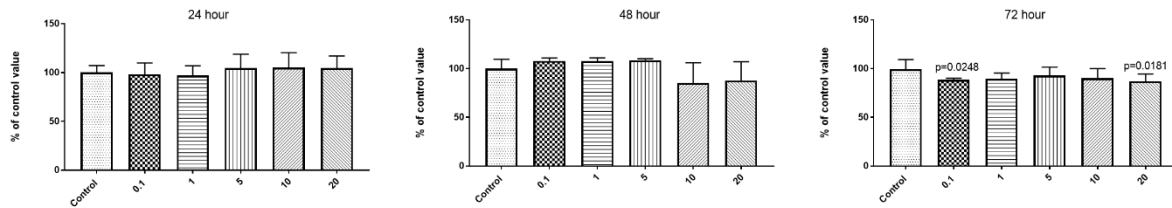

## NR

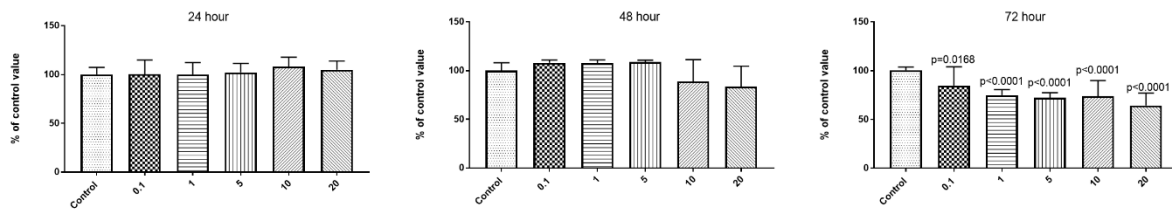

## Viability

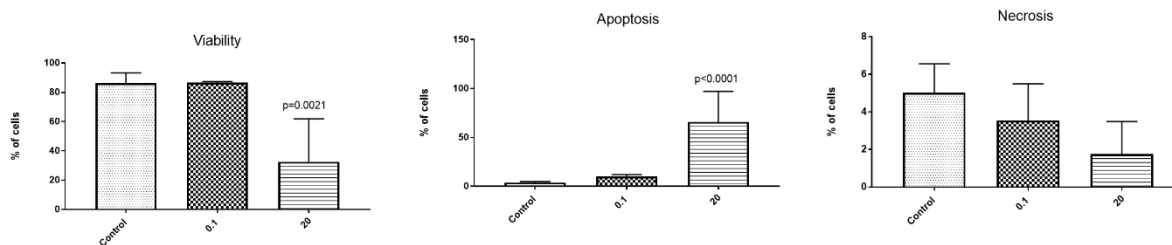

## Cell Cycle

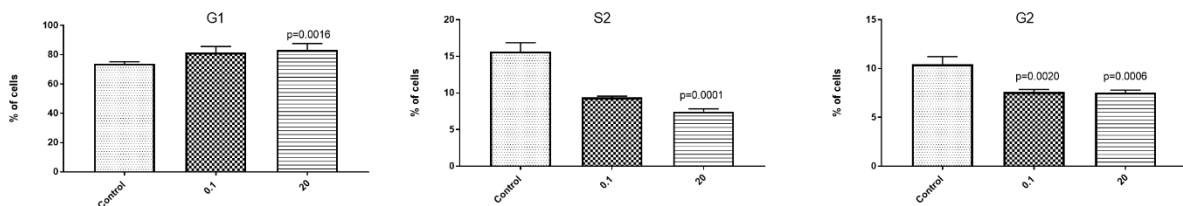

Figure S17. Impact of JAL -GD extract (sample after the *in vitro* digestion of freeze-dried sample from plants elicited with 10  $\mu$ M of jasmonic acid) on cytotoxicity (MTT and NR method), type of cell death (Annex V and PI test) and individual phases of the prostate cancer line VCaP – (ATCC® CRL-2876™).

## MTT

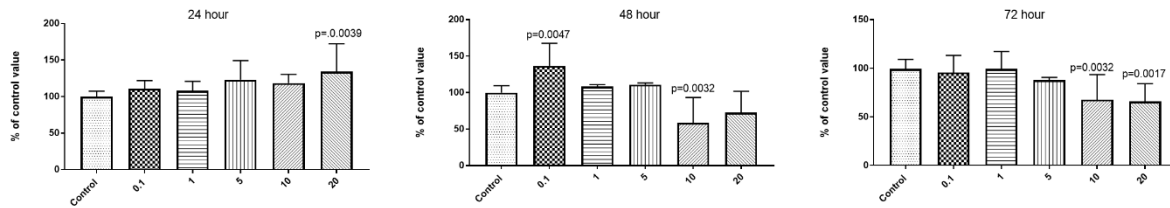

## NR

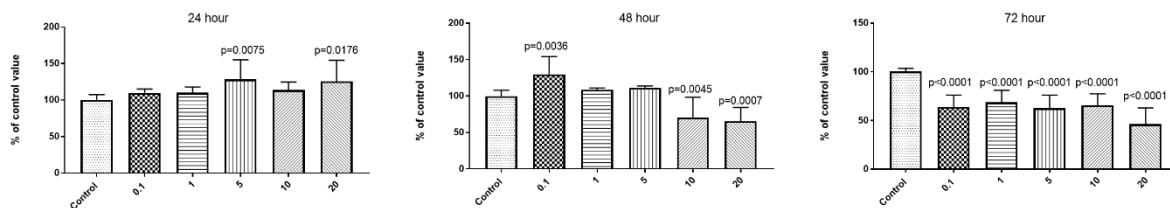

## Viability

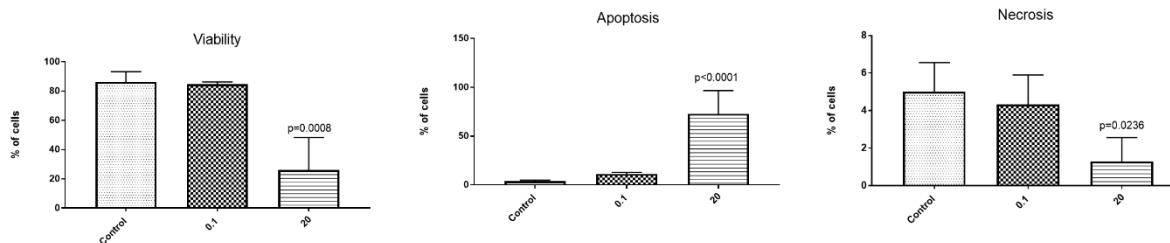

## Cell Cycle

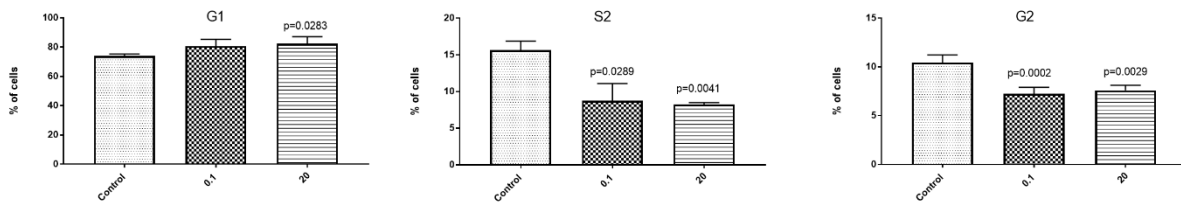

Figure S18. Impact of YEL -GD extract (sample after the *in vitro* digestion of freeze-dried sample from plants elicited with 0.1% yeast extract) on cytotoxicity (MTT and NR method), type of cell death (Annex V and PI test) and individual phases of the prostate cancer line VCaP – (ATCC® CRL-2876™).

## MTT

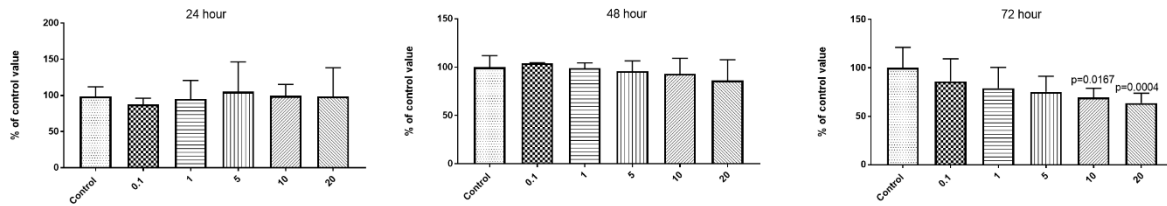

## NR

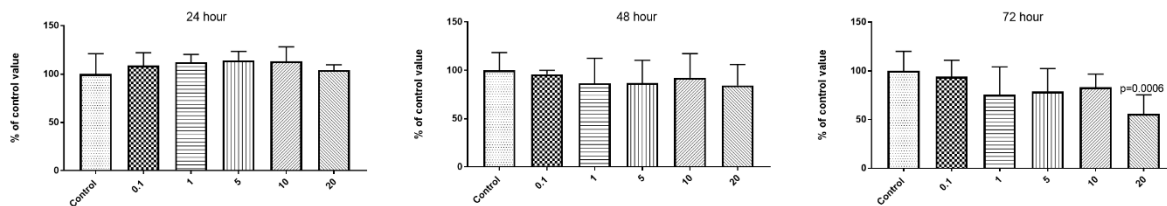

## Viability

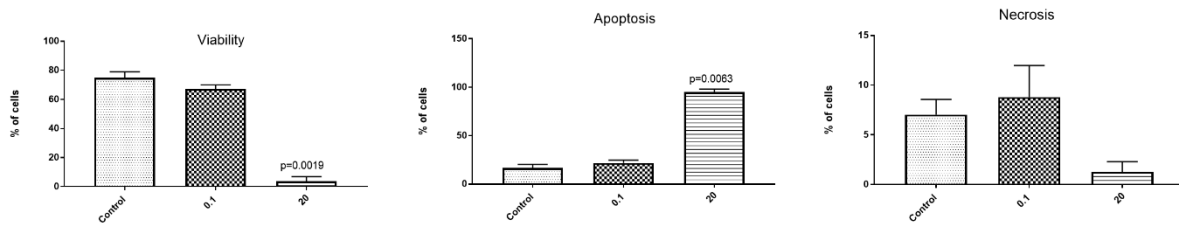

## Cell Cycle

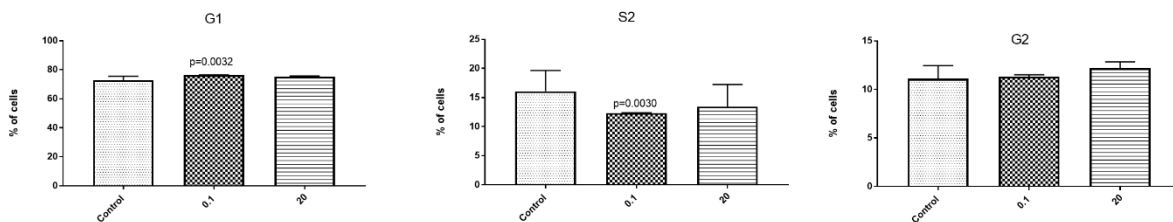

Figure S19. Impact of CM-E (ethanolic extract of control microwave-dried sample) on cytotoxicity (MTT and NR method), type of cell death (Annex V and PI test) and individual phases of the cell cycle of the healthy prostate epithelial cells (HPrEC ATCC® PCS-440-010™ cell line).

## MTT

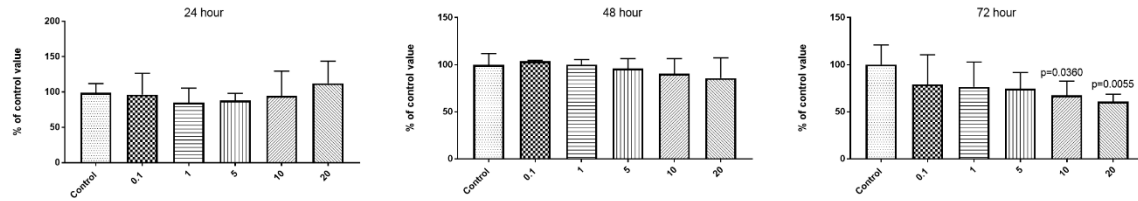

## NR

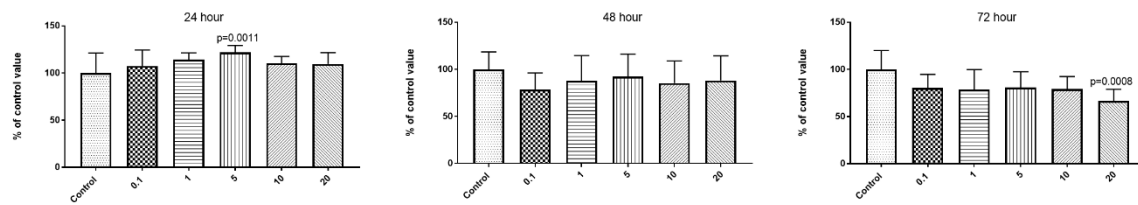

## Viability

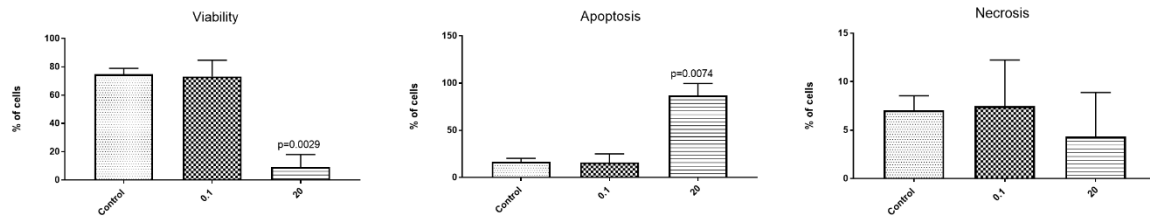

## Cell Cycle

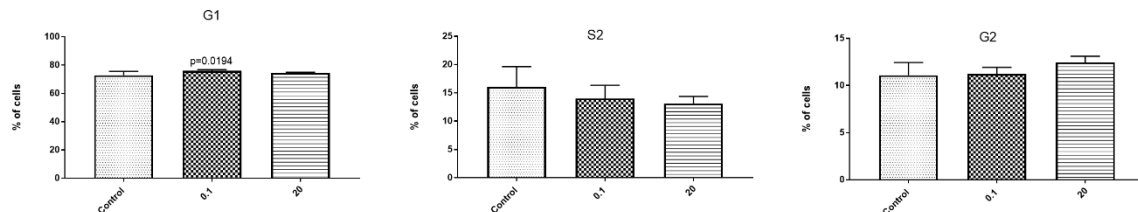

Figure S20. Impact of JAM-E (ethanolic extract of microwave-dried sample from plants elicited with 10  $\mu$ M of jasmonic acid) on cytotoxicity (MTT and NR method), type of cell death (Annex V and PI test) and individual phases of the cell cycle of the healthy prostate epithelial cells (HPrEC ATCC® PCS-440-010™ cell line).



## MTT

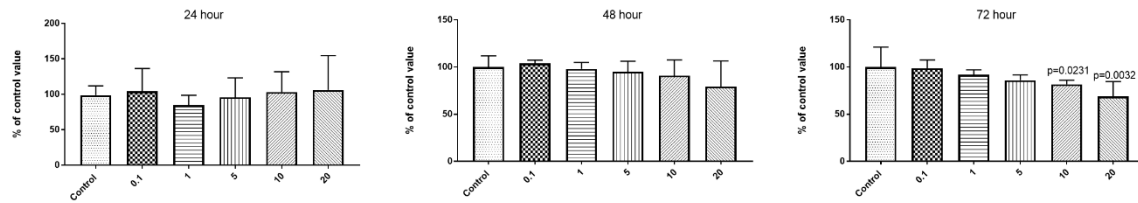

## NR

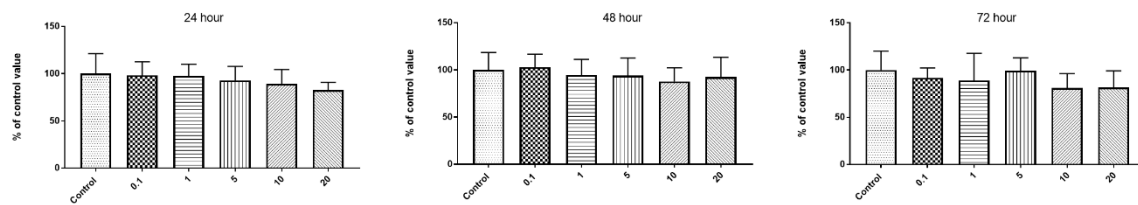

## Viability

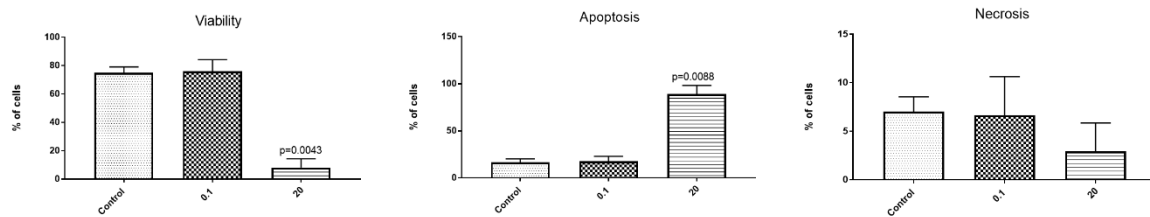

## Cell Cycle

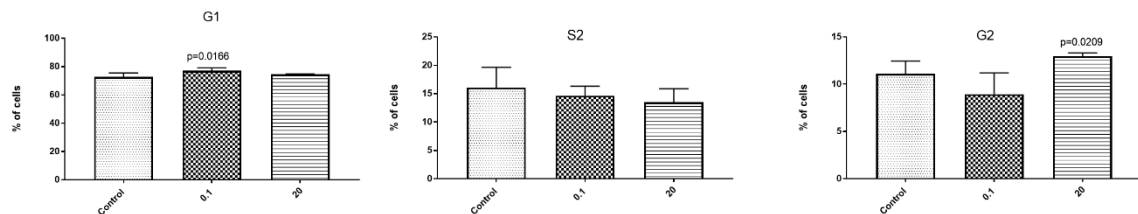

Figure S21. Impact of YEM-E (ethanolic extract of microwave-dried sample from plants elicited with 0.1% yeast extract) on cytotoxicity (MTT and NR method), type of cell death (Annex V and PI test) and individual phases of the cell cycle of the healthy prostate epithelial cells (HPrEC ATCC® PCS-440-010™ cell line).

## MTT

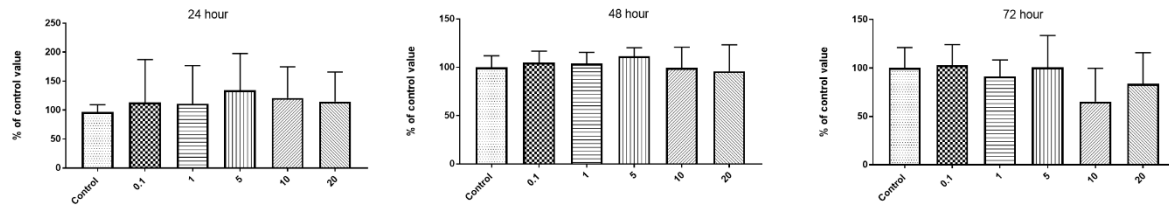

## NR

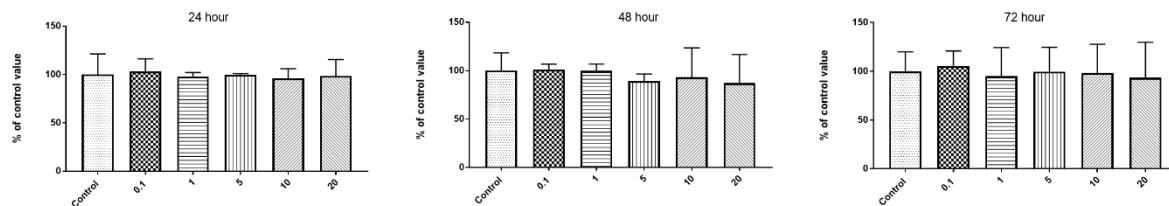

## Viability

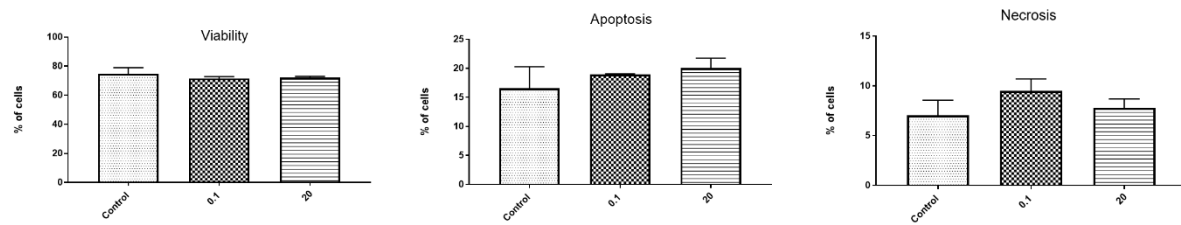

## Cell Cycle

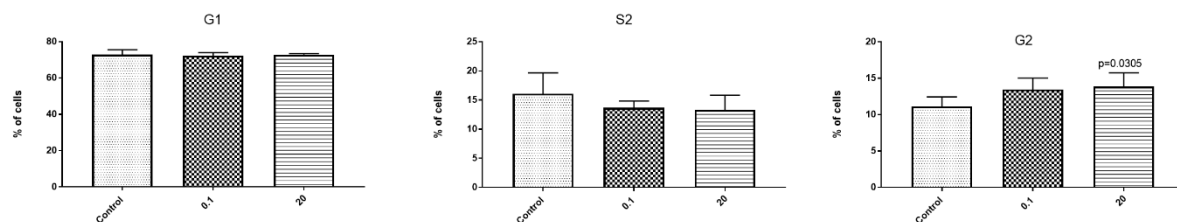

Figure S22. Impact of CM-GD extract (sample after the *in vitro* digestion of control microwave-dried sample) on cytotoxicity (MTT and NR method), type of cell death (Annex V and PI test) and individual phases of the cell cycle of the healthy prostate epithelial cells (HPrEC ATCC® PCS-440-010™ cell line).

## MTT

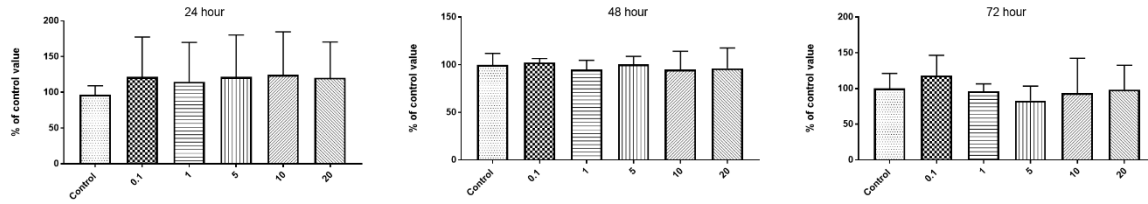

## NR

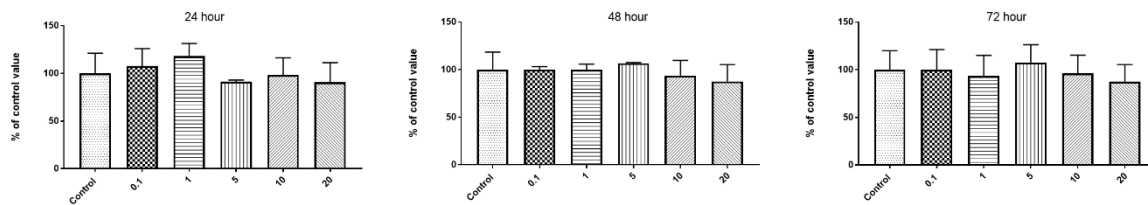

## Viability

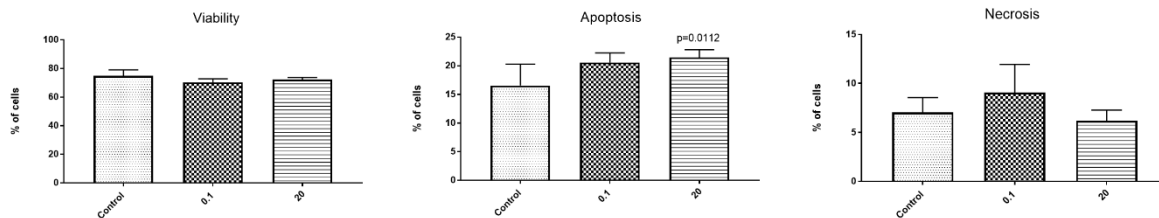

## Cell Cycle

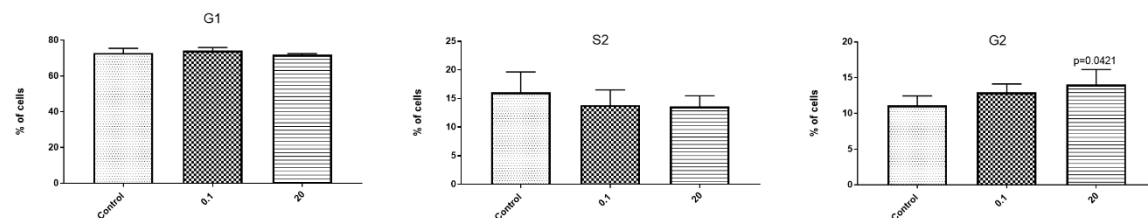

Figure S23. Impact of JAM-GD (sample after the *in vitro* digestion of microwave-dried sample from plants elicited with 10  $\mu$ M of jasmonic acid) on cytotoxicity (MTT and NR method), type of cell death (Annex V and PI test) and individual phases of the cell cycle of the healthy prostate epithelial cells (HPrEC ATCC<sup>®</sup> PCS-440-010<sup>™</sup> cell line).

## MTT

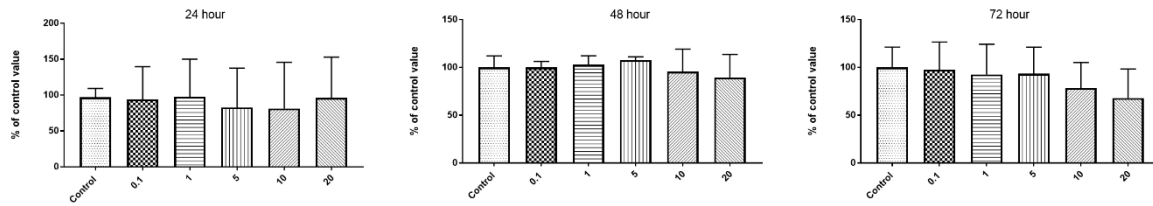

## NR

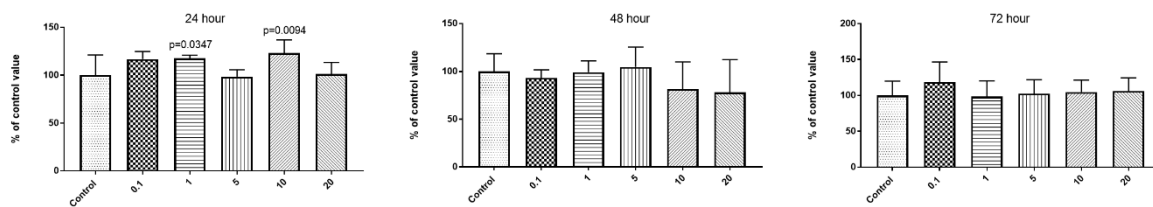

## Viability

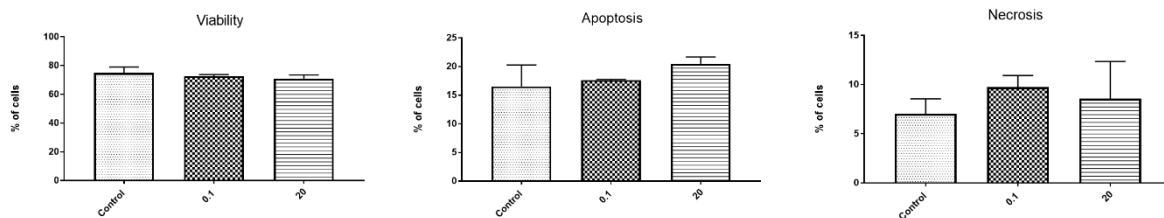

## Cell Cycle

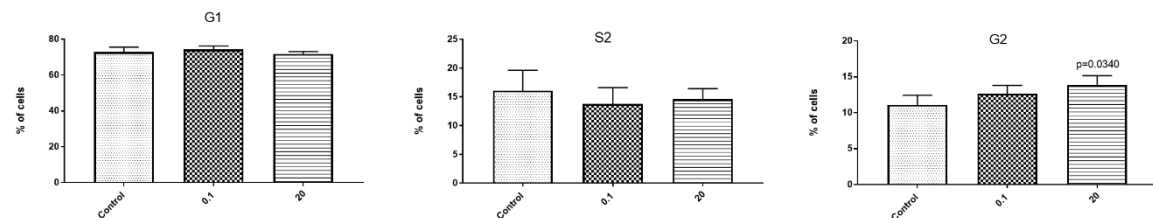

Figure S24. Impact of YEM -GD extract (sample after the *in vitro* digestion of microwave-dried sample from plants elicited with 0.1% yeast extract) on cytotoxicity (MTT and NR method), type of cell death (Annex V and PI test) and individual phases of the cell cycle of the healthy prostate epithelial cells (HPrEC ATCC® PCS-440-010™ cell line).

## MTT

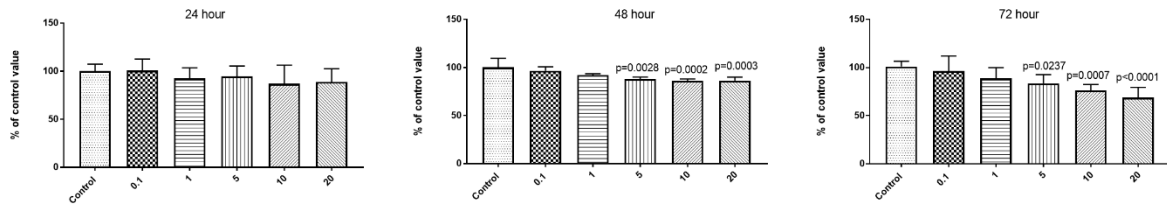

## NR

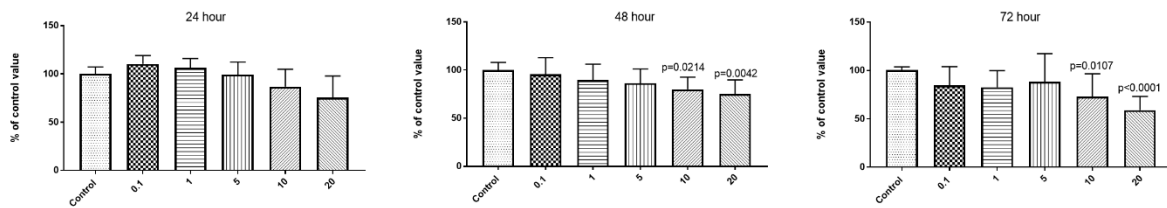

## Viability

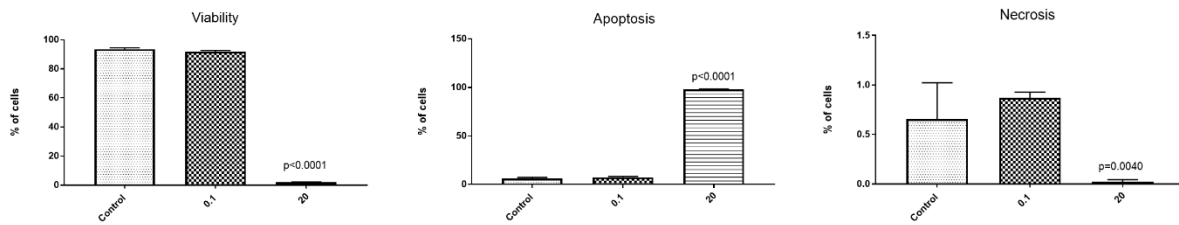

## Cell Cycle

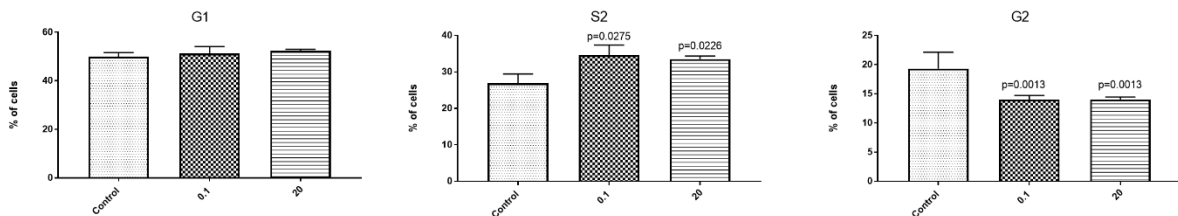

Figure S25. Impact of CM-E (ethanolic extract of control microwave-dried sample) on cytotoxicity (MTT and NR method), type of cell death (Annex V and PI test) and individual phases of the cancer gastric epithelial NCI-N87 (ATCC® CRL5822™) cell line.

## MTT

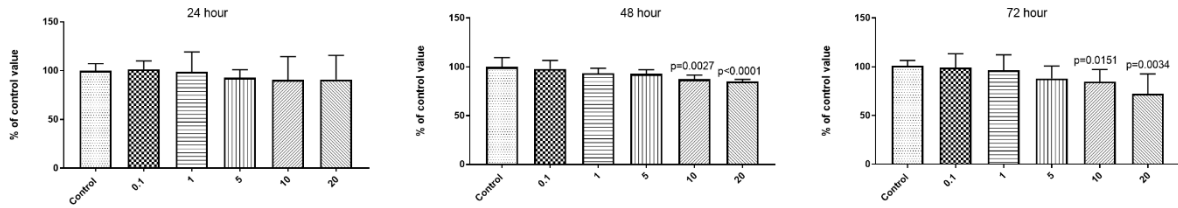

## NR

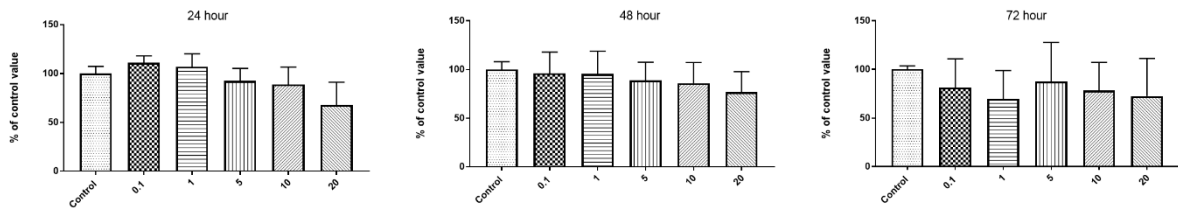

## Viability

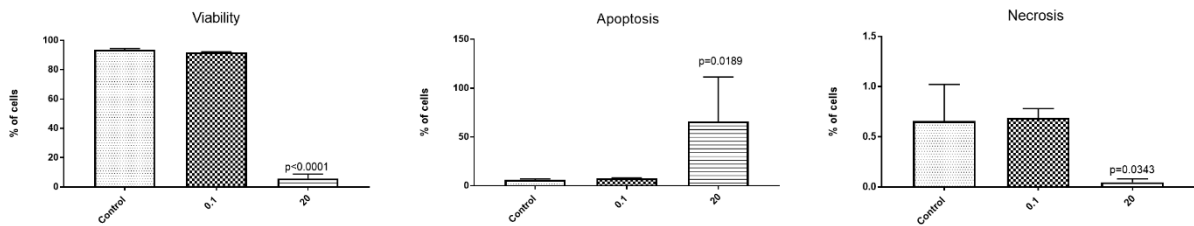

## Cell Cycle

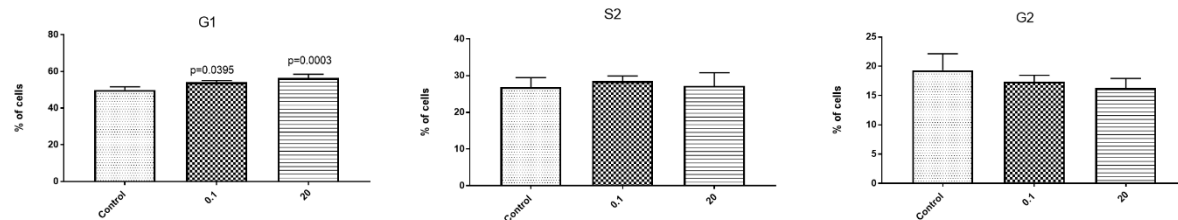

Figure S26. Impact of JAM-E (ethanolic extract of microwave-dried sample from plants elicited with 10  $\mu$ M of jasmonic acid) on cytotoxicity (MTT and NR method), type of cell death (Annex V and PI test) and individual phases of the cancer gastric epithelial NCI-N87 (ATCC® CRL5822™) cell line.

## MTT

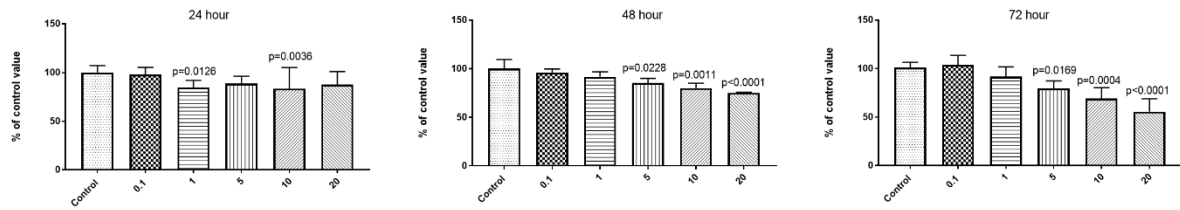

## NR

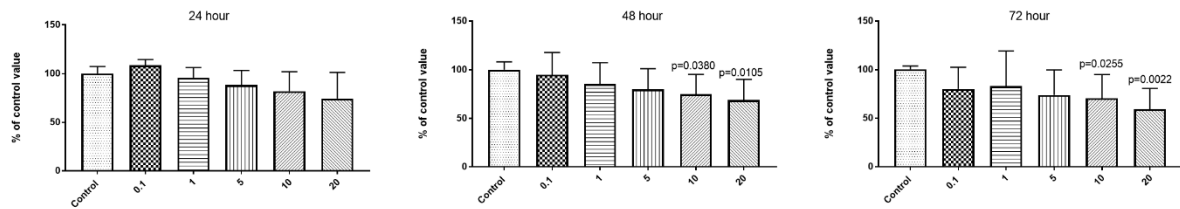

## Viability

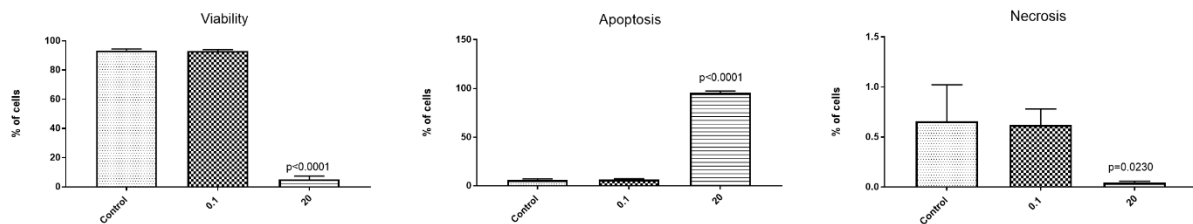

## Cell Cycle

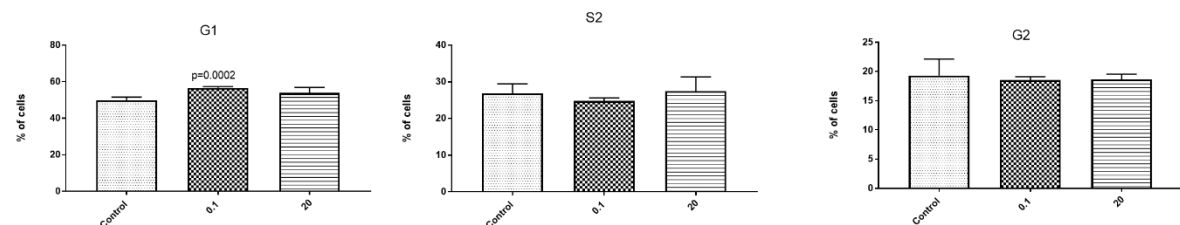

Figure S27. Impact of YEM-E (ethanolic extract of microwave-dried sample from plants elicited with 0.1% yeast extract) on cytotoxicity (MTT and NR method), type of cell death (Annex V and PI test) and individual phases of the cancer gastric epithelial NCI-N87 (ATCC® CRL5822™) cell line.

## MTT

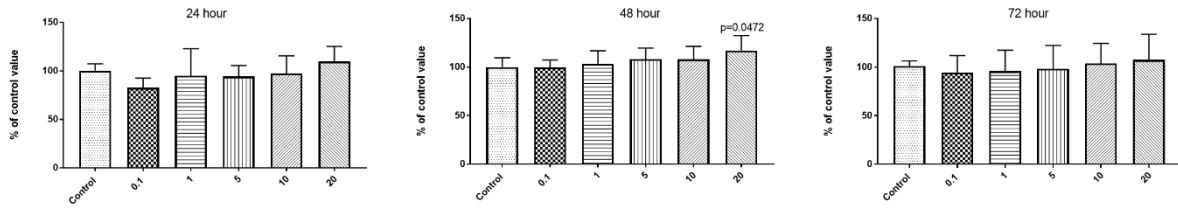

## NR

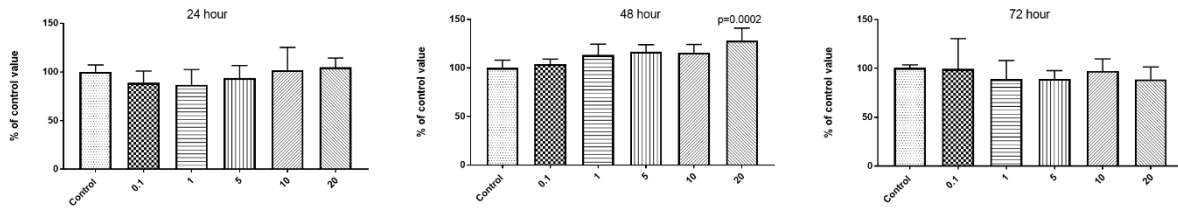

## Viability

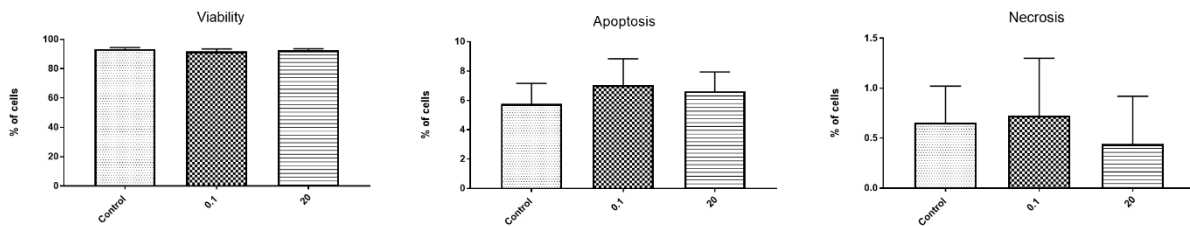

## Cell Cycle

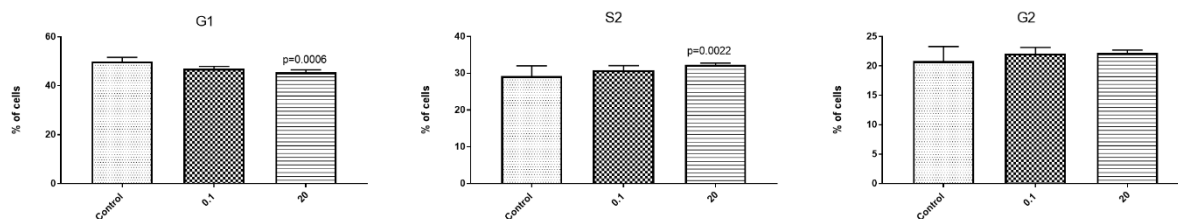

Figure S28. Impact of CM -GD extract (sample after the *in vitro* digestion of control microwave-dried sample) on cytotoxicity (MTT and NR method), type of cell death (Annex V and PI test) and individual phases of the cancer gastric epithelial NCI-N87 (ATCC® CRL5822™) cell line.



## MTT

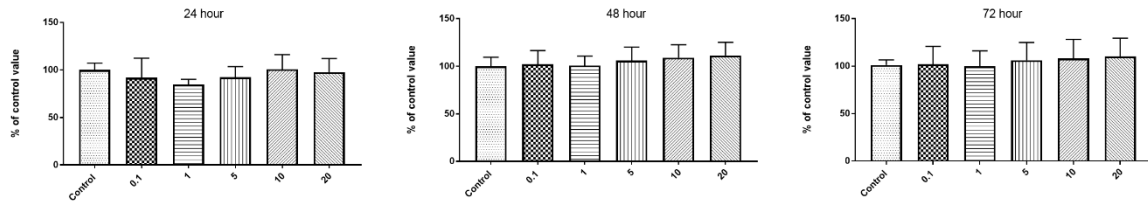

## NR

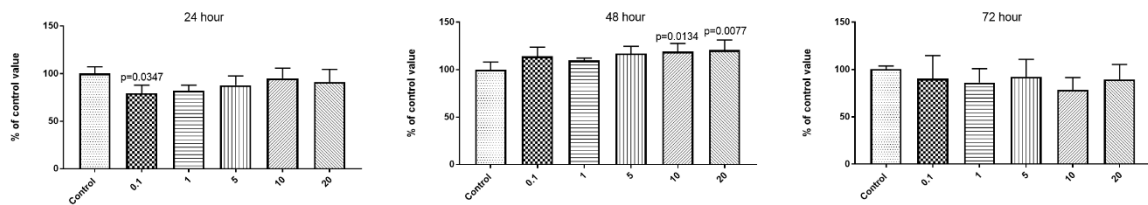

## Viability

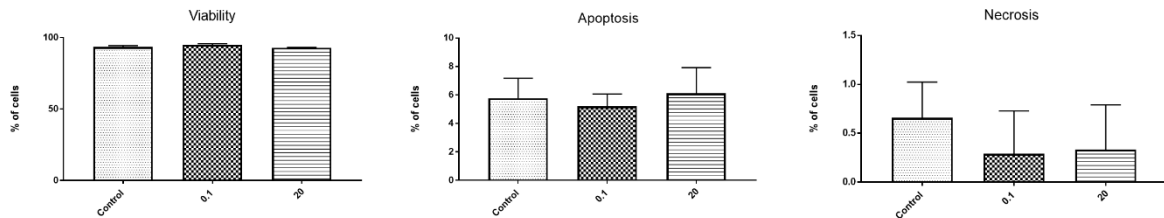

## Cell Cycle

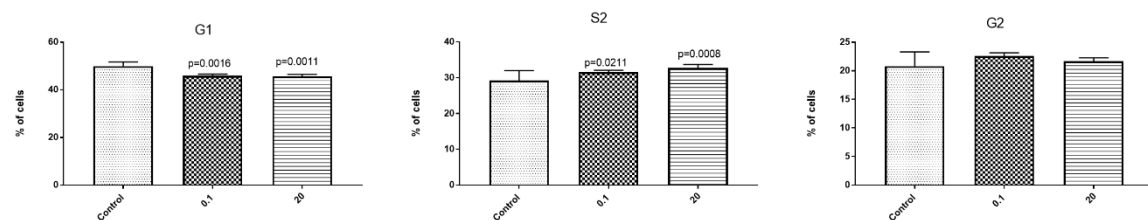

Figure S29. Impact of JAM -GD extract (sample after the *in vitro* digestion of microwave-dried sample from plants elicited with 10  $\mu$ M of jasmonic acid) on cytotoxicity (MTT and NR method), type of cell death (Annex V and PI test) and individual phases of the cancer gastric epithelial NCI-N87 (ATCC® CRL5822™) cell line.

## MTT

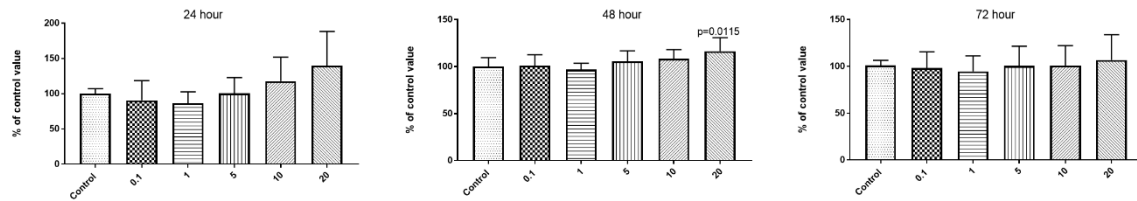

## NR

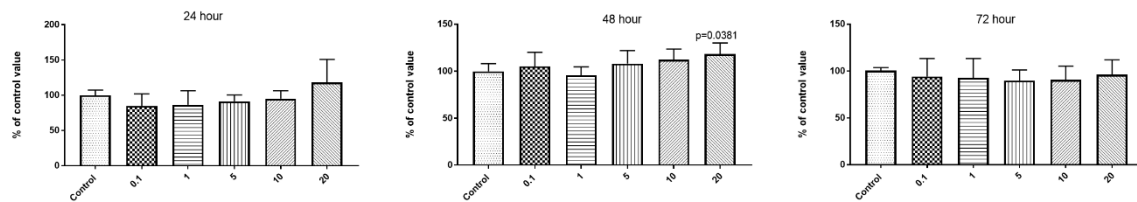

## Viability

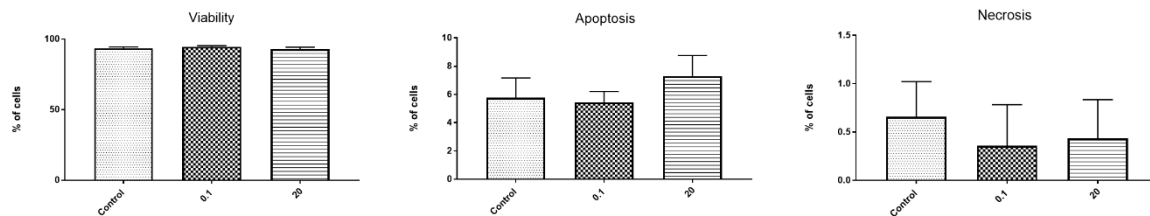

## Cell Cycle

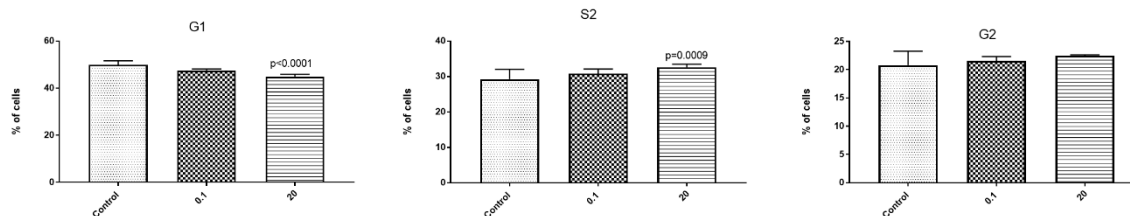

Figure S30. Impact of YEM -GD extract (sample after the *in vitro* digestion of microwave-dried sample from plants elicited with 0.1% yeast extract) on cytotoxicity (MTT and NR method), type of cell death (Annex V and PI test) and individual phases of the cancer gastric epithelial NCI-N87 (ATCC® CRL5822™) cell line.

## MTT

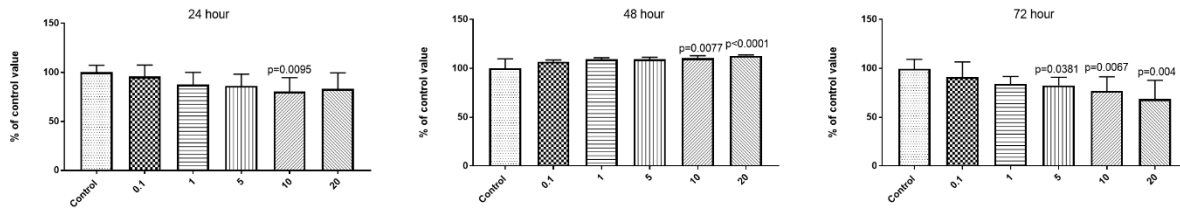

## NR

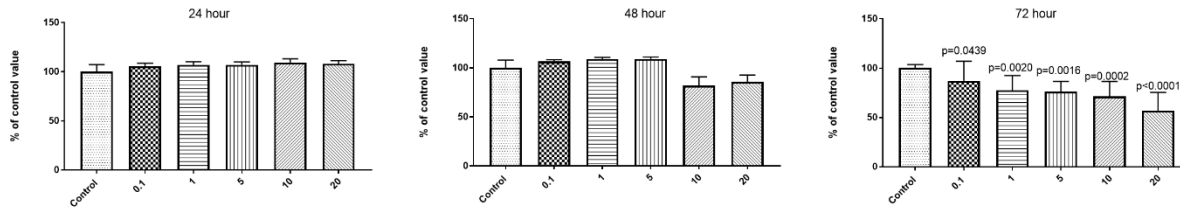

## Viability

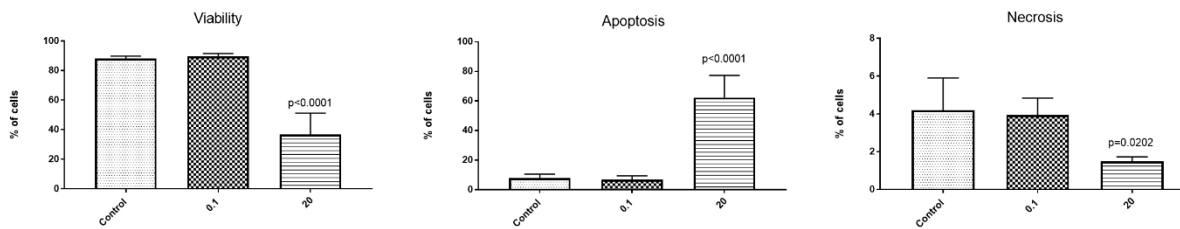

## Cell Cycle

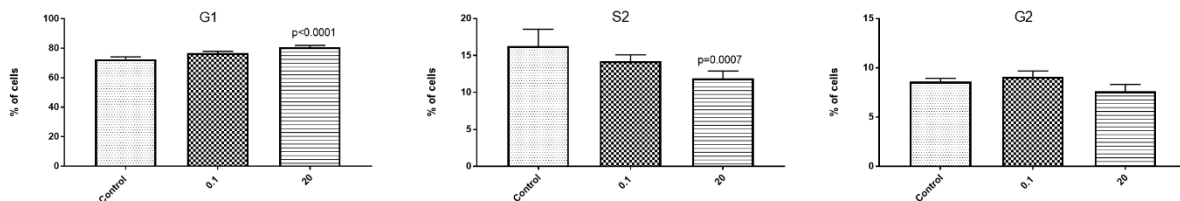

Figure S31. Impact of CM-E (ethanolic extract of control microwave-dried sample) on cytotoxicity (MTT and NR method), type of cell death (Annex V and PI test) and individual phases of the prostate cancer line VCaP – (ATCC® CRL-2876™).

## MTT

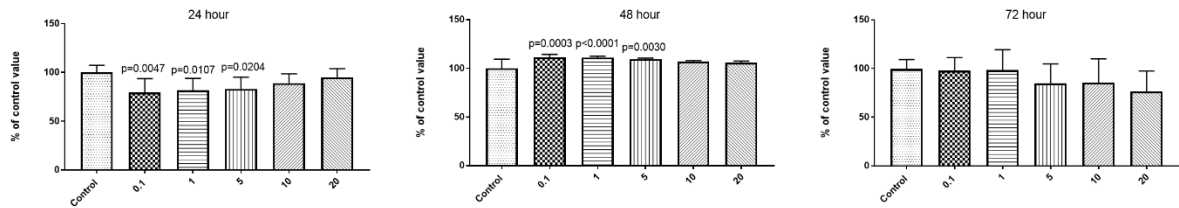

## NR

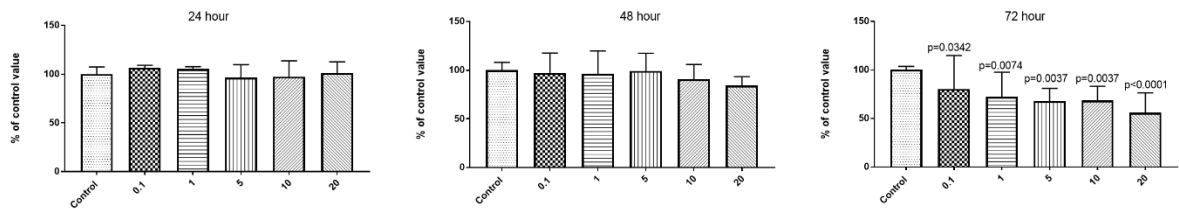

## Viability

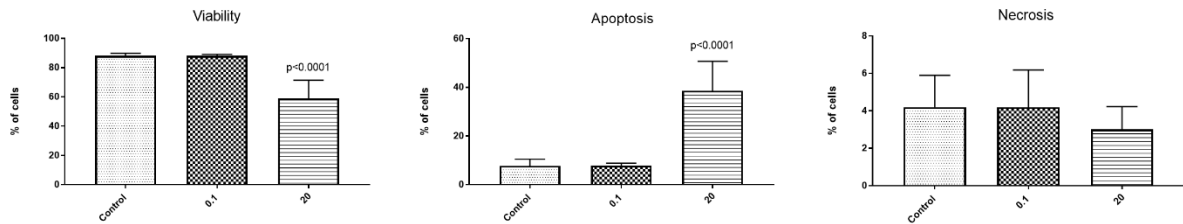

## Cell Cycle

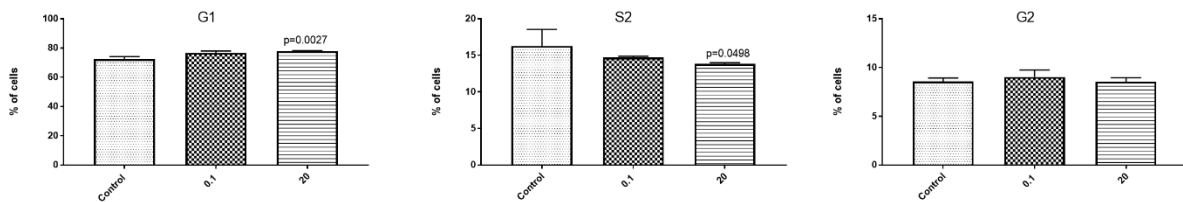

Figure S32. Impact of JAM-E (ethanolic extract of microwave-dried sample from plants elicited with 10  $\mu$ M of jasmonic acid) on cytotoxicity (MTT and NR method), type of cell death (Annex V and PI test) and individual phases of the prostate cancer line VCaP – (ATCC® CRL-2876™).

## MTT

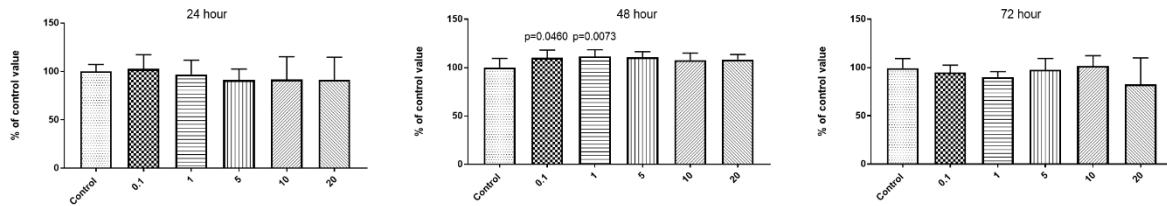

## NR

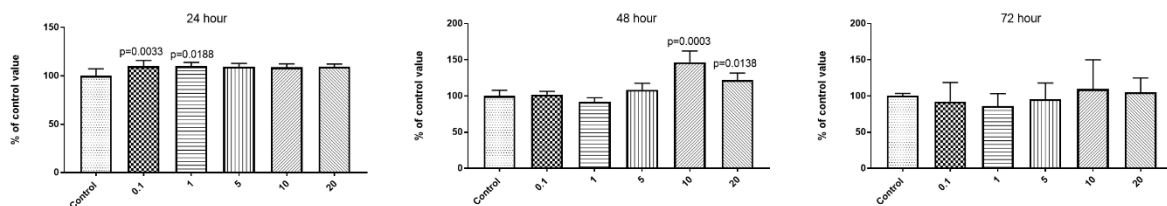

## Viability

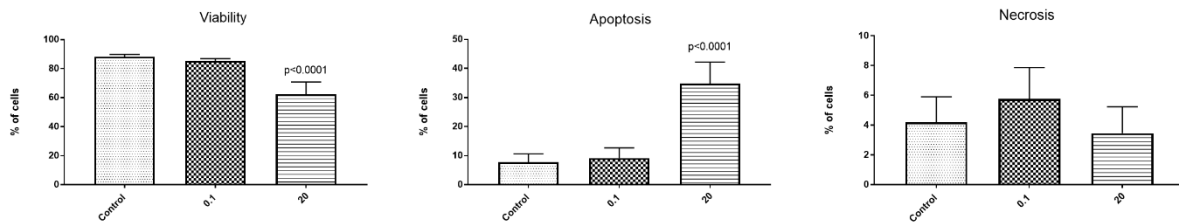

## Cell Cycle

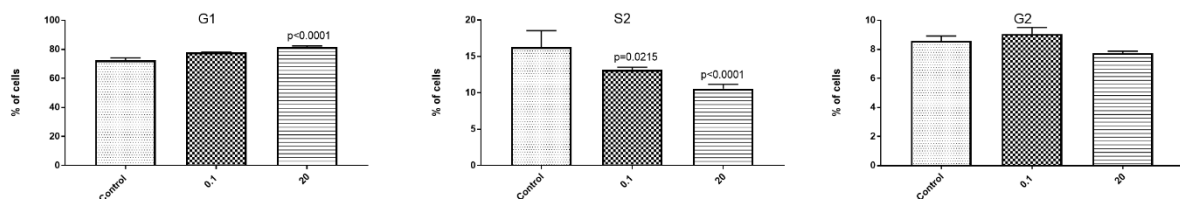

Figure S33. Impact of YEM-E (ethanolic extract of microwave-dried sample from plants elicited with 0.1% yeast extract) on cytotoxicity (MTT and NR method), type of cell death (Annex V and PI test) and individual phases of the prostate cancer line VCaP – (ATCC® CRL-2876™).

## MTT

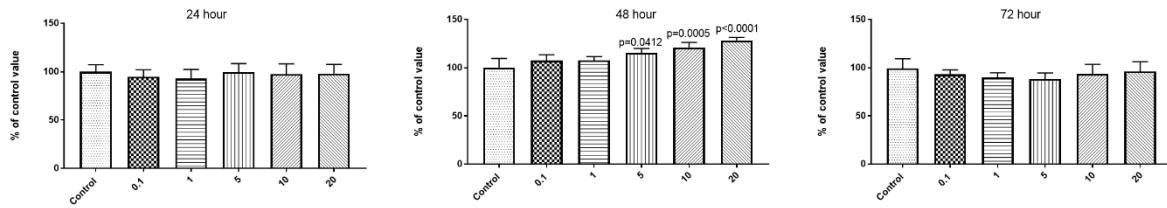

## NR

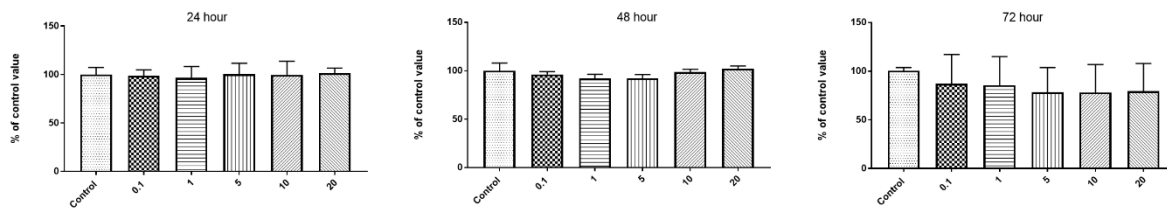

## Viability

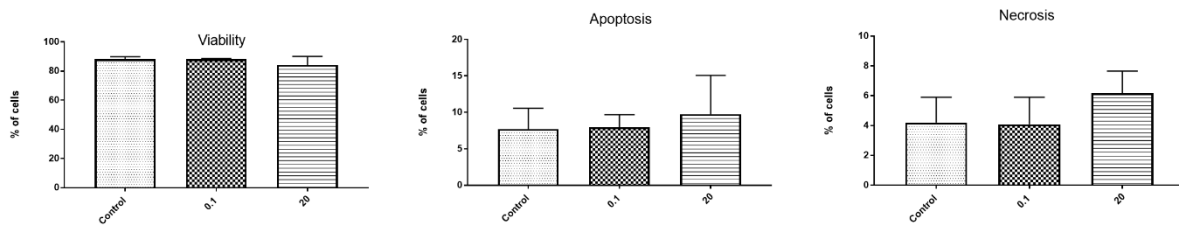

## Cell Cycle

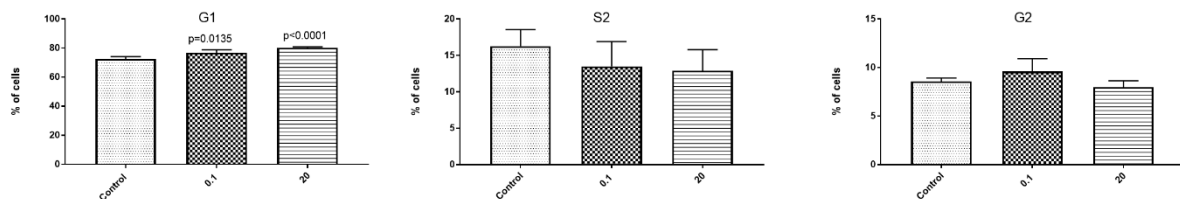

Figure S34. Impact of CM-GD extract (sample after the *in vitro* digestion of control microwave-dried sample) on cytotoxicity (MTT and NR method), type of cell death (Annex V and PI test) and individual phases of the prostate cancer line VCaP – (ATCC® CRL-2876™).

## MTT

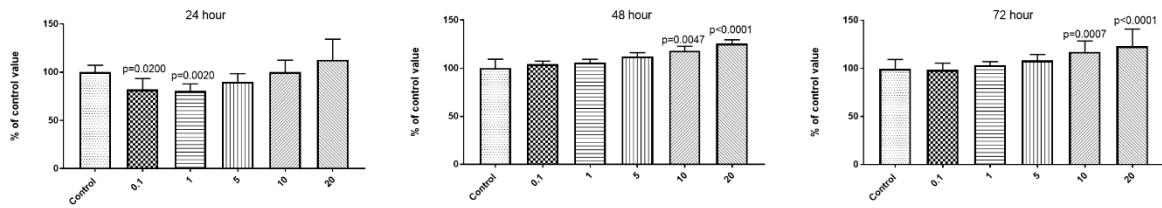

## NR

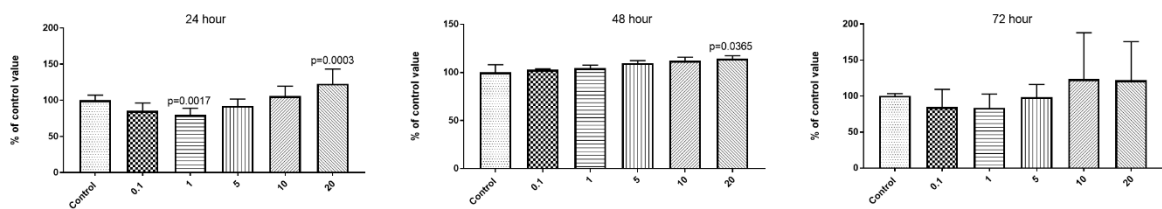

## Viability

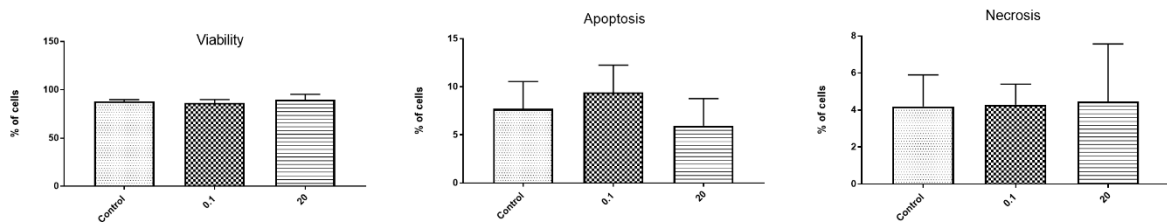

## Cell Cycle

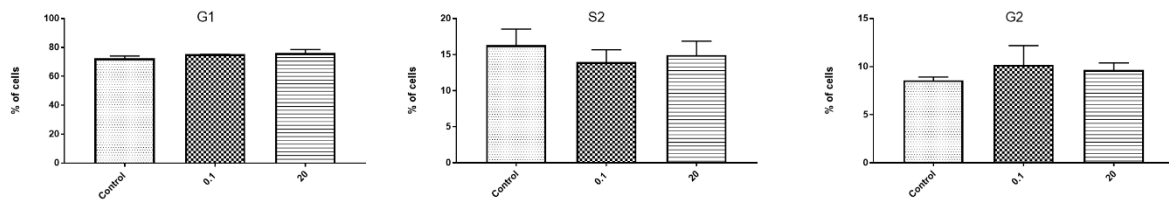

Figure S35. Impact of JAM -GD extract (sample after the *in vitro* digestion of microwave-dried sample from plants elicited with 10  $\mu$ M of jasmonic acid) on cytotoxicity (MTT and NR method), type of cell death (Annex V and PI test) and individual phases of the prostate cancer line VCaP – (ATCC® CRL-2876™).

## MTT

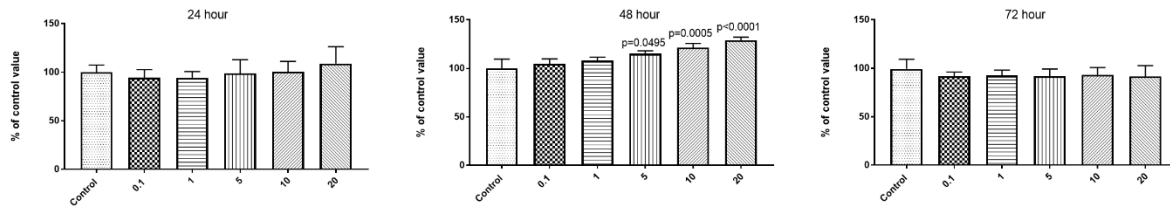

## NR

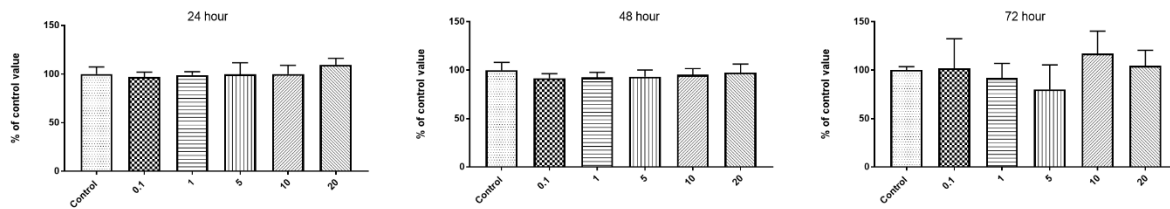

## Viability

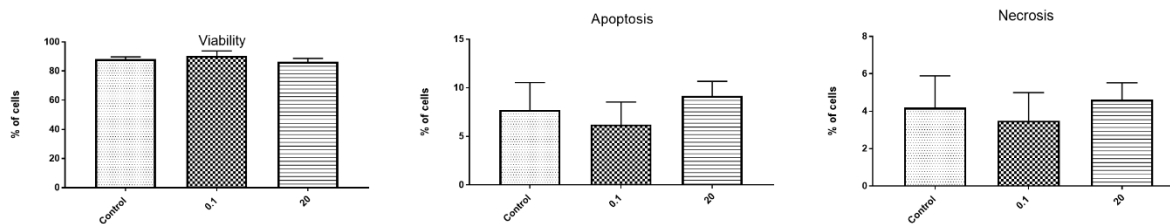

## Cell Cycle

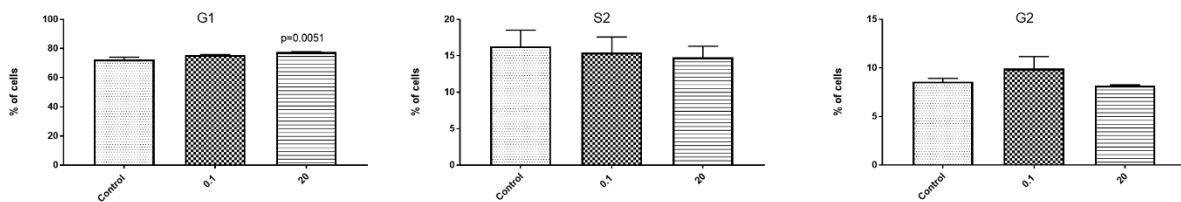

Figure S36. Impact of YEM -GD extract (sample after the *in vitro* digestion of microwave-dried sample from plants elicited with 0.1% yeast extract) on cytotoxicity (MTT and NR method), type of cell death (Annex V and PI test) and individual phases of the prostate cancer line VCaP – (ATCC® CRL-2876™).



## MTT

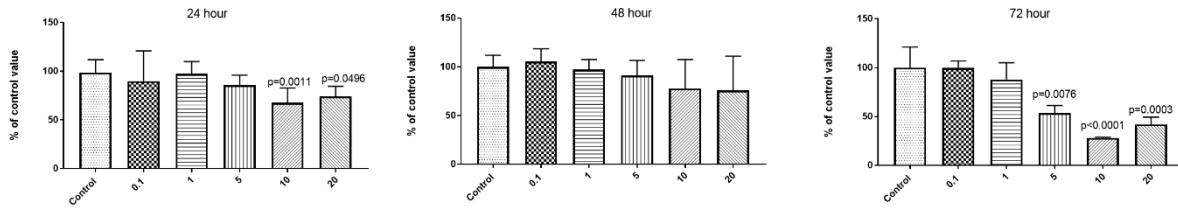

## NR

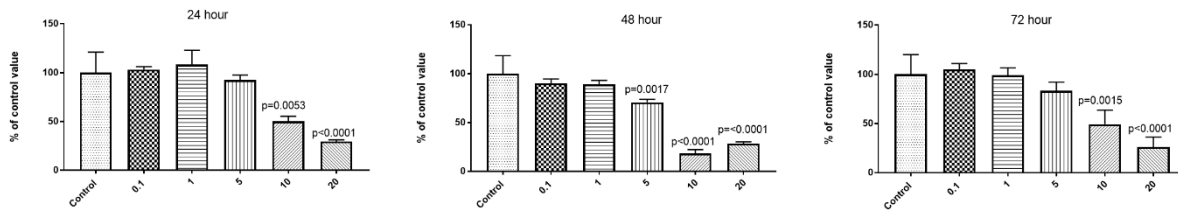

## Viability

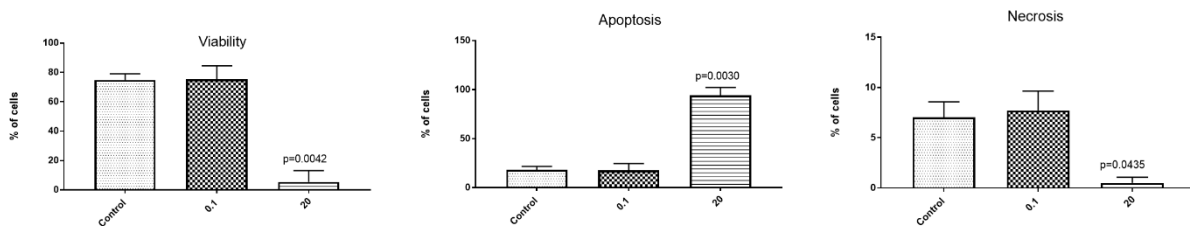

## Cell Cycle

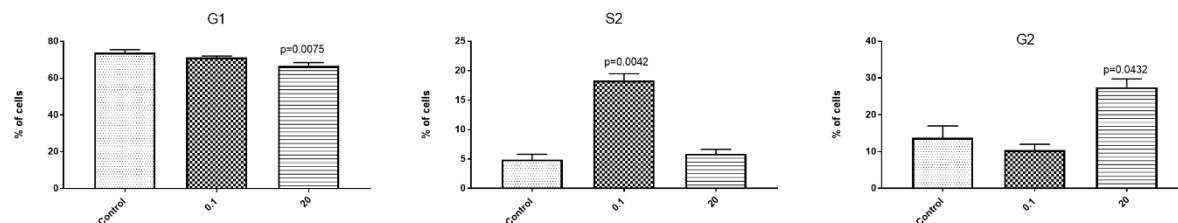

Figure S37. Impact of CT-E (ethanolic extract of control traditionally-dried sample) on cytotoxicity (MTT and NR method), type of cell death (Annex V and PI test) and individual phases of the cell cycle of the healthy prostate epithelial cells (HPrEC ATCC® PCS-440-010™ cell line).

## MTT

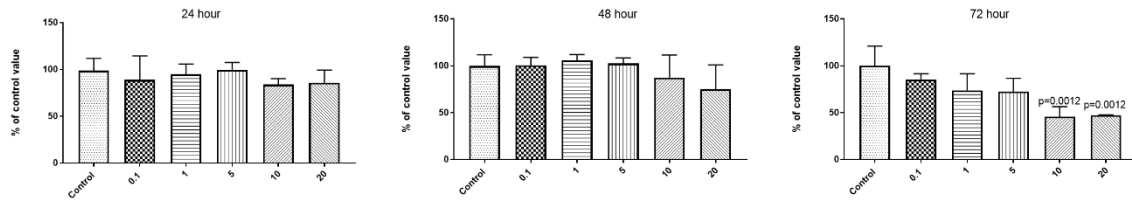

## NR

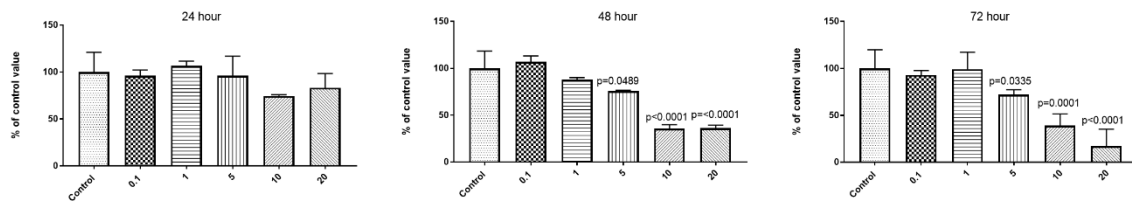

## Viability

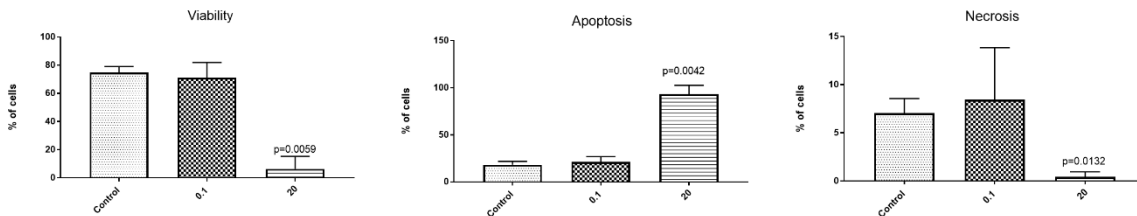

## Cell Cycle

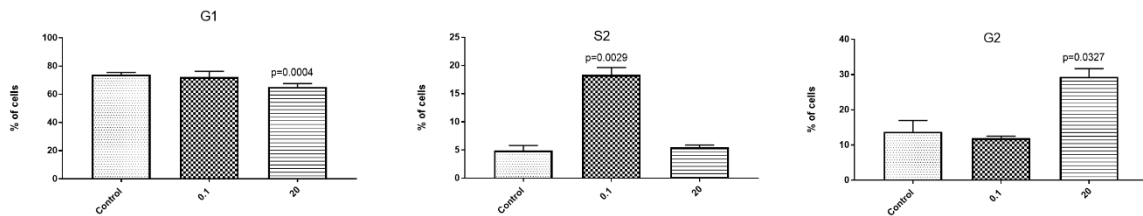

Figure S38. Impact of JAT-E (ethanolic extract of traditionally-dried sample from plants elicited with 10  $\mu\text{M}$  of jasmonic acid) on cytotoxicity (MTT and NR method), type of cell death (Annex V and PI test) and individual phases of the cell cycle of the healthy prostate epithelial cells (HPrEC ATCC® PCS-440-010™ cell line).

## MTT

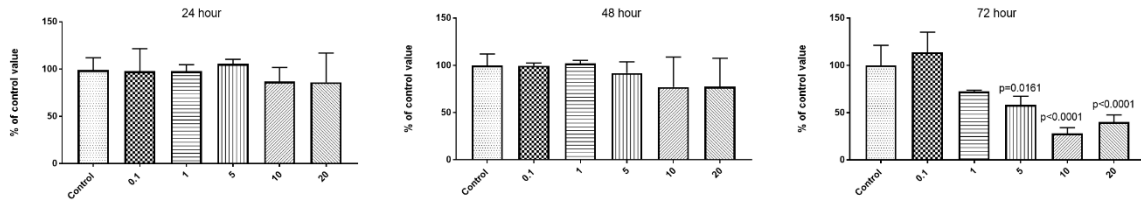

## NR

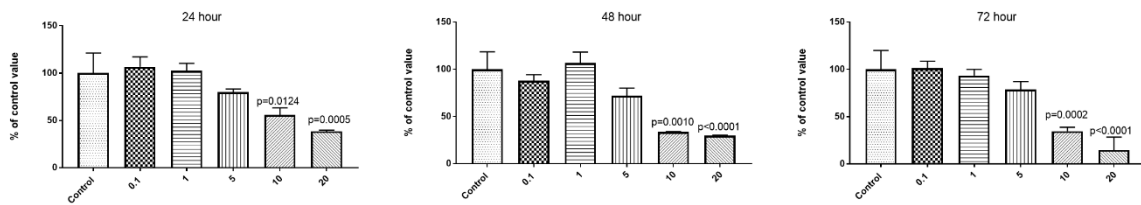

## Viability

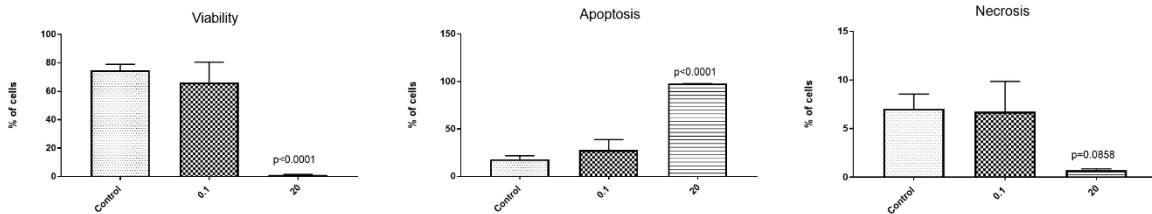

## Cell Cycle

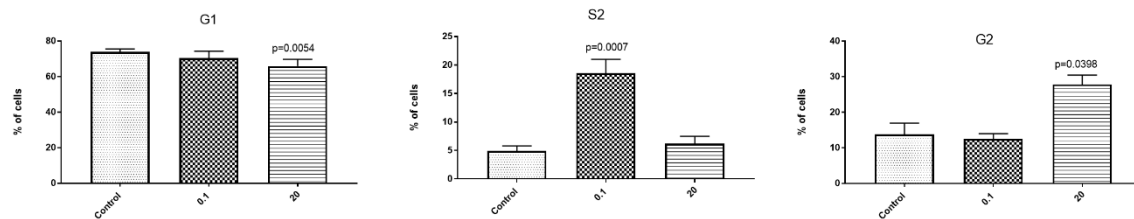

Figure S39. Impact of YET-E (ethanolic extract of traditionally-dried sample from plants elicited with 0.1% yeast extract) on cytotoxicity (MTT and NR method), type of cell death (Annex V and PI test) and individual phases of the cell cycle of the healthy prostate epithelial cells (HPrEC ATCC® PCS-440-010™ cell line).

## MTT

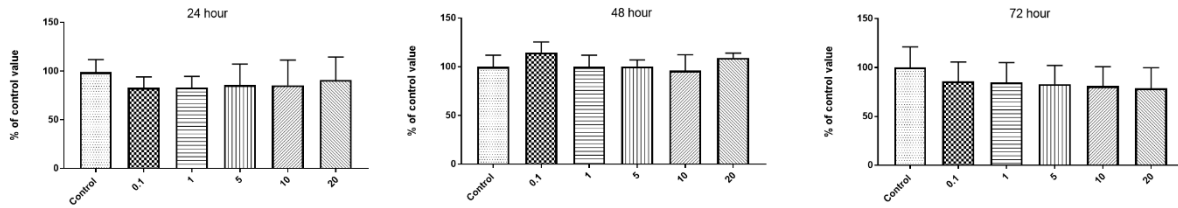

## NR

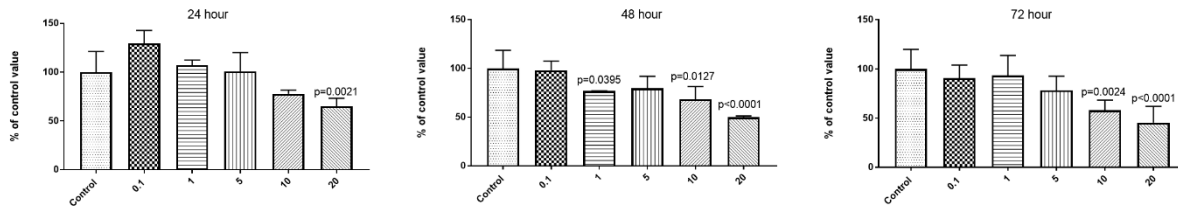

## Viability

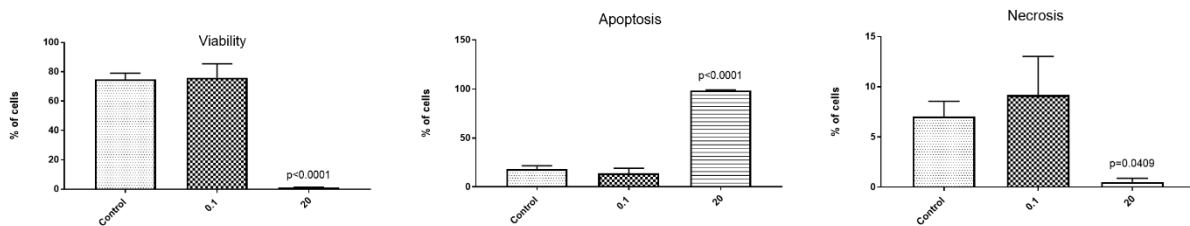

## Cell Cycle

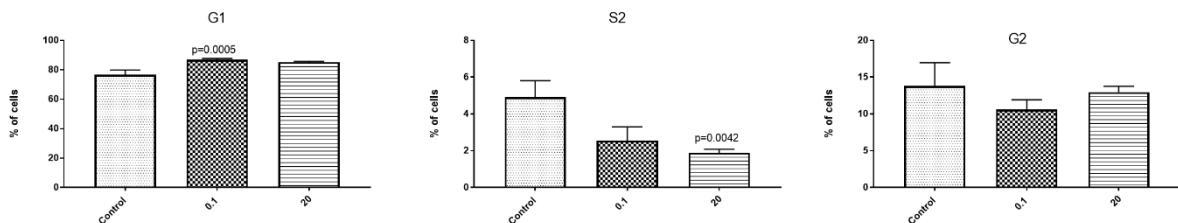

Figure S40. Impact of CT-GD extract (sample after the *in vitro* digestion of control traditionally-dried sample) on cytotoxicity (MTT and NR method), type of cell death (Annex V and PI test) and individual phases of the cell cycle of the healthy prostate epithelial cells (HPrEC ATCC® PCS-440-010™ cell line).

## MTT

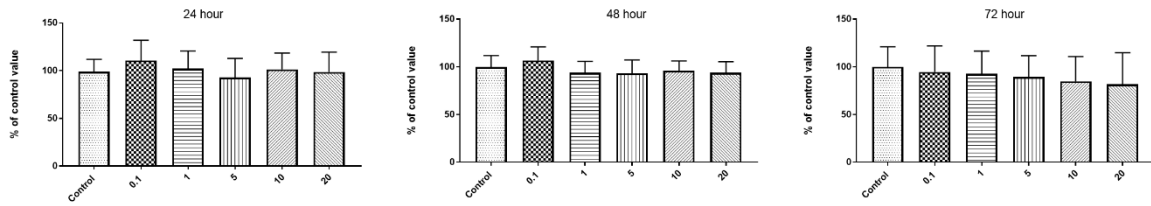

## NR

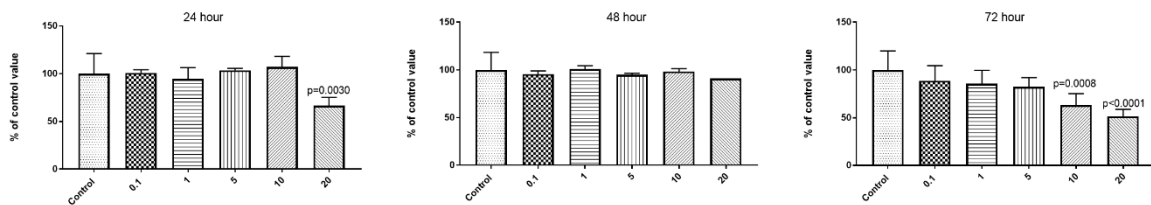

## Viability

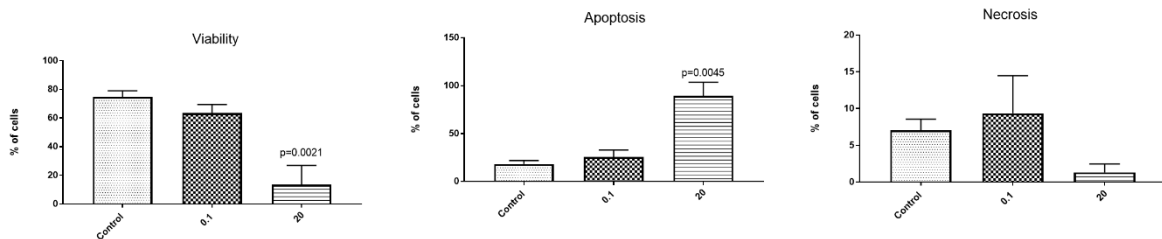

## Cell Cycle

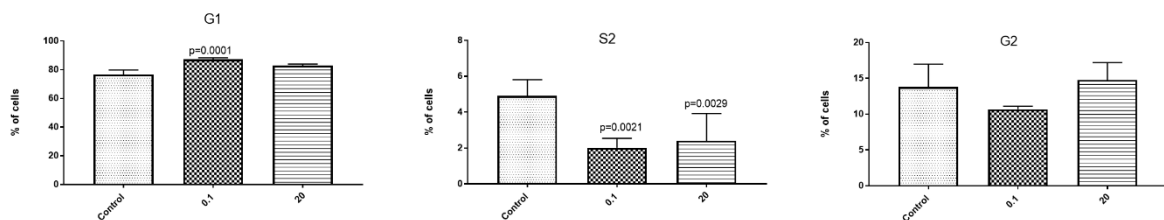

Figure S41. Impact of JAT-GD (sample after the *in vitro* digestion of traditionally-dried sample from plants elicited with 10 μM of jasmonic acid) on cytotoxicity (MTT and NR method), type of cell death (Annex V and PI test) and individual phases of the cell cycle of the healthy prostate epithelial cells (HPrEC ATCC® PCS-440-010™ cell line).

## MTT

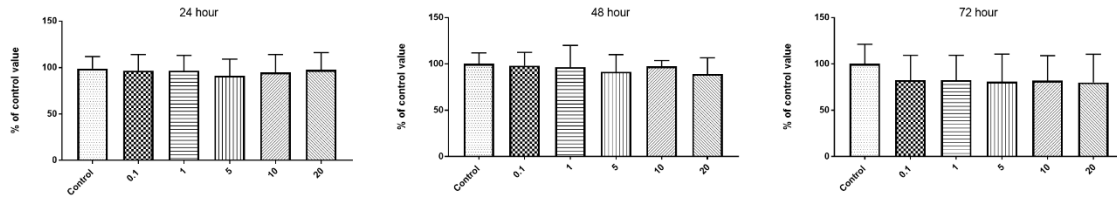

## NR

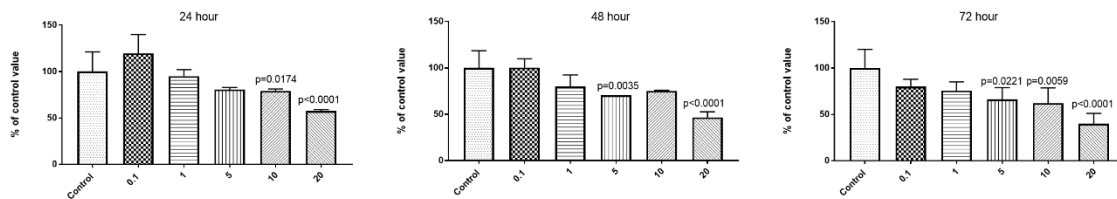

## Viability

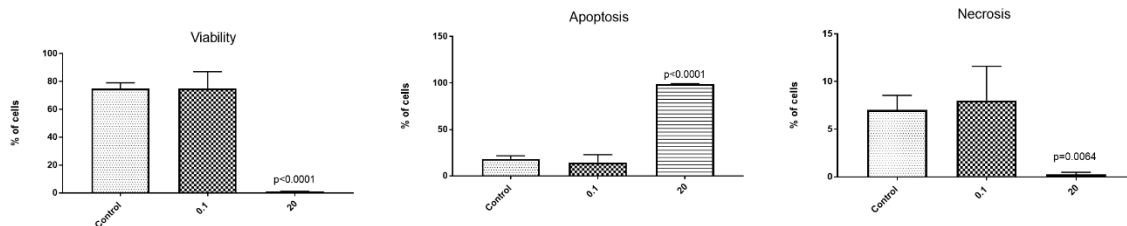

## Cell Cycle

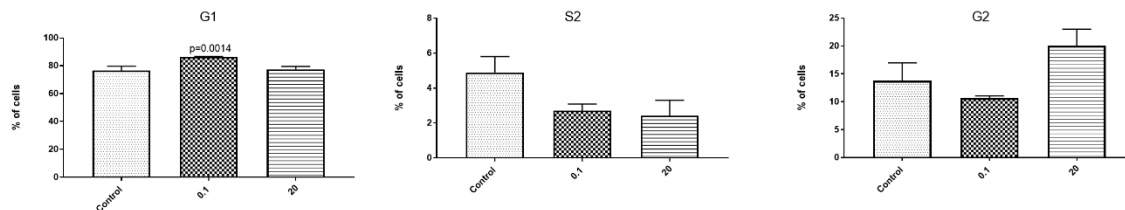

Figure S42. Impact of YET -GD extract (sample after the *in vitro* digestion of traditionally-dried sample from plants elicited with 0.1% yeast extract) on cytotoxicity (MTT and NR method), type of cell death (Annex V and PI test) and individual phases of the cell cycle of the healthy prostate epithelial cells (HPrEC ATCC® PCS-440-010™ cell line).

## MTT

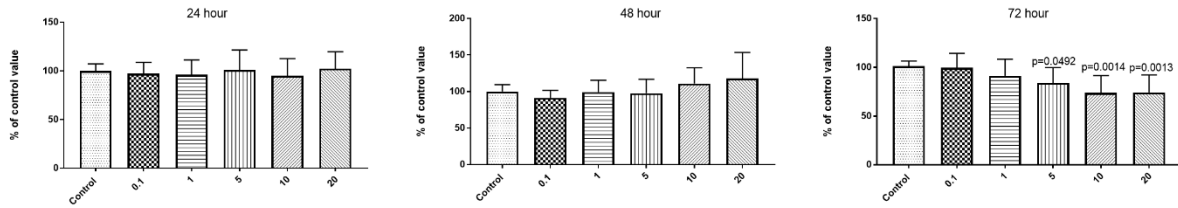

## NR

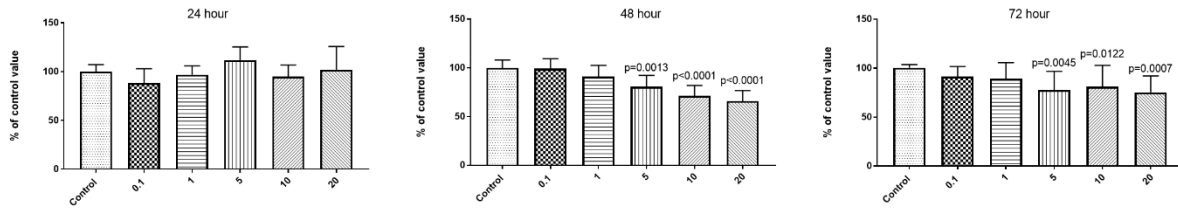

## Viability

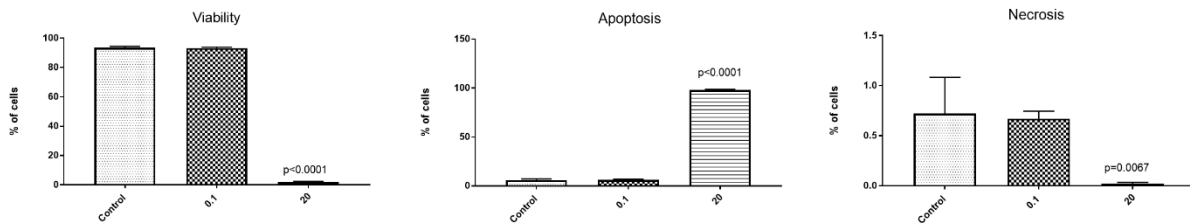

## Cell Cycle

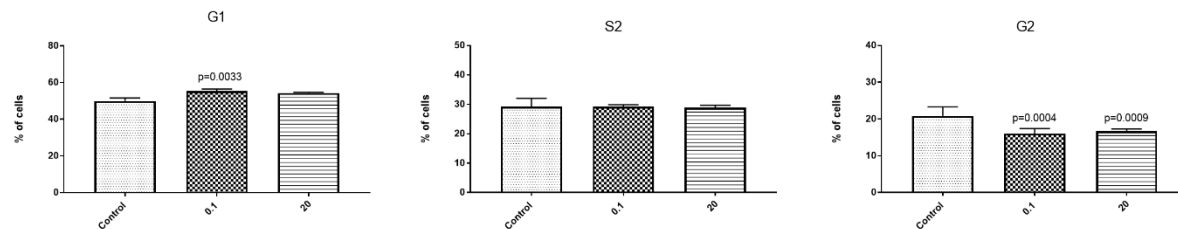

Figure S43. Impact of CT-E (ethanolic extract of control traditionally-dried sample) on cytotoxicity (MTT and NR method), type of cell death (Annex V and PI test) and individual phases of the cancer gastric epithelial NCI-N87 (ATCC® CRL5822™) cell line.

## MTT

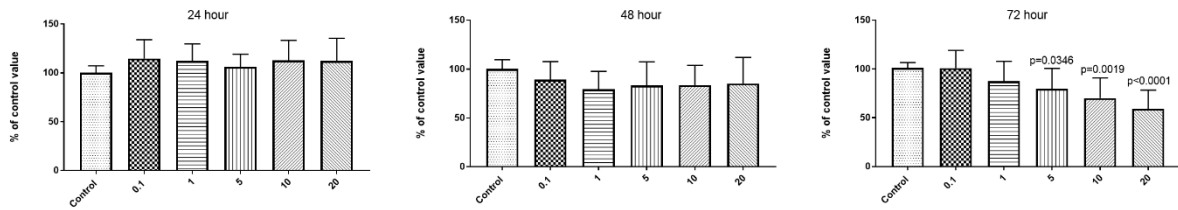

## NR

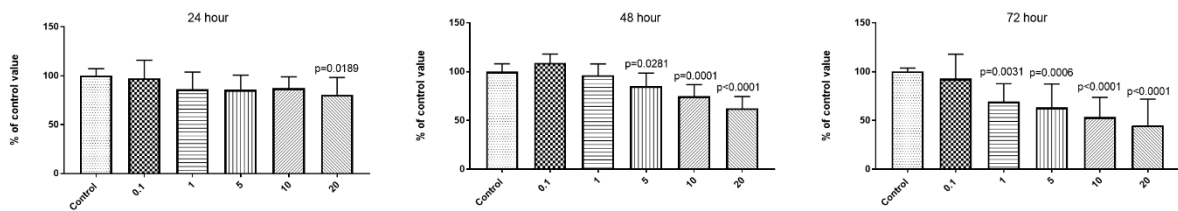

## Viability

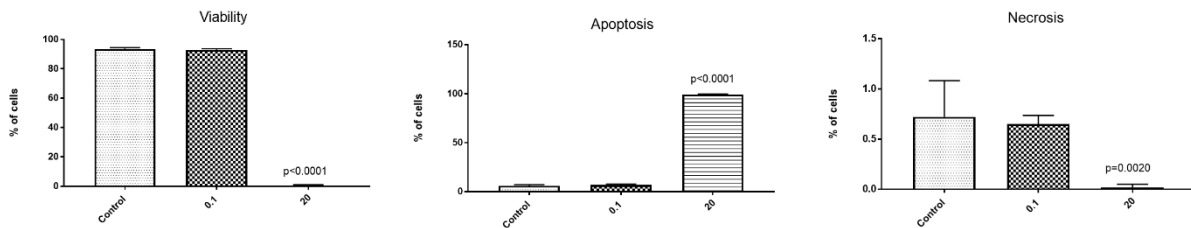

## Cell Cycle

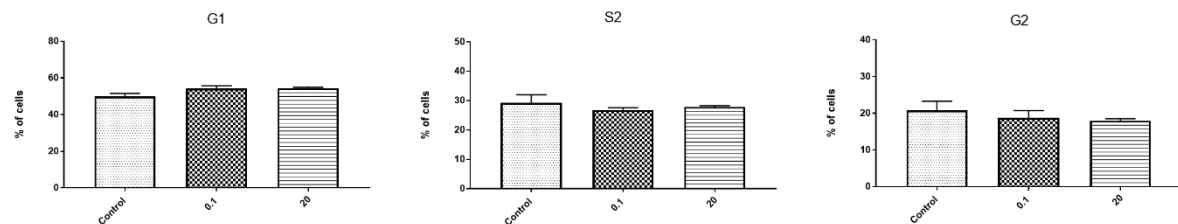

Figure S44. Impact of JAT-E (ethanolic extract of traditionally-dried sample from plants elicited with 10 μM of jasmonic acid) on cytotoxicity (MTT and NR method), type of cell death (Annex V and PI test) and individual phases of the cancer gastric epithelial NCI-N87 (ATCC® CRL5822™) cell line.



## MTT

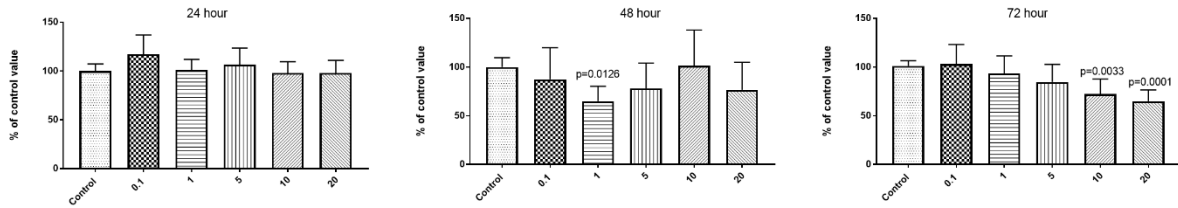

## NR

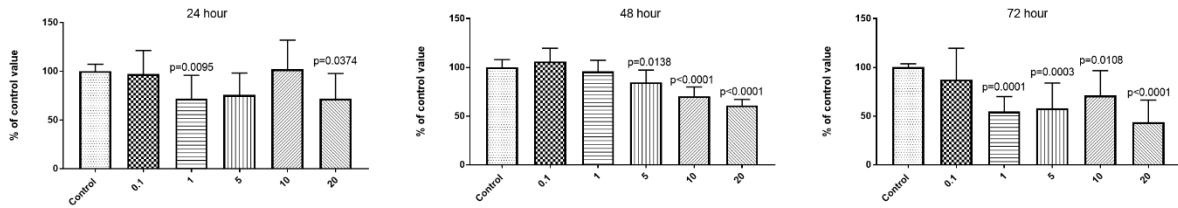

## Viability

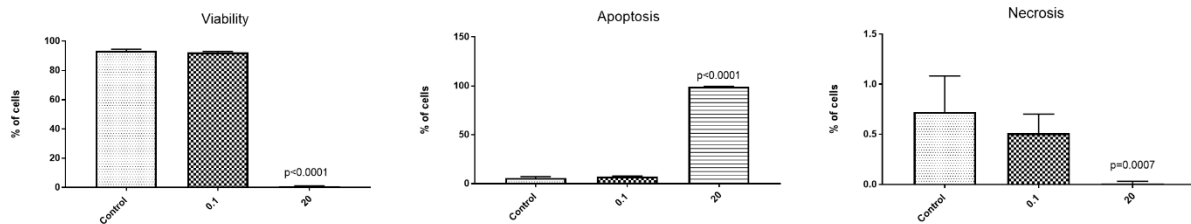

## Cell Cycle

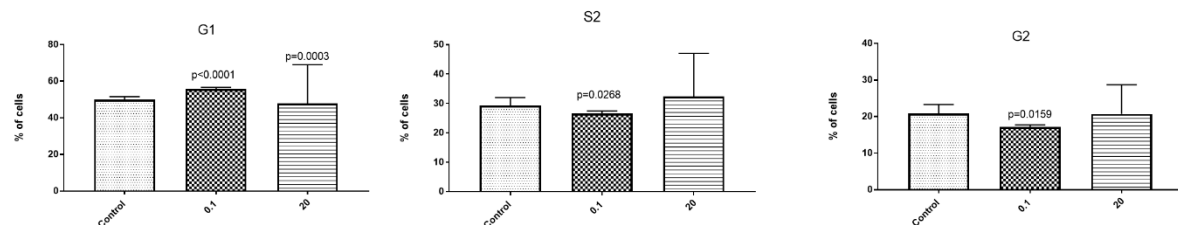

Figure S45. Impact of YET-E (ethanolic extract of traditionally-dried sample from plants elicited with 0.1% yeast extract) on cytotoxicity (MTT and NR method), type of cell death (Annex V and PI test) and individual phases of the cancer gastric epithelial NCI-N87 (ATCC® CRL5822™) cell line.

## MTT

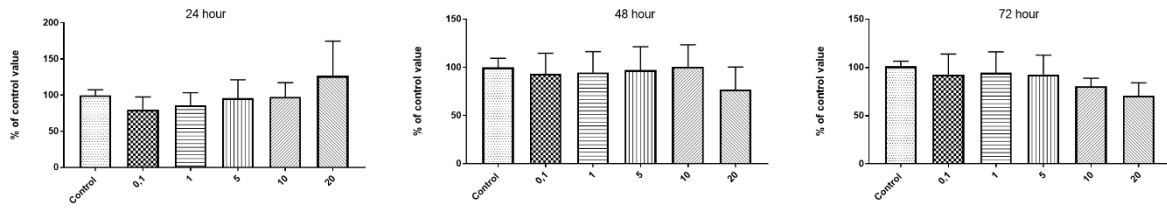

## NR

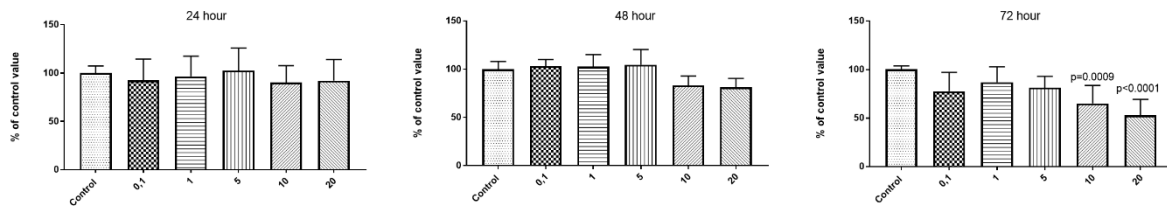

## Viability

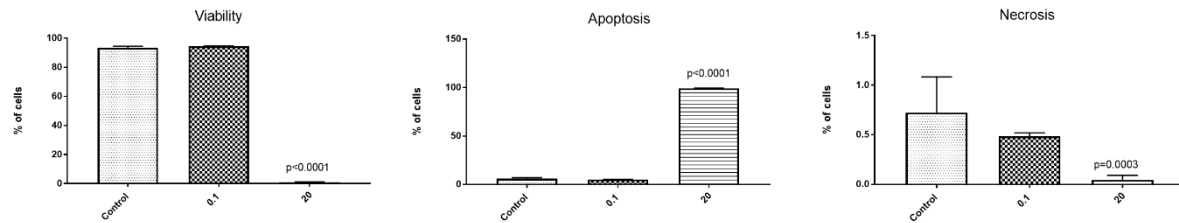

## Cell Cycle

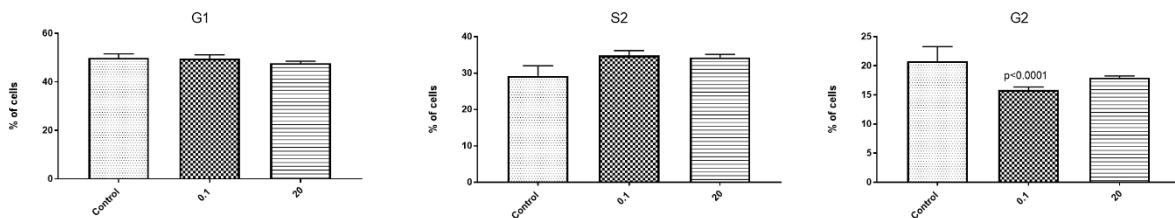

Figure S46. Impact of CT -GD extract (sample after the *in vitro* digestion of control traditionally-dried sample) on cytotoxicity (MTT and NR method), type of cell death (Annex V and PI test) and individual phases of the cancer gastric epithelial NCI-N87 (ATCC® CRL5822™) cell line.

## MTT

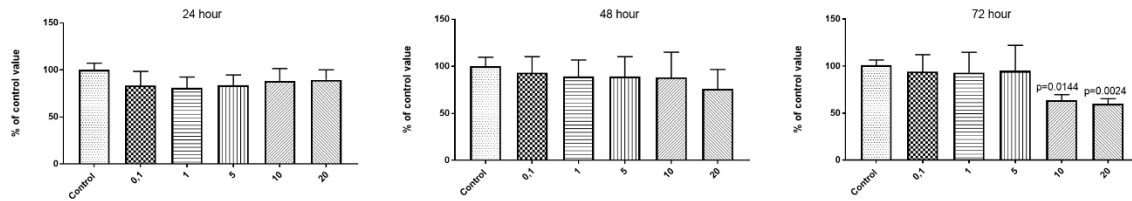

## NR

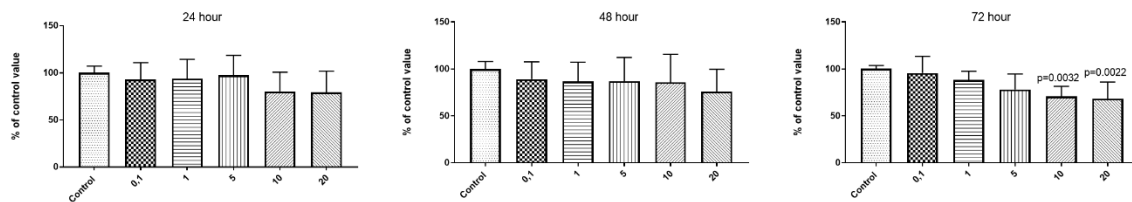

## Viability

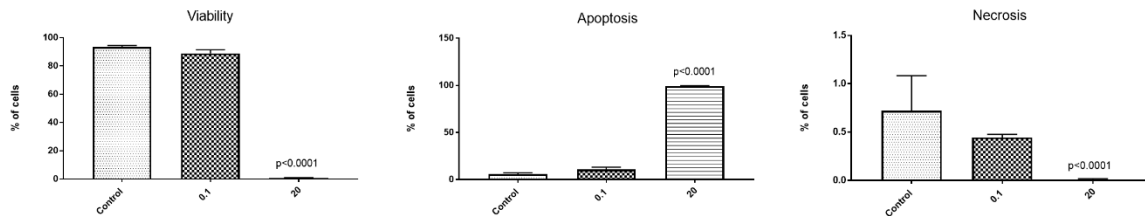

## Cell Cycle

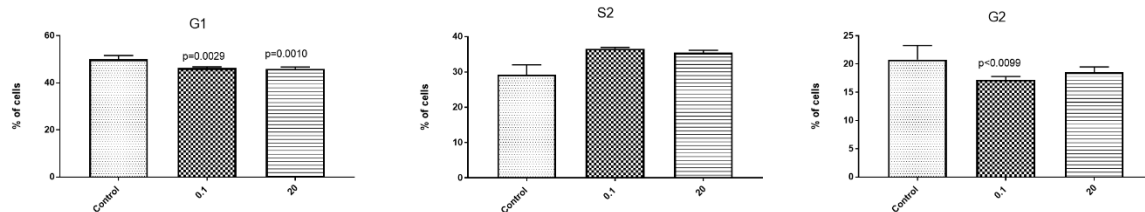

Figure S47. Impact of JAT -GD extract (sample after the *in vitro* digestion of traditionally-dried sample from plants elicited with 10  $\mu$ M of jasmonic acid) on cytotoxicity (MTT and NR method), type of cell death (Annex V and PI test) and individual phases of the cancer gastric epithelial NCI-N87 (ATCC® CRL5822™) cell line.

## MTT

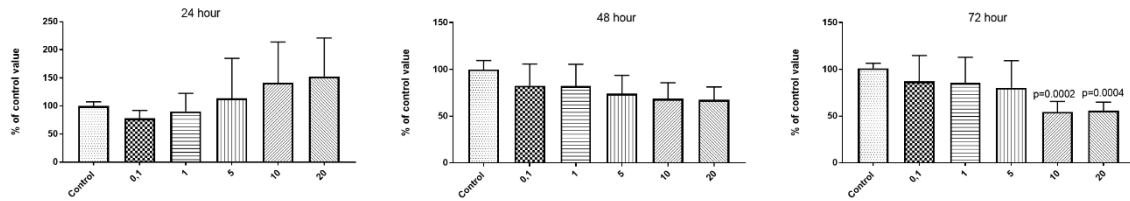

## NR

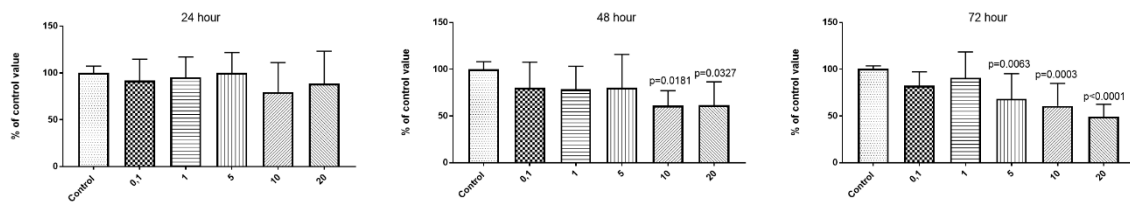

## Viability

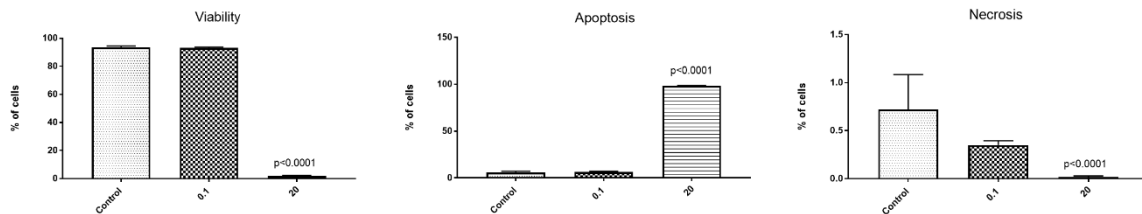

## Cell Cycle

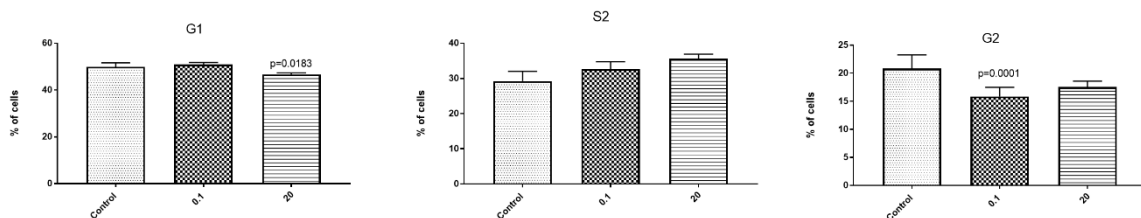

Figure S48. Impact of YET -GD extract (sample after the *in vitro* digestion of traditionally-dried sample from plants elicited with 0.1% yeast extract) on cytotoxicity (MTT and NR method), type of cell death (Annex V and PI test) and individual phases of the cancer gastric epithelial NCI-N87 (ATCC® CRL5822™) cell line.

## MTT

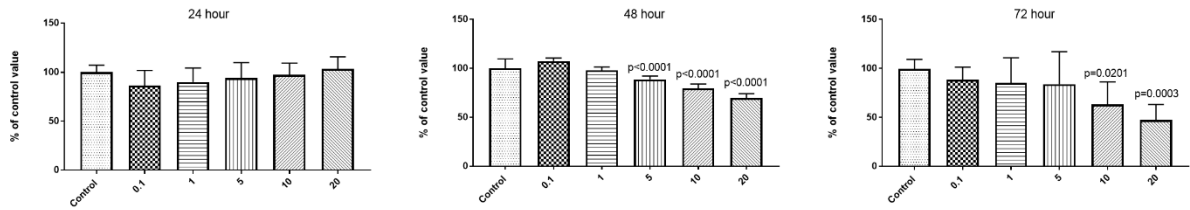

## NR

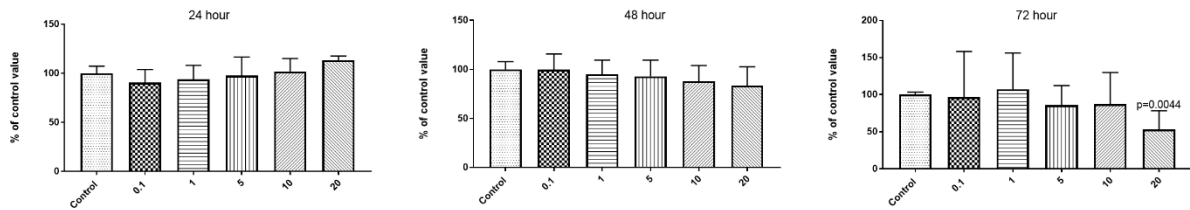

## Viability

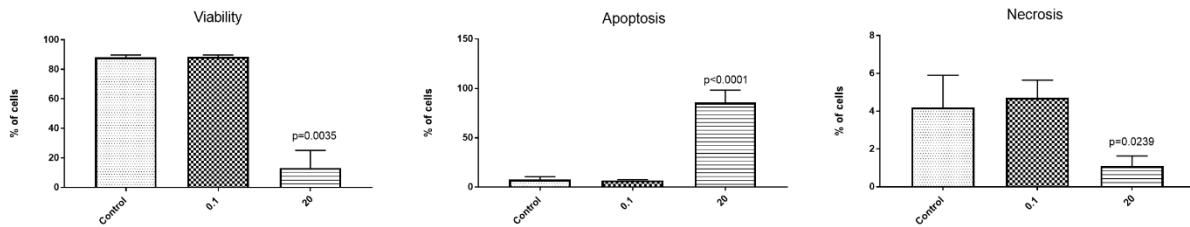

## Cell Cycle

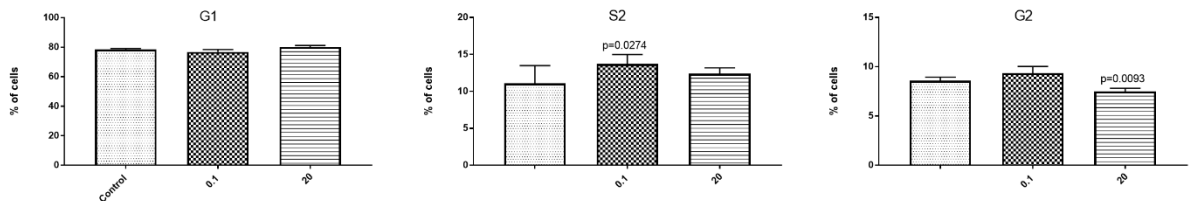

Figure S49. Impact of CT-E (ethanolic extract of control traditionally-dried sample) on cytotoxicity (MTT and NR method), type of cell death (Annex V and PI test) and individual phases of the prostate cancer line VCaP – (ATCC® CRL-2876™).

## MTT

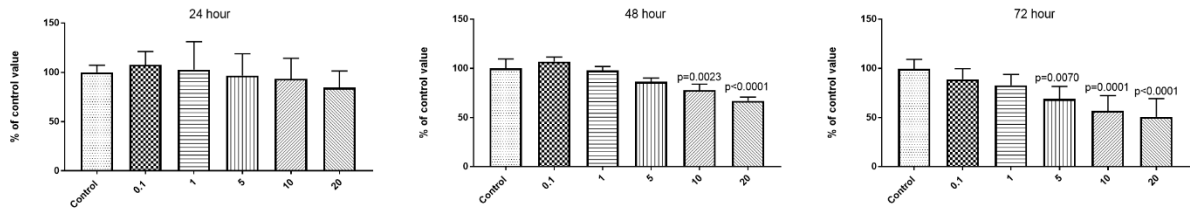

## NR

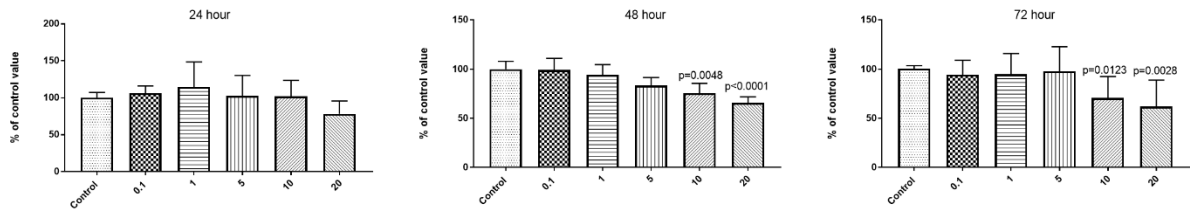

## Viability

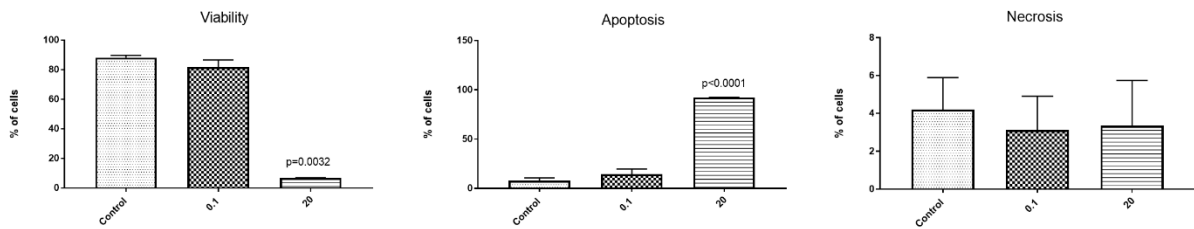

## Cell Cycle

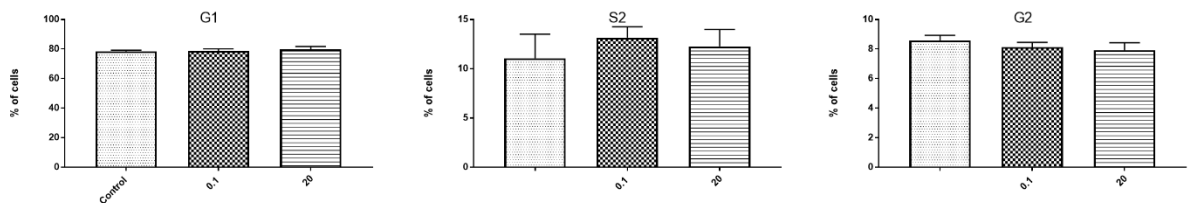

Figure S50. Impact of JAT-E (ethanolic extract of traditionally-dried sample from plants elicited with 10  $\mu$ M of jasmonic acid) on cytotoxicity (MTT and NR method), type of cell death (Annex V and PI test) and individual phases of the prostate cancer line VCaP – (ATCC® CRL-2876™).

## MTT

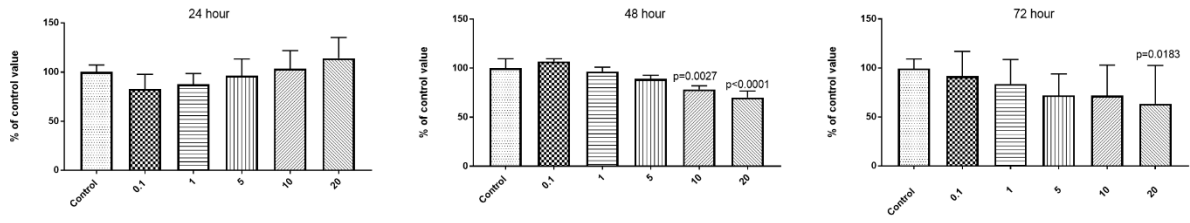

## NR

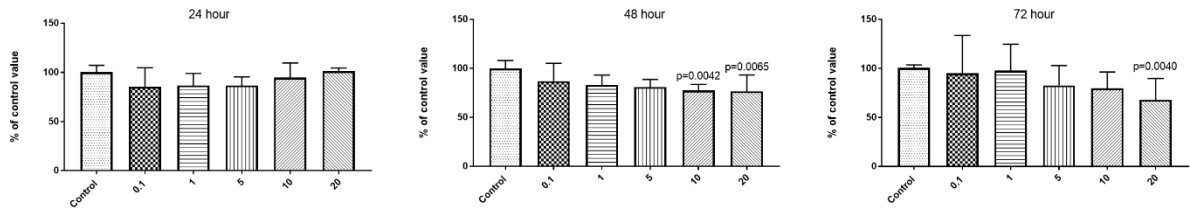

## Viability

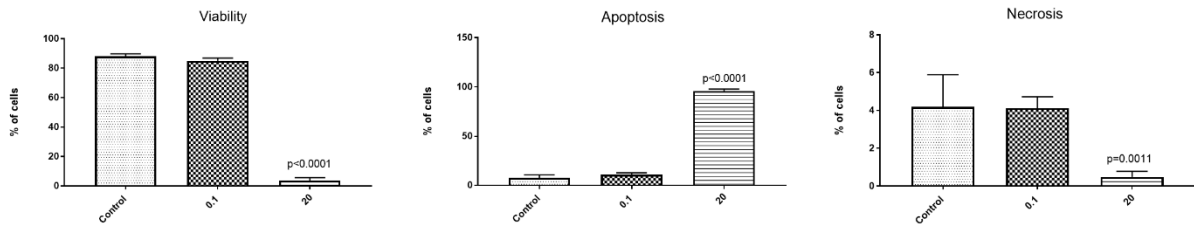

## Cell Cycle

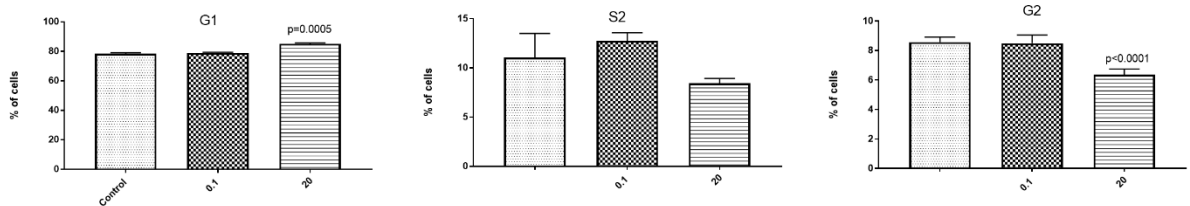

Figure S51. Impact of YET-E (ethanolic extract of traditionally-dried sample from plants elicited with 0.1% yeast extract) on cytotoxicity (MTT and NR method), type of cell death (Annex V and PI test) and individual phases of the prostate cancer line VCaP – (ATCC® CRL-2876™).

## MTT

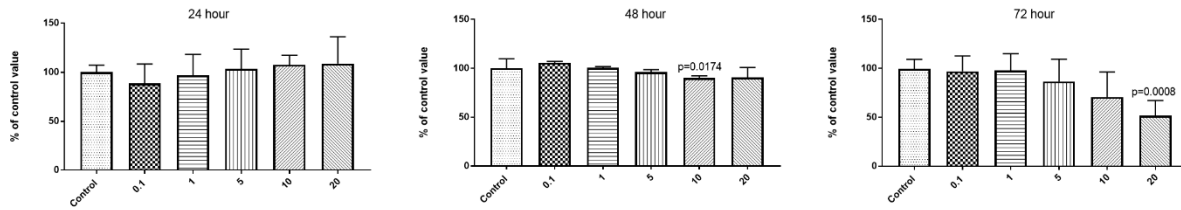

## NR

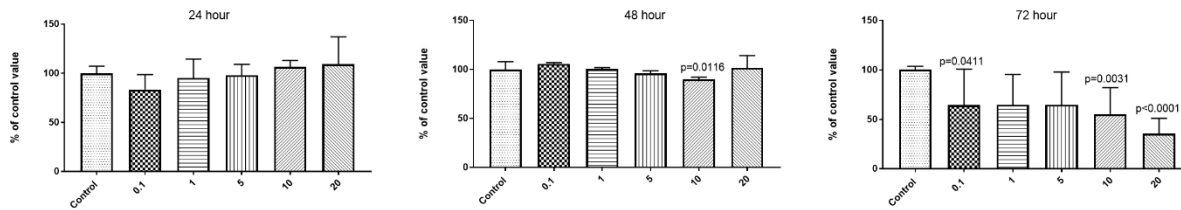

## Viability

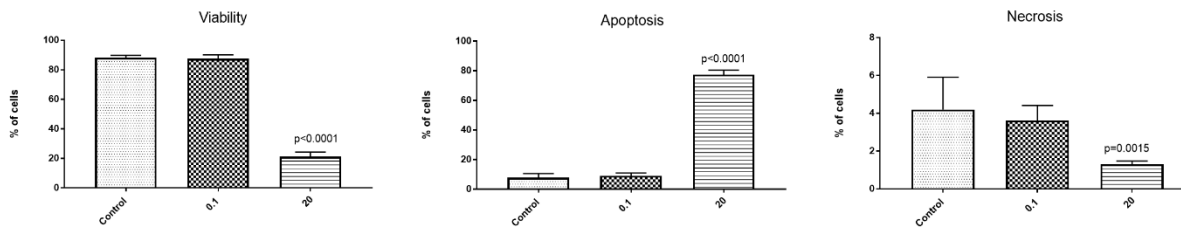

## Cell Cycle

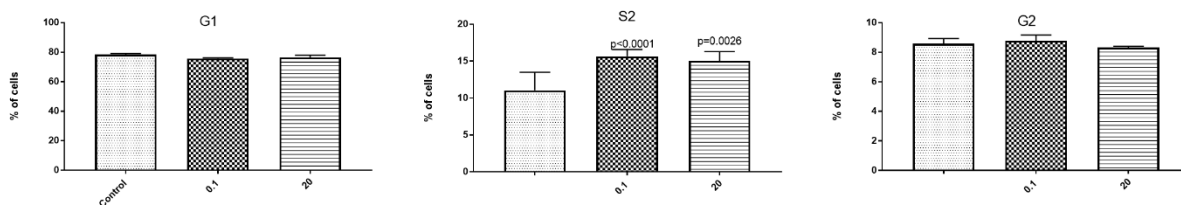

Figure S52. Impact of CT-GD extract (sample after the *in vitro* digestion of control traditionally-dried sample) on cytotoxicity (MTT and NR method), type of cell death (Annex V and PI test) and individual phases of the prostate cancer line VCaP – (ATCC® CRL-2876™).



## MTT

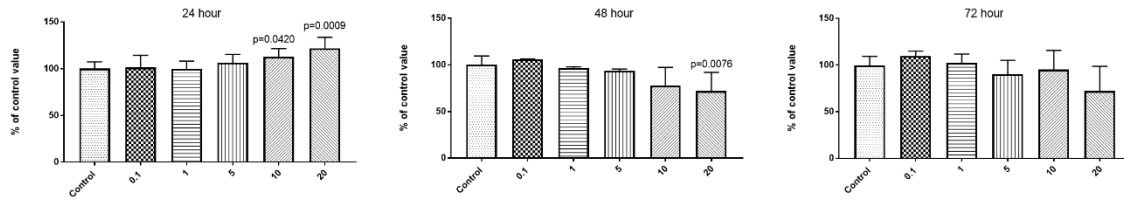

## NR

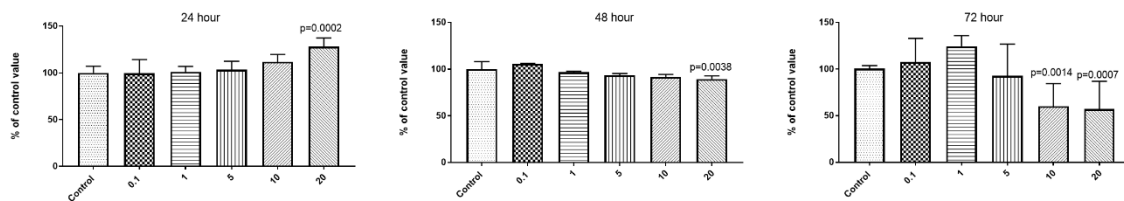

## Viability

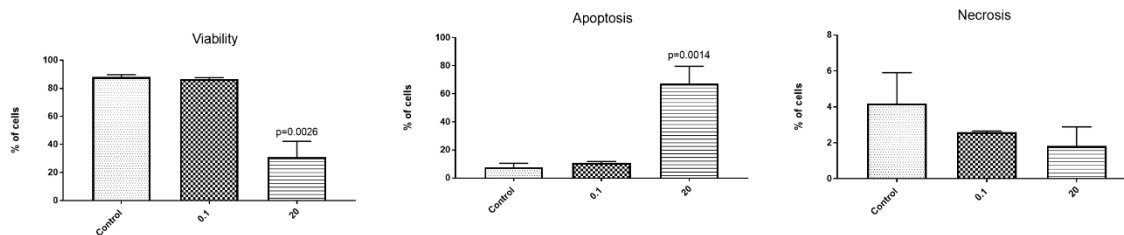

## Cell Cycle

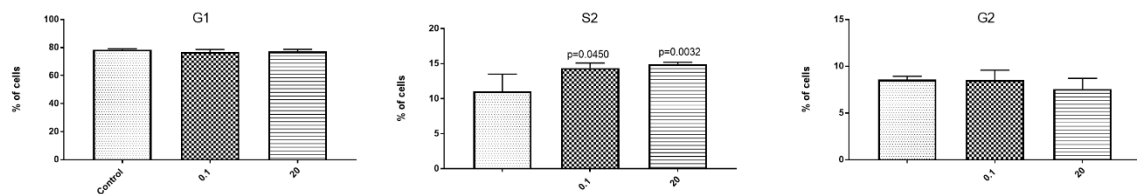

Figure S53. Impact of JAT -GD extract (sample after the *in vitro* digestion of traditionally-dried sample from plants elicited with 10  $\mu$ M of jasmonic acid) on cytotoxicity (MTT and NR method), type of cell death (Annex V and PI test) and individual phases of the prostate cancer line VCaP – (ATCC® CRL-2876™).

## MTT

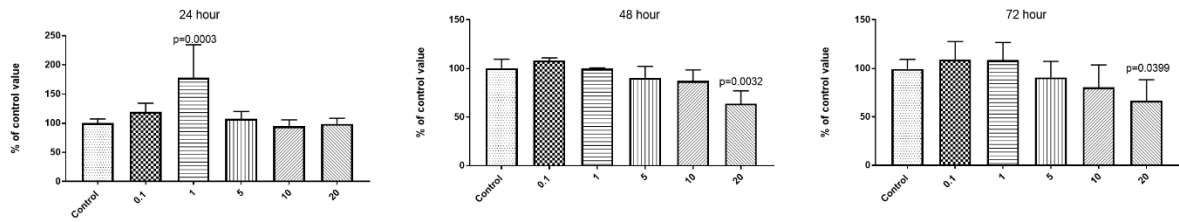

## NR

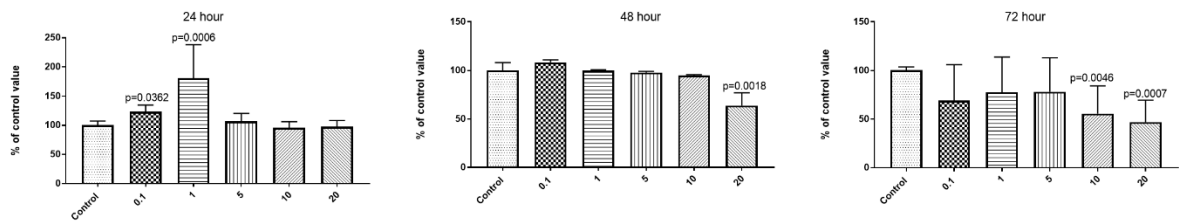

## Viability

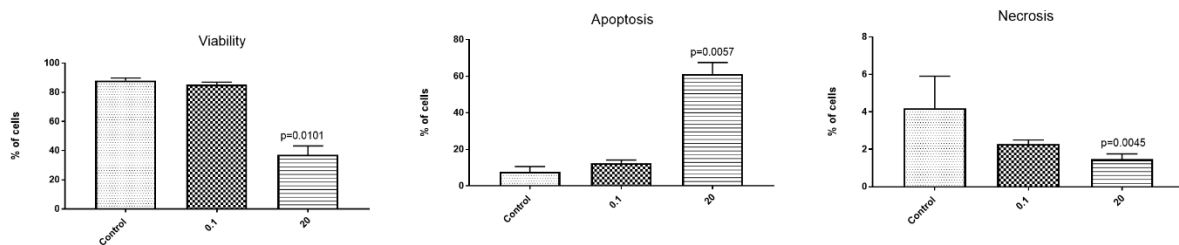

## Cell Cycle

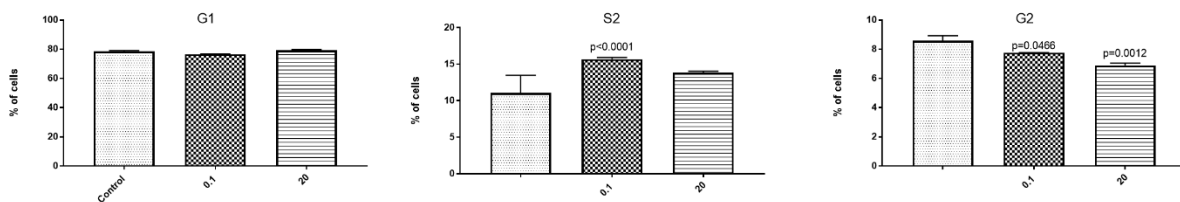

Figure S54. Impact of YET -GD extract (sample after the *in vitro* digestion of traditionally-dried sample from plants elicited with 0.1% yeast extract) on cytotoxicity (MTT and NR method), type of cell death (Annex V and PI test) and individual phases of the prostate cancer line VCaP – (ATCC® CRL-2876™).

## MTT

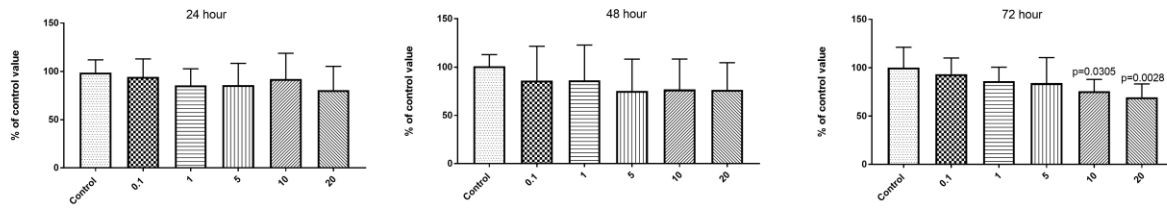

## NR

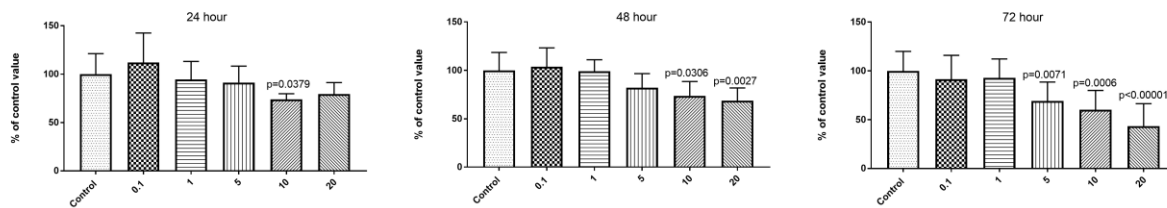

## Viability

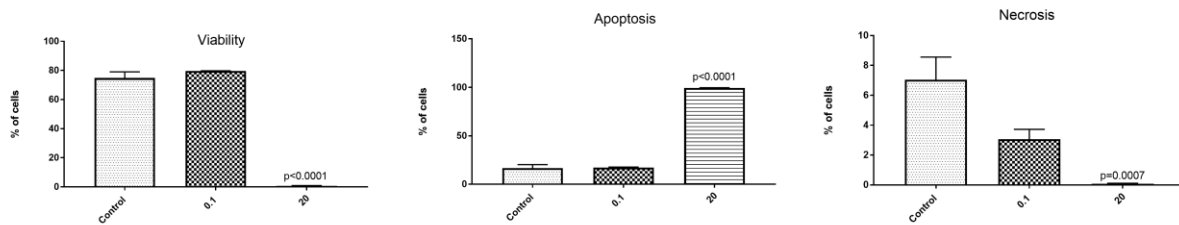

## Cell Cycle

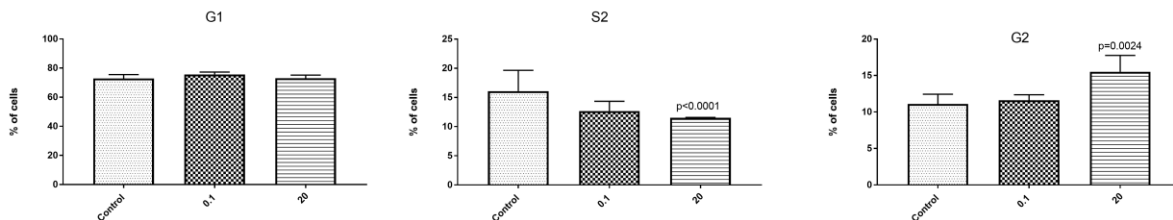

Figure S55. Impact of CC-E (ethanolic extract of control convectionally-dried sample) on cytotoxicity (MTT and NR method), type of cell death (Annex V and PI test) and individual phases of the cell cycle of the healthy prostate epithelial cells (HPrEC ATCC® PCS-440-010™ cell line).

## MTT

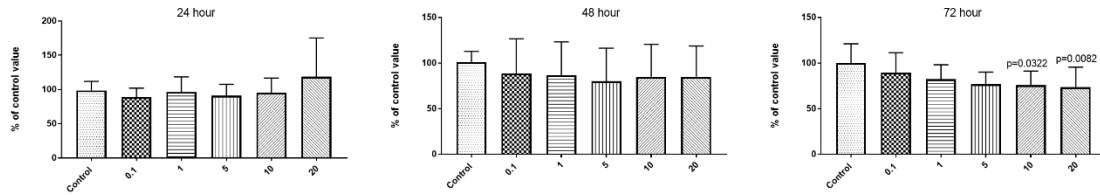

## NR

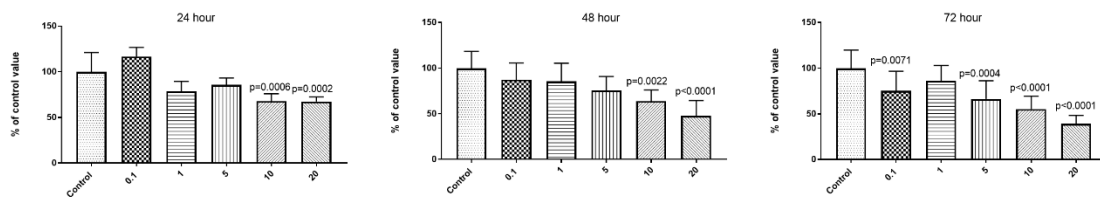

## Viability

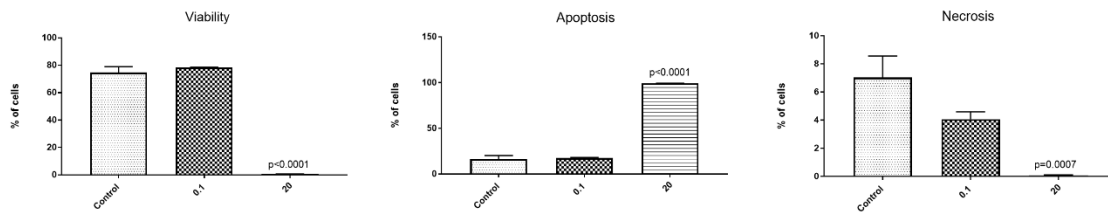

## Cell Cycle

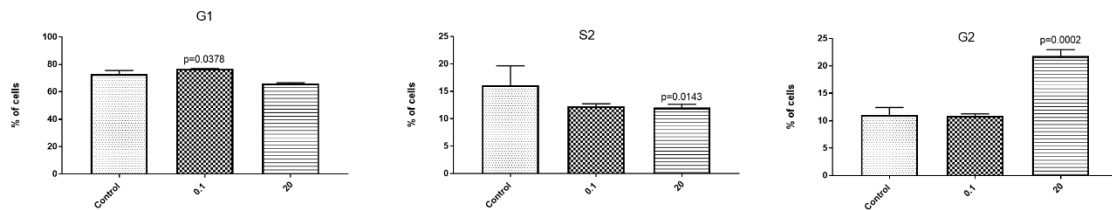

Figure S56. Impact of JAC-E (ethanolic extract of convectionally-dried sample from plants elicited with 10  $\mu$ M of jasmonic acid) on cytotoxicity (MTT and NR method), type of cell death (Annex V and PI test) and individual phases of the cell cycle of the healthy prostate epithelial cells (HPrEC ATCC® PCS-440-010™ cell line).

## MTT

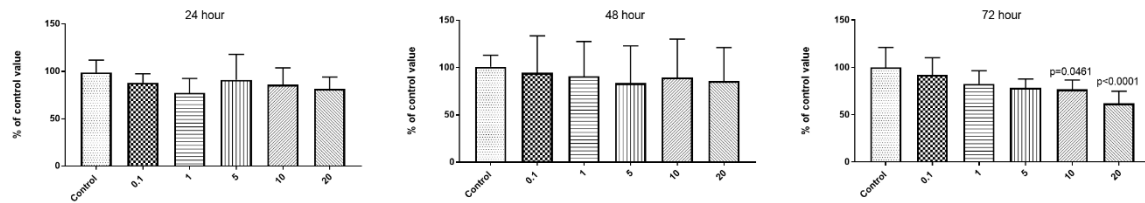

## NR

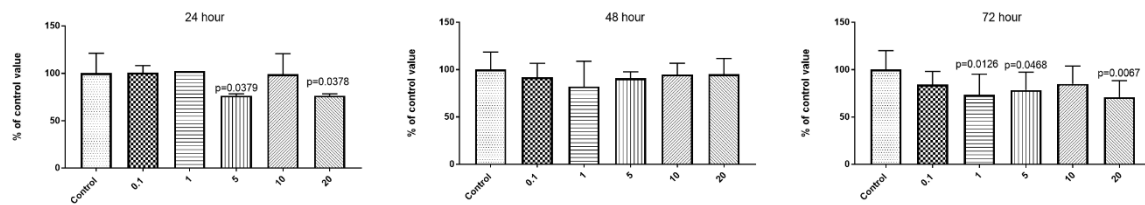

## Viability

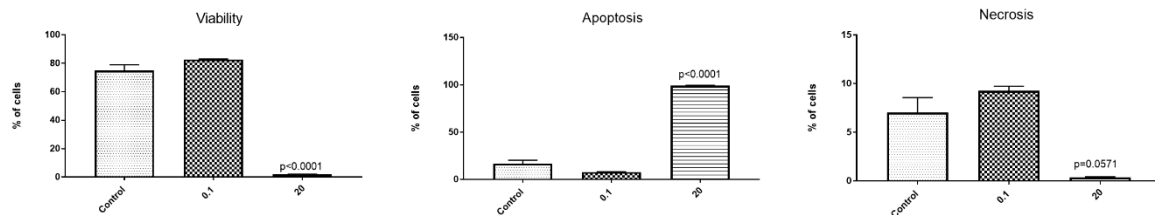

## Cell Cycle

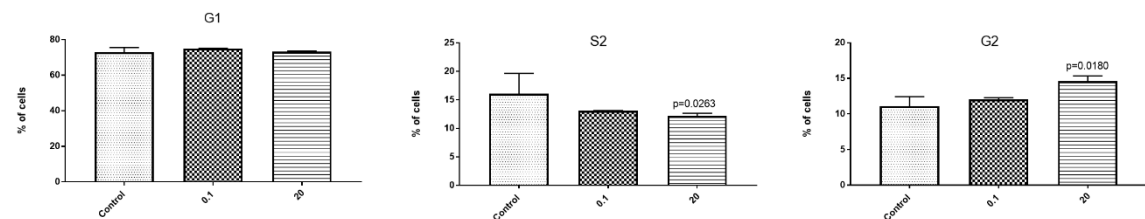

Figure S57. Impact of YEC-E (ethanolic extract of convectionally-dried sample from plants elicited with 0.1% yeast extract) on cytotoxicity (MTT and NR method), type of cell death (Annex V and PI test) and individual phases of the cell cycle of the healthy prostate epithelial cells (HPrEC ATCC® PCS-440-010™ cell line).

## MTT

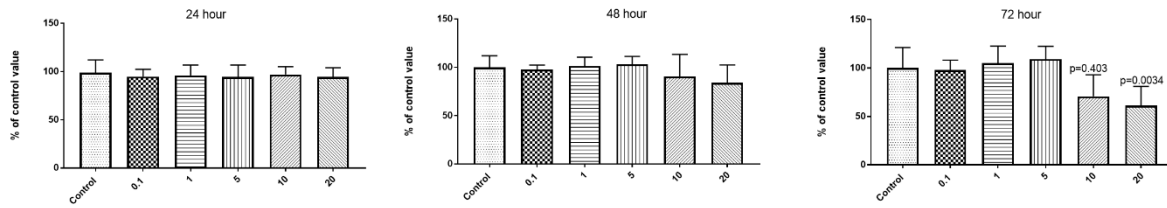

## NR

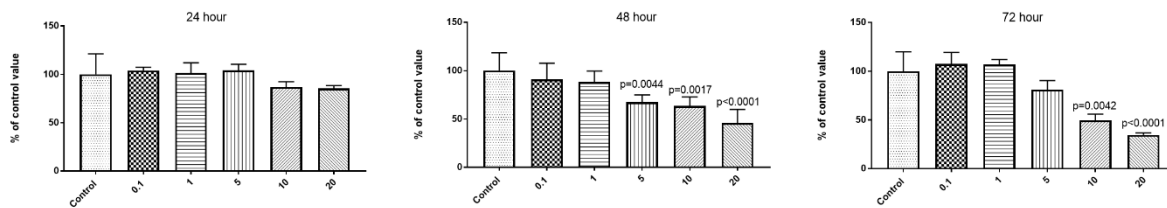

## Viability

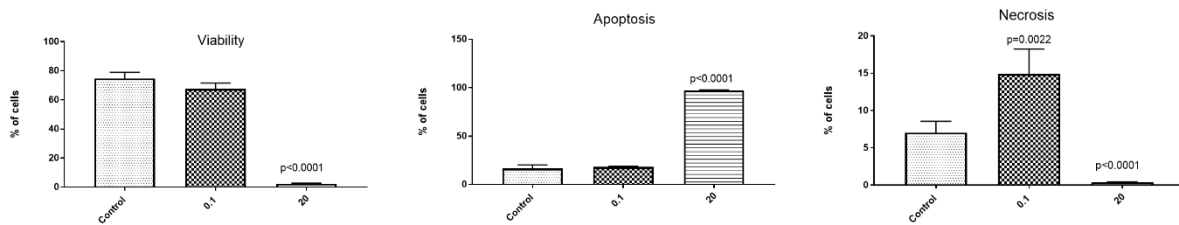

## Cell Cycle

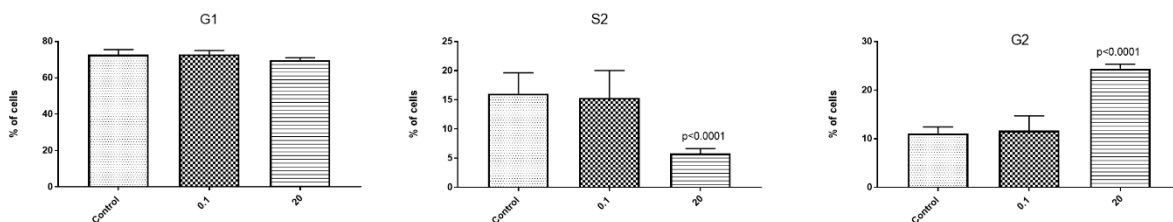

Figure S58. Impact of CC-GD extract (sample after the *in vitro* digestion of control convectionally-dried sample) on cytotoxicity (MTT and NR method), type of cell death (Annex V and PI test) and individual phases of the cell cycle of the healthy prostate epithelial cells (HPrEC ATCC® PCS-440-010™ cell line).

## MTT

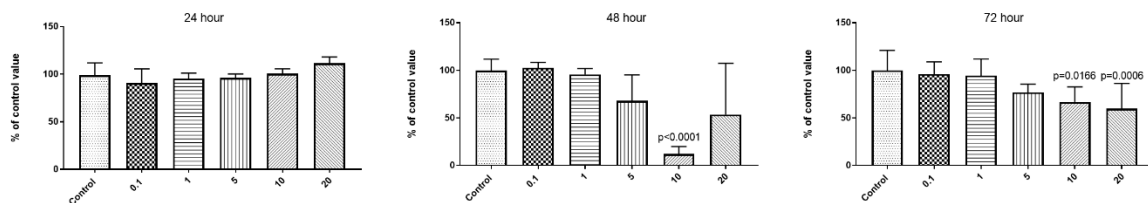

## NR

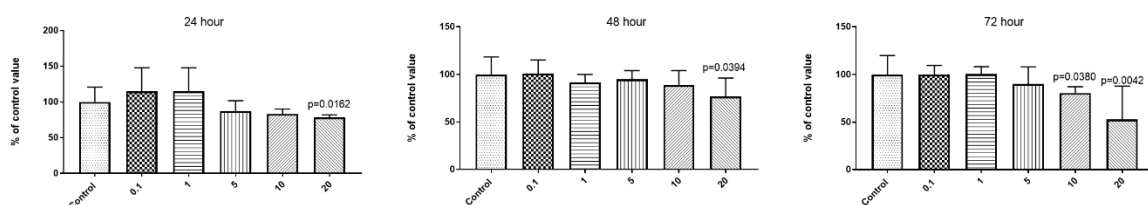

## Viability

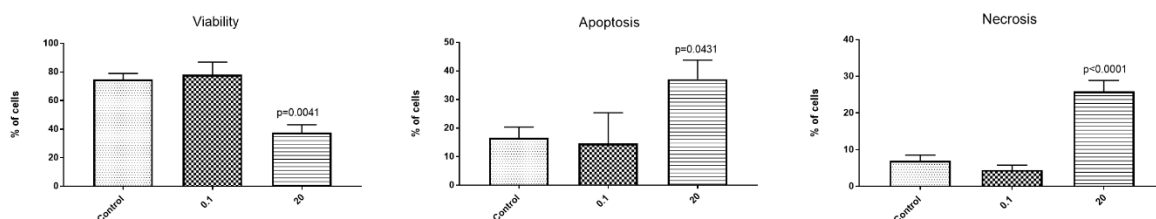

## Cell Cycle

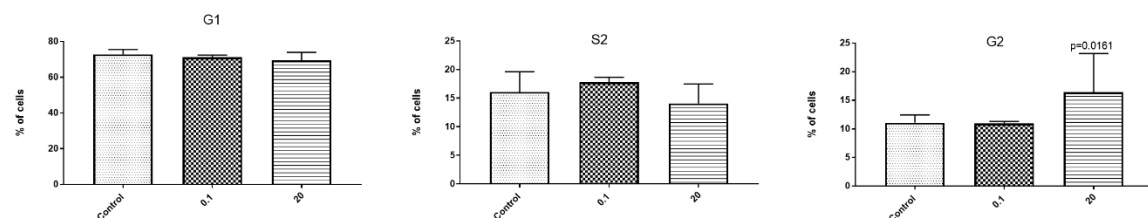

Figure S59. Impact of JAC-GD (sample after the *in vitro* digestion of convectionally-dried sample from plants elicited with 10  $\mu$ M of jasmonic acid) on cytotoxicity (MTT and NR method), type of cell death (Annex V and PI test) and individual phases of the cell cycle of the healthy prostate epithelial cells (HPrEC ATCC® PCS-440-010™ cell line).

## MTT

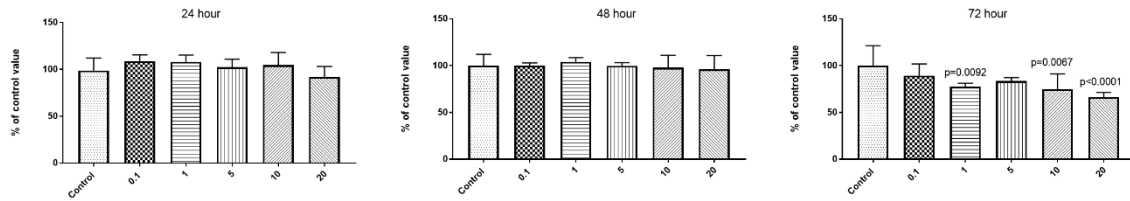

## NR

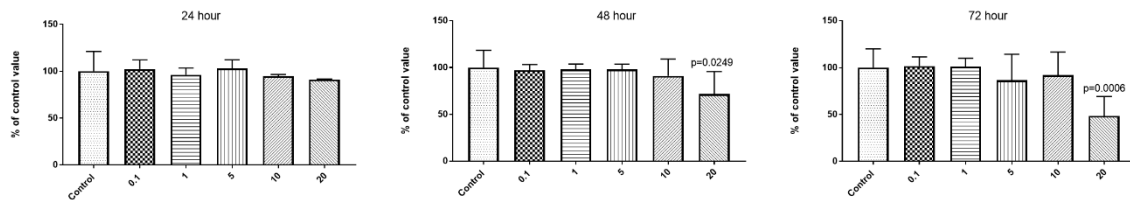

## Viability

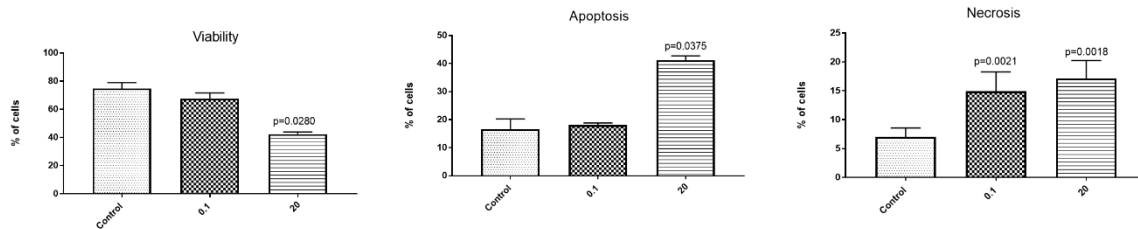

## Cell Cycle

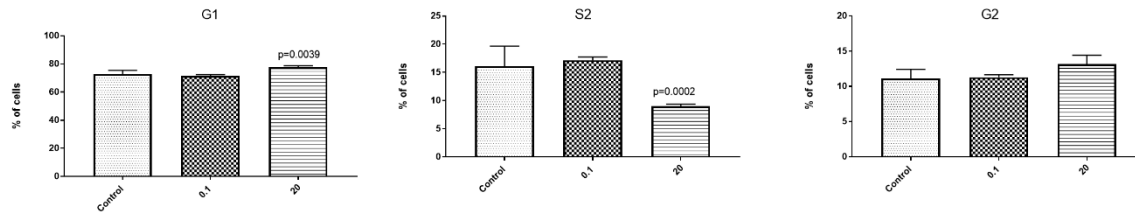

Figure S60. Impact of YEC -GD extract (sample after the *in vitro* digestion of convectionally-dried sample from plants elicited with 0.1% yeast extract) on cytotoxicity (MTT and NR method), type of cell death (Annex V and PI test) and individual phases of the cell cycle of the healthy prostate epithelial cells (HPrEC ATCC® PCS-440-010™ cell line).



## MTT

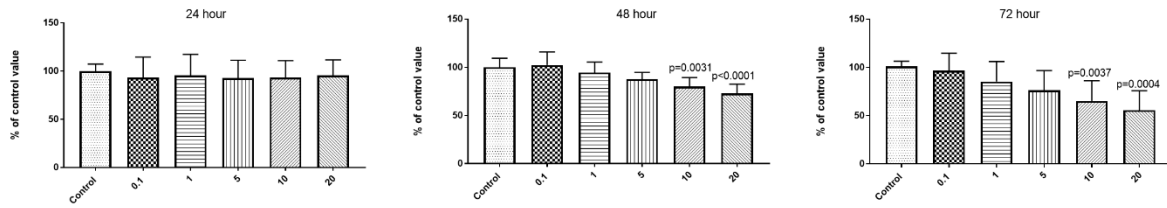

## NR

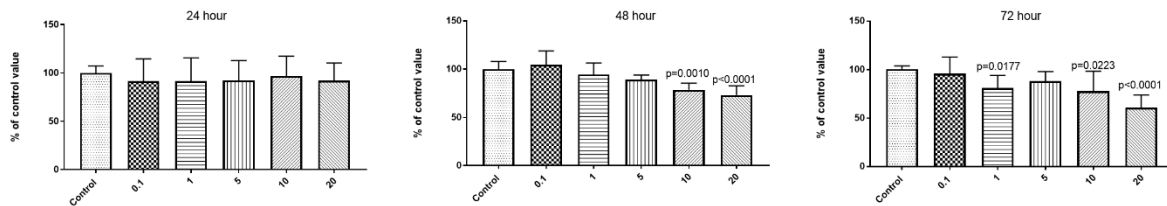

## Viability

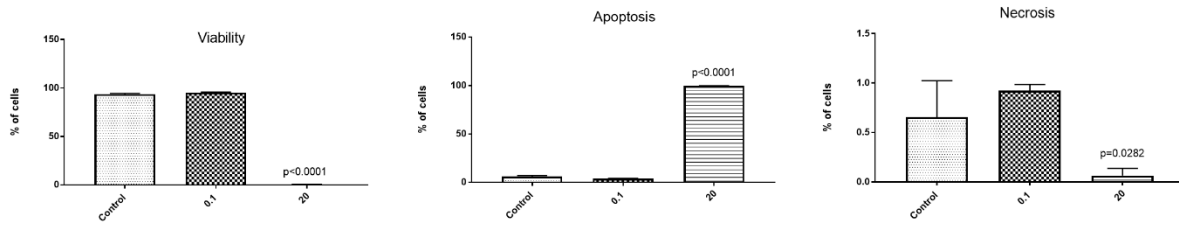

## Cell Cycle

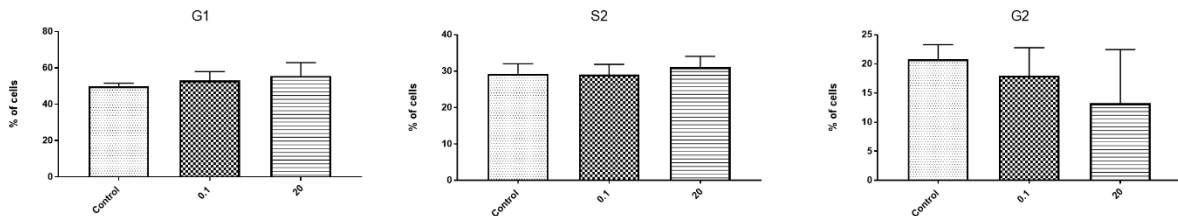

Figure S61. Impact of CC-E (ethanolic extract of control convectionally-dried sample) on cytotoxicity (MTT and NR method), type of cell death (Annex V and PI test) and individual phases of the cancer gastric epithelial NCI-N87 (ATCC® CRL5822™) cell line.

## MTT

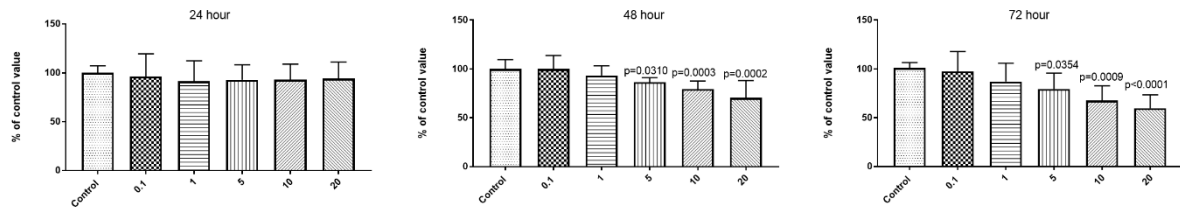

## NR

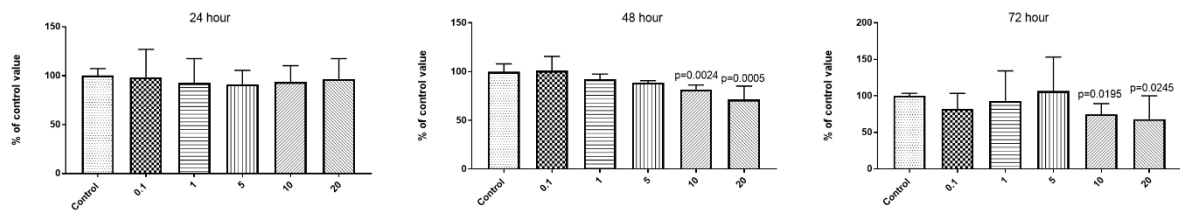

## Viability

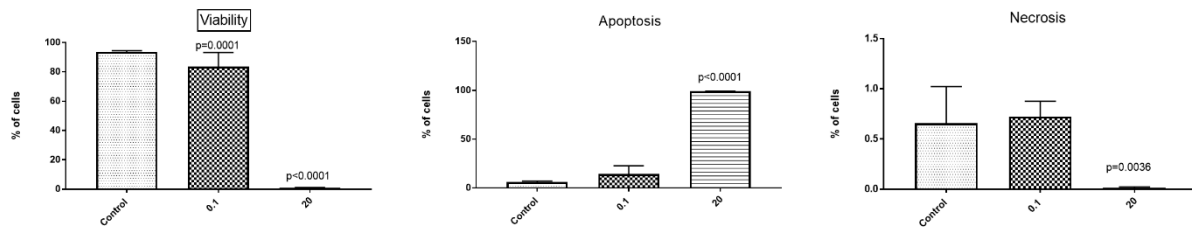

## Cell Cycle

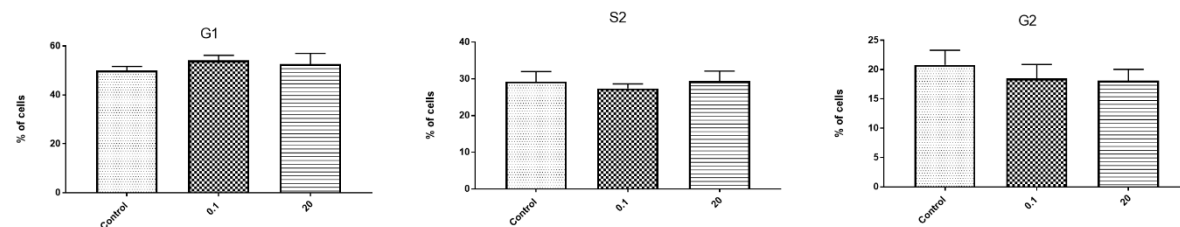

Figure S62. Impact of JAC-E (ethanolic extract of convectionally-dried sample from plants elicited with 10  $\mu$ M of jasmonic acid) on cytotoxicity (MTT and NR method), type of cell death (Annex V and PI test) and individual phases of the cancer gastric epithelial NCI-N87 (ATCC® CRL5822™) cell line.

## MTT

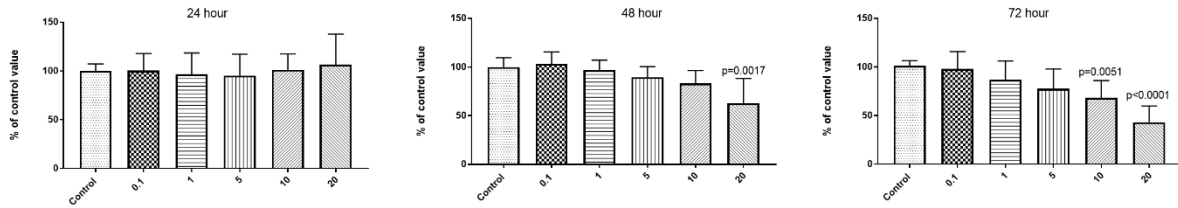

## NR

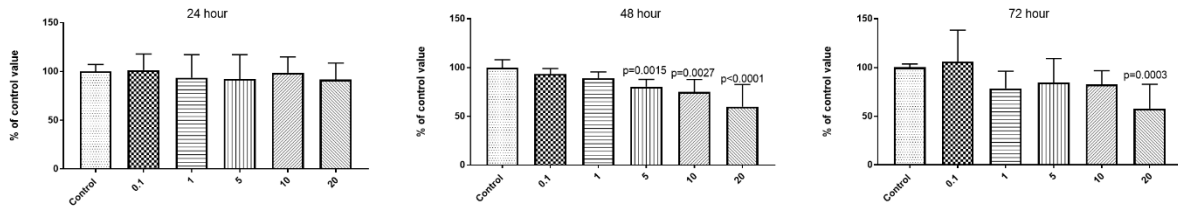

## Viability

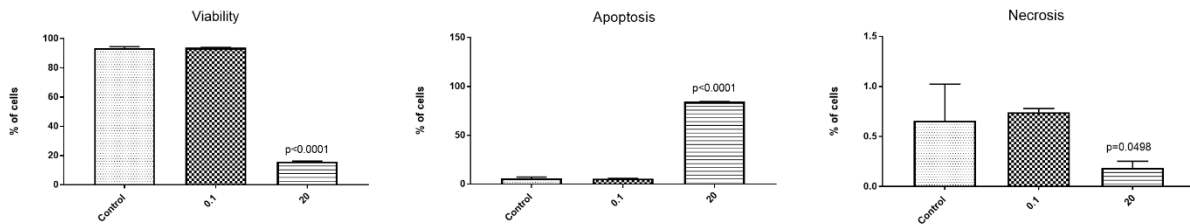

## Cell Cycle

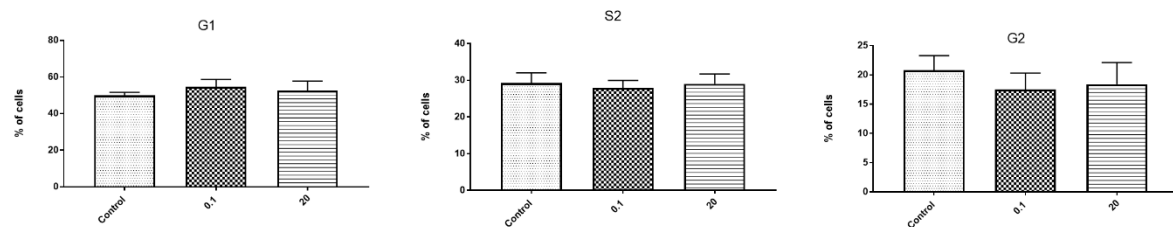

Figure S63. Impact of YEC-E (ethanolic extract of convectionally-dried sample from plants elicited with 0.1% yeast extract) on cytotoxicity (MTT and NR method), type of cell death (Annex V and PI test) and individual phases of the cancer gastric epithelial NCI-N87 (ATCC® CRL5822™) cell line.

## MTT

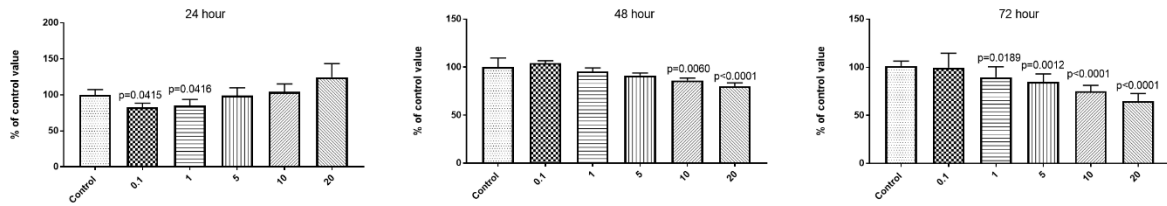

## NR

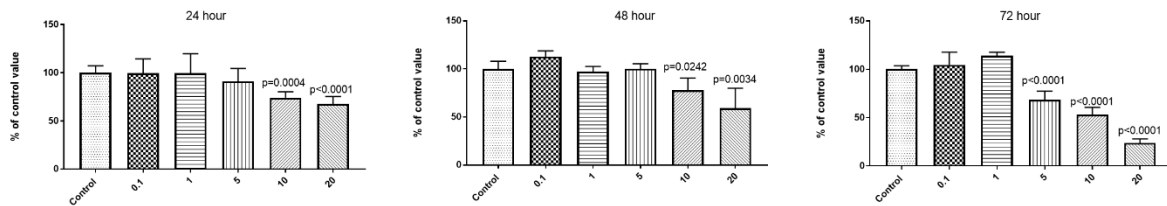

## Viability

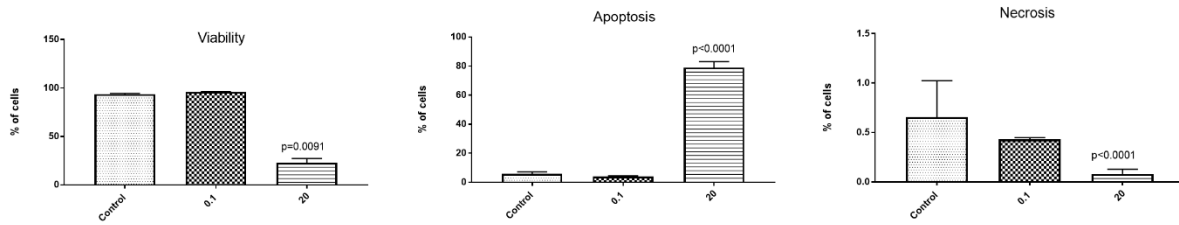

## Cell Cycle

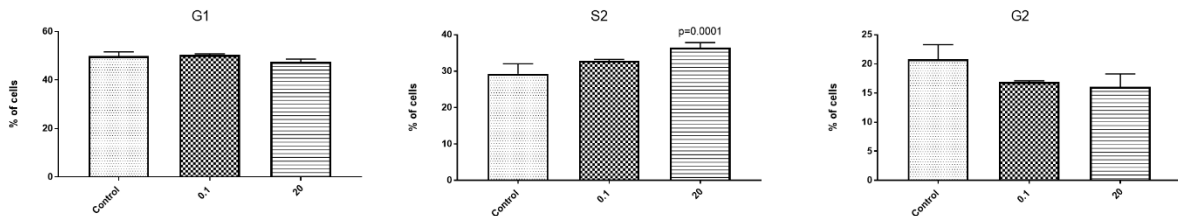

Figure S64. Impact of CC -GD extract (sample after the *in vitro* digestion of control convectionally-dried sample) on cytotoxicity (MTT and NR method), type of cell death (Annex V and PI test) and individual phases of the cancer gastric epithelial NCI-N87 (ATCC® CRL5822™) cell line.

## MTT

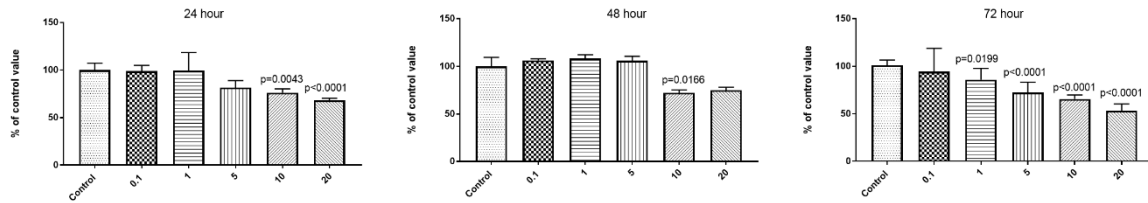

## NR

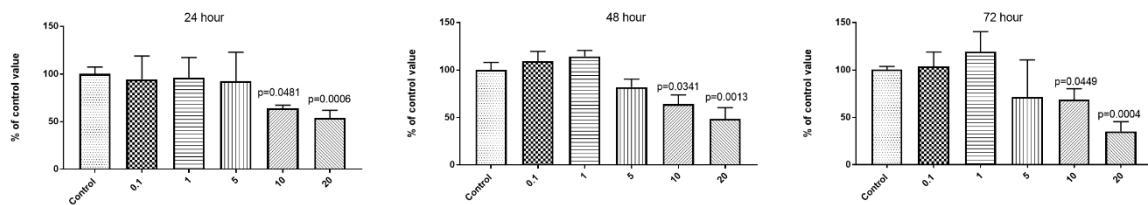

## Viability

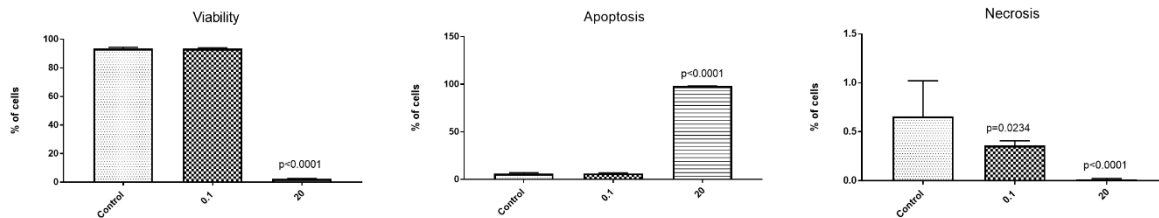

## Cell Cycle

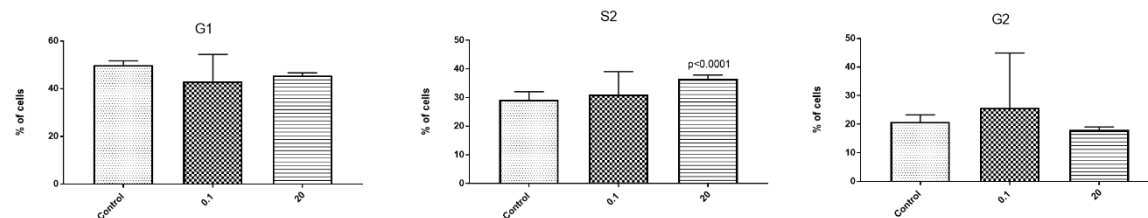

Figure S65. Impact of JAC -GD extract (sample after the *in vitro* digestion of convectionally-dried sample from plants elicited with 10  $\mu$ M of jasmonic acid) on cytotoxicity (MTT and NR method), type of cell death (Annex V and PI test) and individual phases of the cancer gastric epithelial NCI-N87 (ATCC® CRL5822™) cell line.

## MTT

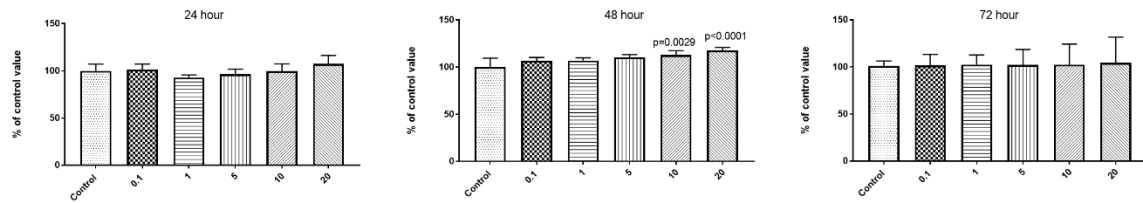

## NR

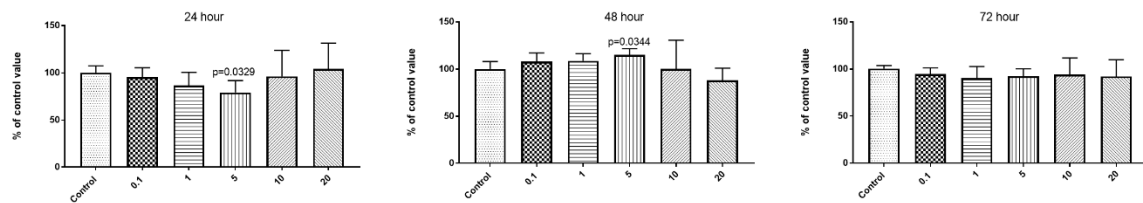

## Viability

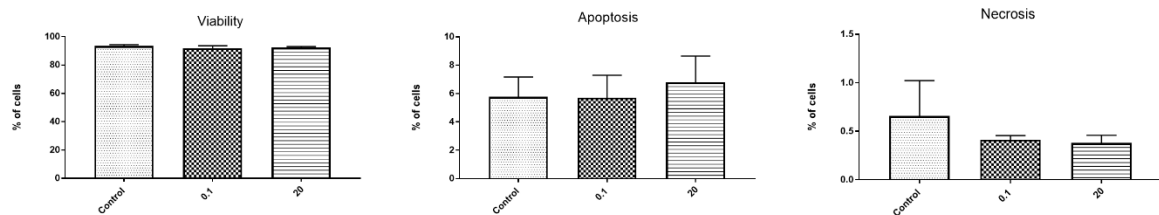

## Cell Cycle

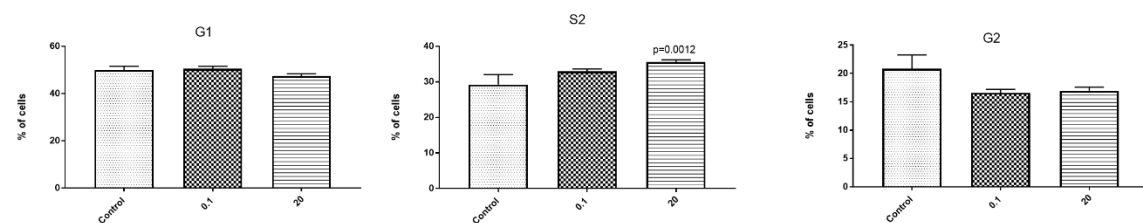

Figure S66. Impact of YEC -GD extract (sample after the *in vitro* digestion of convectionally-dried sample from plants elicited with 0.1% yeast extract) on cytotoxicity (MTT and NR method), type of cell death (Annex V and PI test) and individual phases of the cancer gastric epithelial NCI-N87 (ATCC® CRL5822™) cell line.

## MTT

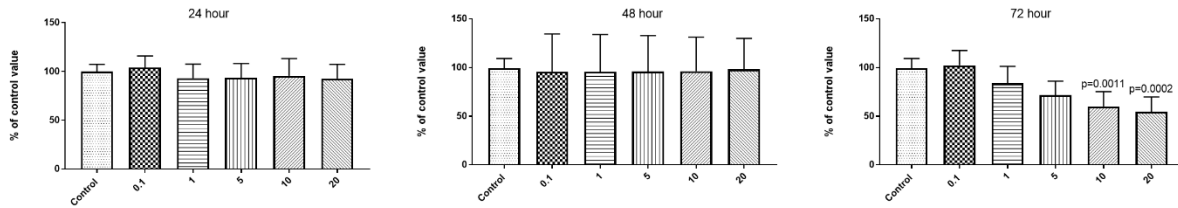

## NR

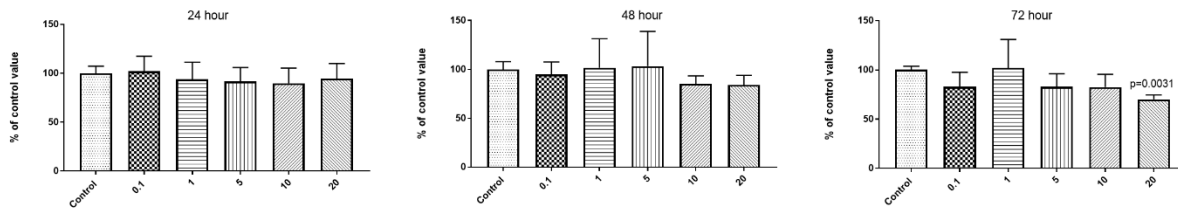

## Viability

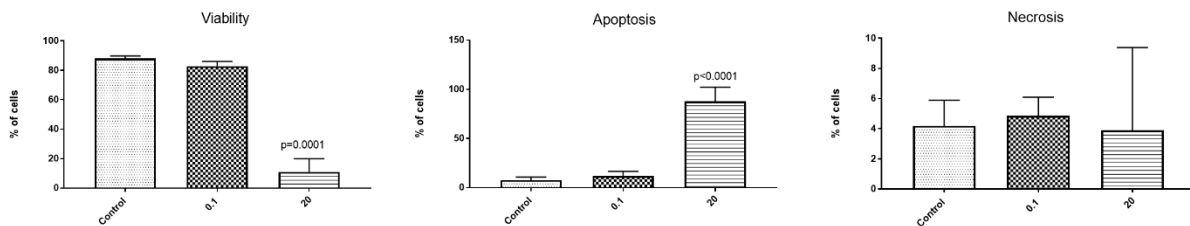

## Cell Cycle

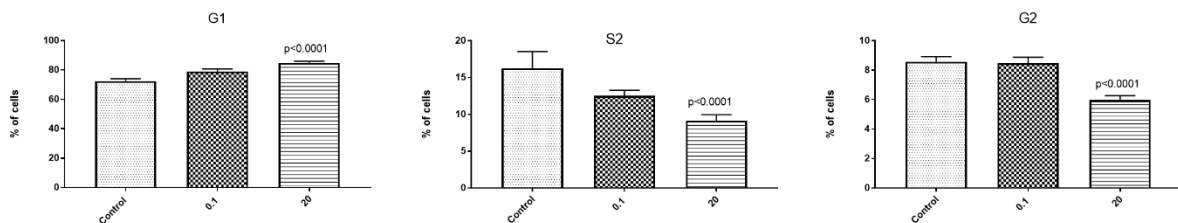

Figure S67. Impact of CC-E (ethanolic extract of control convectionally-dried sample) on cytotoxicity (MTT and NR method), type of cell death (Annex V and PI test) and individual phases of the prostate cancer line VCaP – (ATCC® CRL-2876™).

## MTT

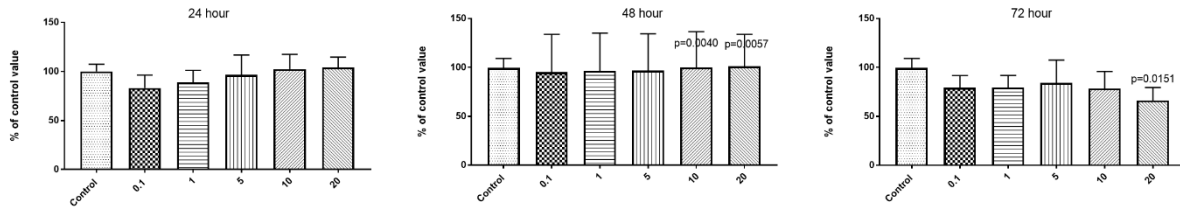

## NR

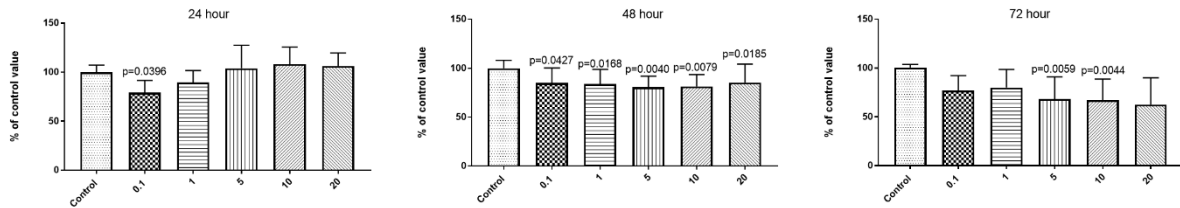

## Viability

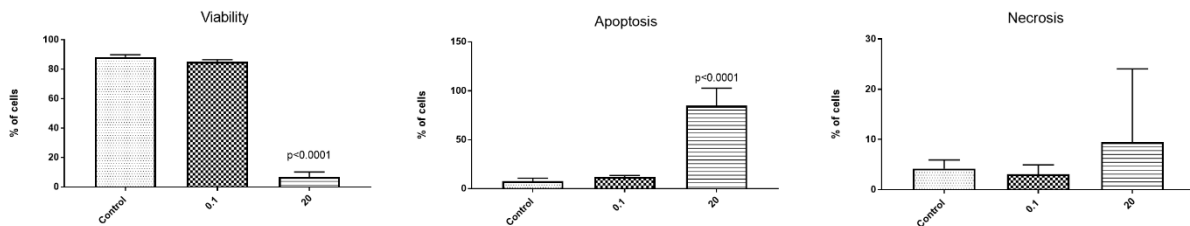

## Cell Cycle

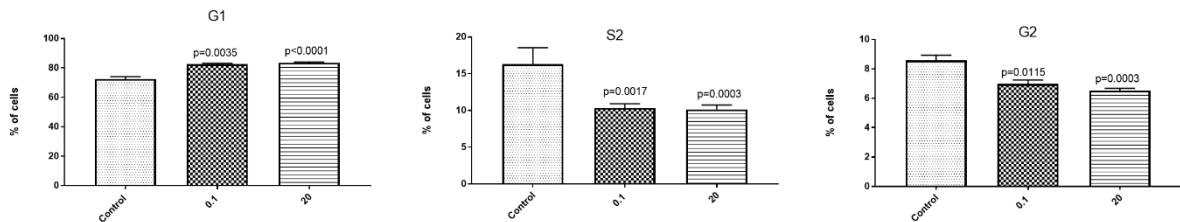

Figure S68. Impact of JAC-E (ethanolic extract of convectionally-dried sample from plants elicited with 10  $\mu$ M of jasmonic acid) on cytotoxicity (MTT and NR method), type of cell death (Annex V and PI test) and individual phases of the prostate cancer line VCaP – (ATCC® CRL-2876™).



## MTT

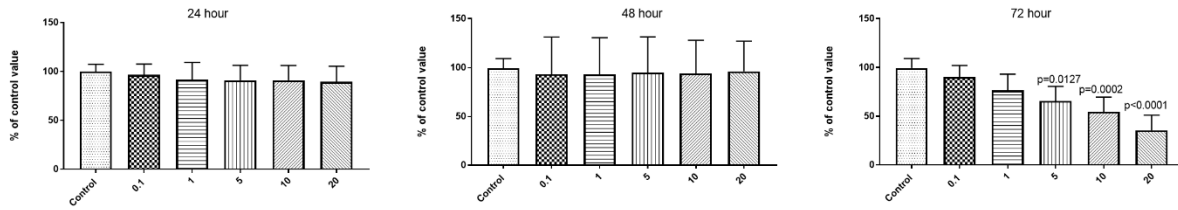

## NR

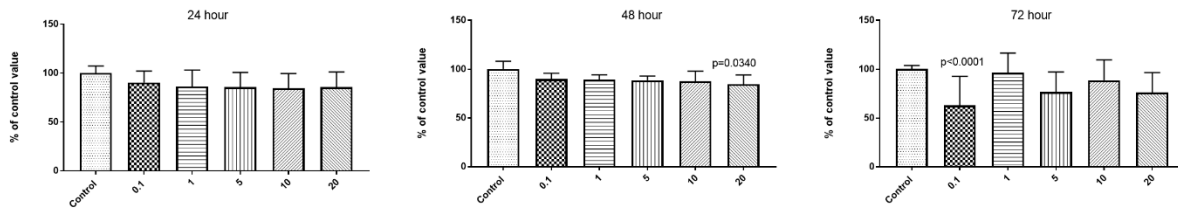

## Viability

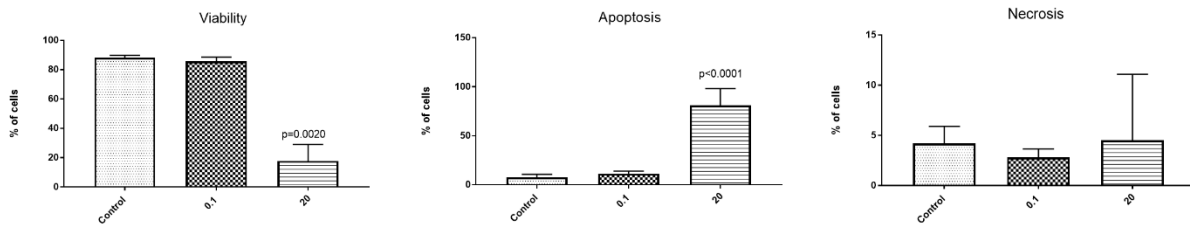

## Cell Cycle

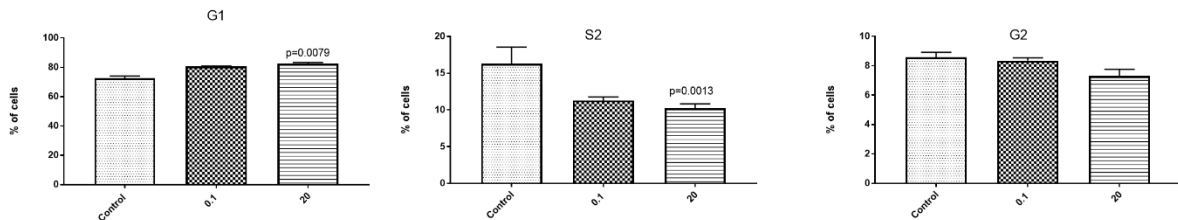

Figure S69. Impact of YEC-E (ethanolic extract of convectionally-dried sample from plants elicited with 0.1% yeast extract) on cytotoxicity (MTT and NR method), type of cell death (Annex V and PI test) and individual phases of the prostate cancer line VCaP – (ATCC® CRL-2876™).

## MTT

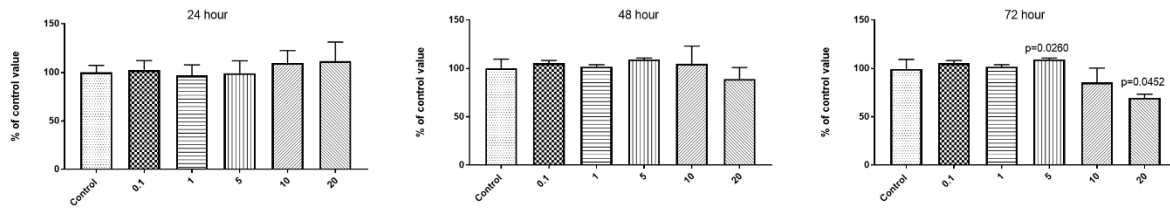

## NR

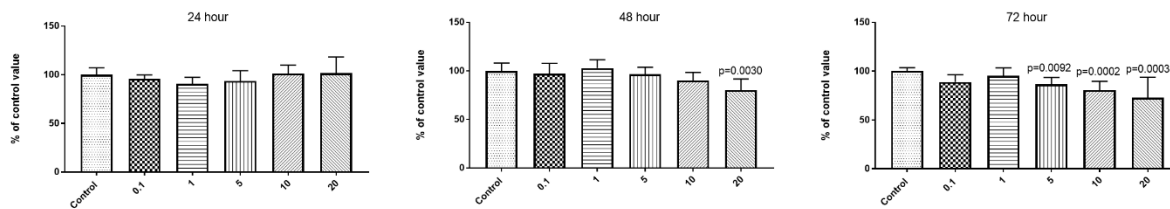

## Viability

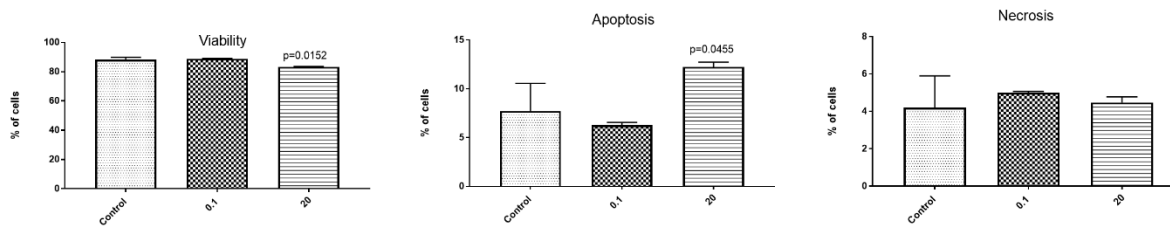

## Cell Cycle

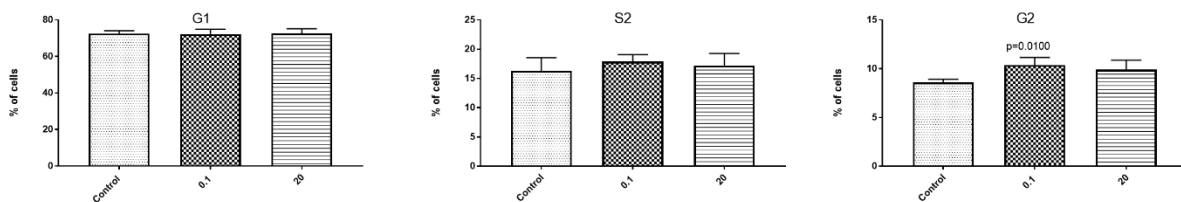

Figure S70. Impact of CC-GD extract (sample after the *in vitro* digestion of control convectionally-dried sample) on cytotoxicity (MTT and NR method), type of cell death (Annex V and PI test) and individual phases of the prostate cancer line VCaP – (ATCC® CRL-2876™).

## MTT

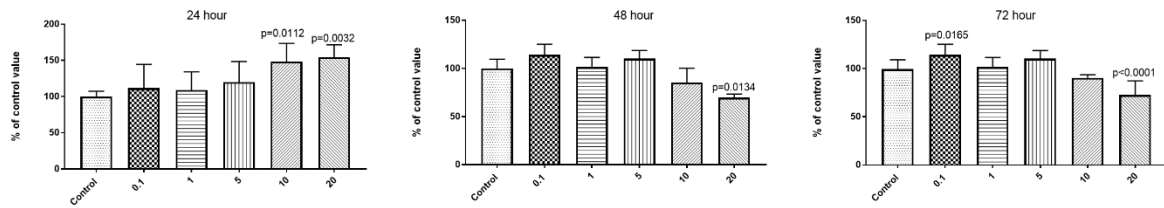

## NR

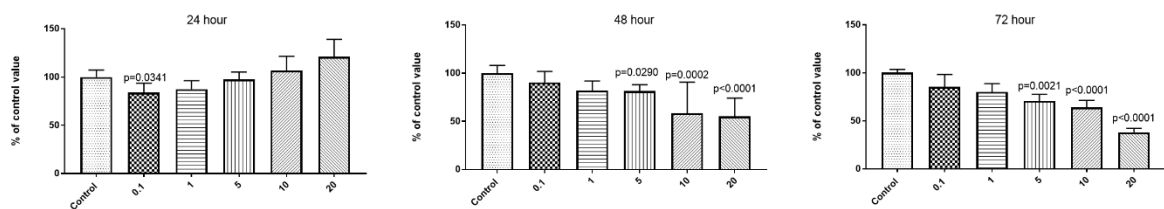

## Viability

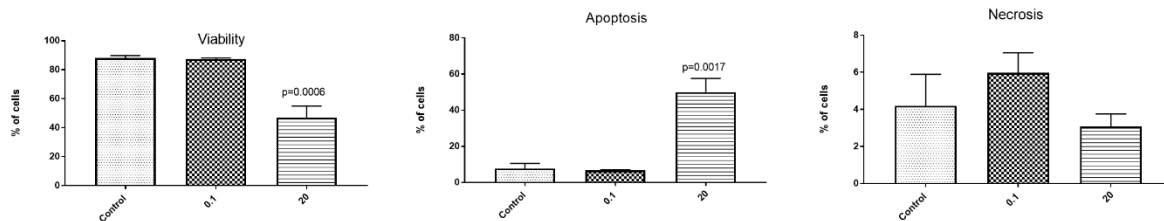

## Cell Cycle

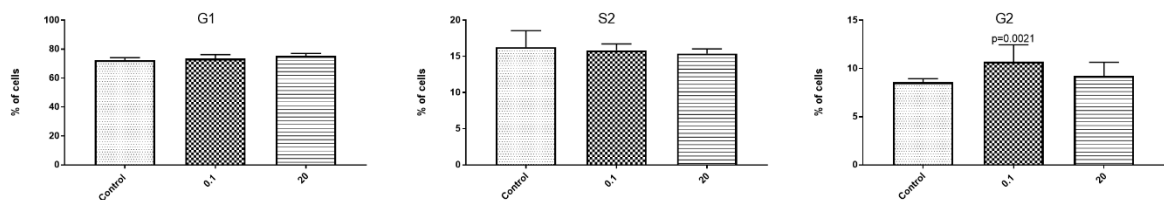

Figure S71. Impact of JAC -GD extract (sample after the *in vitro* digestion of convectionally-dried sample from plants elicited with 10  $\mu$ M of jasmonic acid) on cytotoxicity (MTT and NR method), type of cell death (Annex V and PI test) and individual phases of the prostate cancer line VCaP – (ATCC® CRL-2876™).

## MTT

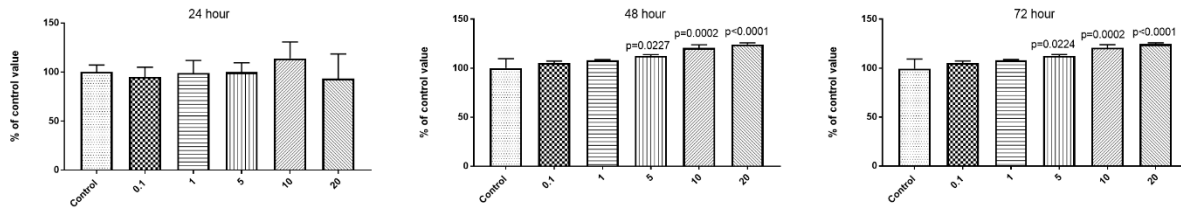

## NR

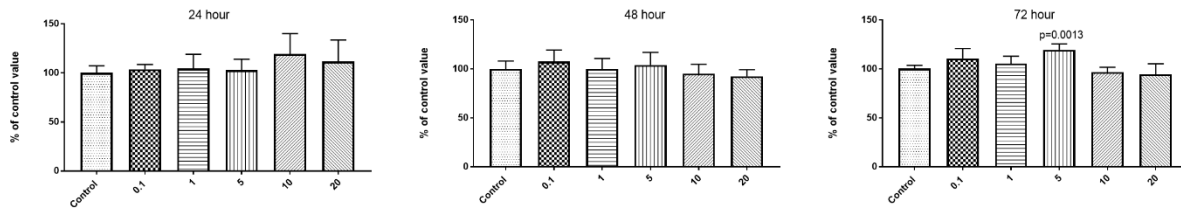

## Viability

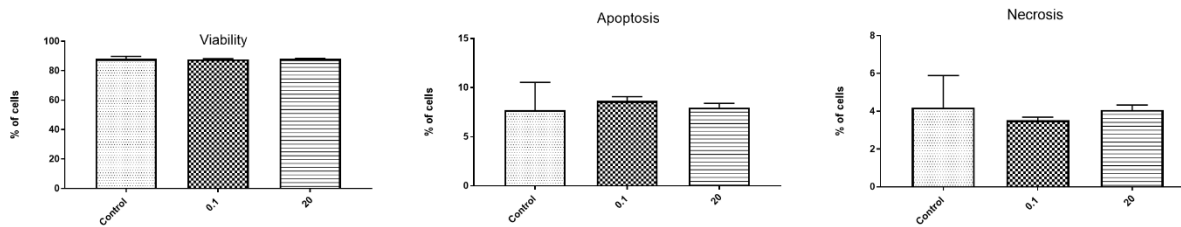

## Cell Cycle

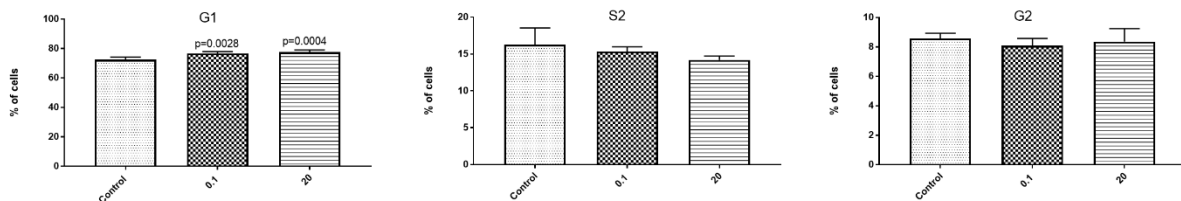

Figure S72. Impact of YEC -GD extract (sample after the *in vitro* digestion of convectionally-dried sample from plants elicited with 0.1% yeast extract) on cytotoxicity (MTT and NR method), type of cell death (Annex V and PI test) and individual phases of the prostate cancer line VCaP – (ATCC® CRL-2876™).
